# Supplementary material for: Exploration of Candidate Genes Involved in the Biosynthesis, Regulation and Recognition of the Male-Produced Aggregation Pheromone of Halyomorpha halys
Source: Insects. 2023 Feb 8;14(2):163. doi: 10.3390/insects14020163 (PMC9960045; doi:10.3390/insects14020163)
Supplement: Supplementary file 1 [file insects-14-00163-s001.zip]

Archive with 6 entries (6 files):
- supplementary figures.pdf
- Supplementary table S1.xls
- Supplementary table S2.xlsx
- Supplementary table S3.xls
- Supplementary table S4.xls
- Supplementary table S5.xls
