# Supplementary material for: Exploration of Candidate Genes Involved in the Biosynthesis, Regulation and Recognition of the Male-Produced Aggregation Pheromone of Halyomorpha halys
Source: Insects. 2023 Feb 8;14(2):163. doi: 10.3390/insects14020163 (PMC9960045; doi:10.3390/insects14020163)
Supplement: Supplementary file 1 [file insects-14-00163-s001.zip › Supplementary table S1.xls]

## Sheet: Sheet1
Supplementary Table S1. SRA numbers and description used in this study
SRA numbers	SRA description
SRR12286913	salivary gland rep1
SRR12286914	salivary gland rep2
SRR12286915	salivary gland rep3
SRR12286916	salivary gland rep4
SRR9969964	gut
SRR9969963	principal salivary gland
SRR9969962	accessory salivary gland
SRR1301984	no_adult
SRR1301985	adult
SRR1206311	2nd instar
SRR1207181	4th instar
SRR1207182	Adult Male
SRR1207183	Adult Female
SRR11747758	male_Antennal
SRR11748354	female_Antennal
