# Supplementary material for: Exploration of Candidate Genes Involved in the Biosynthesis, Regulation and Recognition of the Male-Produced Aggregation Pheromone of Halyomorpha halys
Source: Insects. 2023 Feb 8;14(2):163. doi: 10.3390/insects14020163 (PMC9960045; doi:10.3390/insects14020163)
Supplement: Supplementary file 1 [file insects-14-00163-s001.zip › Supplementary table S2.xlsx]

## Sheet: ortho_orthologs
Supplementary Table S2. orthologous gene clusters between Halyomorpha halys and Murgantia histrionica.
Unigenes of Murgantia histrionica	Genes of Halyomorpha halys	Inflation value
GECQ01012265.1.p1	XP_014289193.1	0.89053
GECQ01012265.1.p1	XP_014289192.1	0.89053
GECQ01503828.1.p1	XP_024215594.1	0.51559
GECQ01298736.1.p1	XP_014280451.1	1.45722
GECQ01298736.1.p1	XP_014280449.1	1.45722
GECQ01298736.1.p1	XP_014280448.1	1.45722
GECQ01298736.1.p1	XP_014280447.1	1.45722
GECQ01126309.1.p1	XP_014283084.2	0.87481
GECQ01243957.1.p1	XP_014287655.1	0.42
GECQ01386174.1.p1	XP_014280957.1	1.45722
GECQ01019720.1.p2	XP_014284746.1	1.45722
GECQ01292845.1.p1	XP_024217338.1	0.99855
GECQ01154696.1.p3	XP_014270575.1	0.2077
GECQ01408885.1.p1	XP_014272263.1	1.45722
GECQ01086019.1.p1	XP_014278535.1	0.4489
GECQ01086019.1.p1	XP_014278534.1	0.4489
GECQ01215871.1.p1	XP_014287780.1	1.45722
GECQ01358109.1.p1	XP_014292798.1	0.57368
GECQ01335409.1.p1	XP_014274167.1	1.45722
GECQ01380998.1.p1	XP_014271224.1	0.55196
GECQ01281366.1.p1	XP_014278597.1	0.3161
GECQ01466372.1.p1	XP_014281786.1	1.45722
GECQ01466372.1.p1	XP_014281785.1	1.45722
GECQ01374643.1.p1	XP_014292564.1	0.2261
GECQ01022040.1.p1	XP_024217601.1	0.69305
GECQ01194973.1.p1	XP_024214570.1	1.45722
GECQ01194973.1.p1	XP_024214569.1	1.45722
GECQ01194973.1.p1	XP_024214568.1	1.45722
GECQ01194973.1.p1	XP_024214567.1	1.45722
GECQ01169135.1.p1	XP_014291675.1	0.0656
GECQ01169135.1.p1	XP_014291668.1	0.0656
GECQ01169135.1.p1	XP_014291662.1	0.0656
GECQ01074234.1.p1	XP_014289894.1	0.2279
GECQ01196815.1.p1	XP_024220132.1	0.55262
GECQ01366895.1.p1	XP_014285346.1	1.02545
GECQ01366895.1.p1	XP_014285345.1	1.02545
GECQ01170023.1.p1	XP_014287645.1	1.45722
GECQ01170023.1.p1	XP_014287644.1	1.45722
GECQ01510362.1.p1	XP_014283554.1	0.6371
GECQ01463073.1.p1	XP_014294015.1	1.45722
GECQ01463073.1.p1	XP_014294014.1	1.45722
GECQ01179751.1.p1	XP_024218870.1	1.45722
GECQ01179751.1.p1	XP_024218869.1	1.45722
GECQ01401014.1.p1	XP_024218826.1	0.2259
GECQ01224320.1.p1	XP_014288469.1	1.45722
GECQ01224320.1.p1	XP_014288459.1	1.45722
GECQ01185965.1.p1	XP_014271404.1	0.1832
GECQ01362965.1.p1	XP_014275635.1	0.3157
GECQ01246762.1.p1	XP_024217390.1	1.45722
GECQ01078682.1.p1	XP_024218231.1	1.45722
GECQ01078682.1.p1	XP_024218230.1	1.45722
GECQ01435483.1.p1	XP_014294609.1	0.0969
GECQ01215717.1.p1	XP_014290265.1	0.75544
GECQ01235381.1.p1	XP_014282482.1	0.80291
GECQ01429524.1.p1	XP_014270767.1	0.2662
GECQ01429524.1.p1	XP_014270766.1	0.2662
GECQ01016222.1.p1	XP_024216180.1	1.30665
GECQ01265890.1.p1	XP_024216734.1	0.51123
GECQ01112447.1.p1	XP_014284918.1	0.3121
GECQ01112447.1.p1	XP_014284917.1	0.3121
GECQ01109542.1.p1	XP_014290473.2	0.1377
GECQ01002896.1.p1	XP_014283480.1	0.2244
GECQ01058530.1.p1	XP_024214939.1	1.45722
GECQ01058530.1.p1	XP_024214938.1	1.45722
GECQ01206227.1.p1	XP_014294021.2	1.45722
GECQ01206227.1.p1	XP_014294020.2	1.45722
GECQ01206227.1.p1	XP_014294019.2	1.45722
GECQ01249892.1.p1	XP_014291570.1	0.56924
GECQ01249892.1.p1	XP_014291569.1	0.56924
GECQ01333172.1.p1	XP_014274337.1	0.4363
GECQ01083559.1.p1	XP_024220026.1	0.2794
GECQ01431430.1.p1	XP_014272170.1	0.58299
GECQ01427924.1.p1	XP_024220127.1	1.45722
GECQ01427924.1.p1	XP_024220126.1	1.45722
GECQ01427924.1.p1	XP_014270889.1	1.45722
GECQ01427924.1.p1	XP_014270888.1	1.45722
GECQ01427924.1.p1	XP_014270886.1	1.45722
GECQ01427924.1.p1	XP_014270884.1	1.45722
GECQ01375226.1.p1	XP_014274011.1	1.41613
GECQ01199403.1.p1	XP_014272993.1	0.47059
GECQ01182941.1.p1	XP_024217214.1	0.93396
GECQ01377637.1.p1	XP_014292713.1	0.4127
GECQ01483620.1.p1	XP_014287015.1	0.45
GECQ01176224.1.p1	XP_014278935.1	0.232
GECQ01191861.1.p1	XP_014290928.1	1.35094
GECQ01191861.1.p1	XP_014290927.1	1.35094
GECQ01191861.1.p1	XP_014290926.1	1.35094
GECQ01191861.1.p1	XP_014290925.1	1.35094
GECQ01191861.1.p1	XP_014290924.1	1.35094
GECQ01191861.1.p1	XP_014290923.1	1.35094
GECQ01191861.1.p1	XP_014290922.1	1.35094
GECQ01245269.1.p1	XP_014292404.1	0.66089
GECQ01517438.1.p1	XP_014279841.1	1.45722
GECQ01517438.1.p1	XP_014279840.1	1.45722
GECQ01517438.1.p1	XP_014279839.1	1.45722
GECQ01517438.1.p1	XP_014279838.1	1.45722
GECQ01062614.1.p1	XP_024215987.1	1.45722
GECQ01062614.1.p1	XP_014283019.1	1.45722
GECQ01221072.1.p2	XP_014294195.1	0.61715
GECQ01352325.1.p1	XP_014281444.1	0.165
GECQ01352325.1.p1	XP_014281435.1	0.165
GECQ01352325.1.p1	XP_014281427.1	0.165
GECQ01116013.1.p1	XP_014290613.2	0.54569
GECQ01244562.1.p1	XP_024217565.1	1.45722
GECQ01244562.1.p1	XP_014281102.1	1.45722
GECQ01244562.1.p1	XP_014281101.1	1.45722
GECQ01244562.1.p1	XP_014281100.1	1.45722
GECQ01043916.1.p1	XP_024215929.1	1.45722
GECQ01043916.1.p1	XP_024215928.1	1.45722
GECQ01348936.1.p1	XP_024214840.1	1.45722
GECQ01430463.1.p1	XP_014281986.1	0.1746
GECQ01163153.1.p1	XP_014272503.1	0.89464
GECQ01227422.1.p2	XP_014293677.1	0.463
GECQ01227422.1.p2	XP_014293314.1	0.463
GECQ01026003.1.p1	XP_014274809.1	1.37978
GECQ01218576.1.p1	XP_014276798.1	1.45722
GECQ01101574.1.p1	XP_024218231.1	1.45722
GECQ01101574.1.p1	XP_024218230.1	1.45722
GECQ01329727.1.p1	XP_014292250.1	0.185
GECQ01155403.1.p1	XP_024217549.1	0.4099
GECQ01312053.1.p1	XP_014289629.1	1.45722
GECQ01329998.1.p1	XP_014288860.1	1.45722
GECQ01128555.1.p1	XP_024215440.1	0.84592
GECQ01112318.1.p1	XP_024216075.1	0.51916
GECQ01265686.1.p1	XP_014288176.1	0.3823
GECQ01138461.1.p1	XP_014276080.1	1.0328
GECQ01232194.1.p1	XP_024218245.1	1.45722
GECQ01244426.1.p1	XP_014275014.1	1.45722
GECQ01244426.1.p1	XP_014275013.1	1.45722
GECQ01244426.1.p1	XP_014275012.1	1.45722
GECQ01244426.1.p1	XP_014275011.1	1.45722
GECQ01244426.1.p1	XP_014275010.1	1.45722
GECQ01244426.1.p1	XP_014275009.1	1.45722
GECQ01244426.1.p1	XP_014275008.1	1.45722
GECQ01168216.1.p1	XP_024215785.1	1.45722
GECQ01168216.1.p1	XP_024215784.1	1.45722
GECQ01168216.1.p1	XP_024215783.1	1.45722
GECQ01168216.1.p1	XP_014290085.1	1.45722
GECQ01168216.1.p1	XP_014290084.1	1.45722
GECQ01168216.1.p1	XP_014290083.1	1.45722
GECQ01168216.1.p1	XP_014290082.1	1.45722
GECQ01168216.1.p1	XP_014290080.1	1.45722
GECQ01168216.1.p1	XP_014290079.1	1.45722
GECQ01168216.1.p1	XP_014290078.1	1.45722
GECQ01168216.1.p1	XP_014290077.1	1.45722
GECQ01168216.1.p1	XP_014290075.1	1.45722
GECQ01168216.1.p1	XP_014290074.1	1.45722
GECQ01168216.1.p1	XP_014290073.1	1.45722
GECQ01168216.1.p1	XP_014290072.1	1.45722
GECQ01168216.1.p1	XP_014290071.1	1.45722
GECQ01168216.1.p1	XP_014290070.1	1.45722
GECQ01168216.1.p1	XP_014290069.1	1.45722
GECQ01168216.1.p1	XP_014290068.1	1.45722
GECQ01168216.1.p1	XP_014290067.1	1.45722
GECQ01045424.1.p1	XP_014282916.1	0.3239
GECQ01211506.1.p1	XP_014292016.1	1.38851
GECQ01166242.1.p1	XP_014291881.1	1.45722
GECQ01166242.1.p1	XP_014291873.1	1.45722
GECQ01166242.1.p1	XP_014291866.1	1.45722
GECQ01166242.1.p1	XP_014291859.1	1.45722
GECQ01166242.1.p1	XP_014291851.1	1.45722
GECQ01085647.1.p1	XP_014280567.1	1.45722
GECQ01085647.1.p1	XP_014280566.1	1.45722
GECQ01257929.1.p1	XP_014272953.1	1.25451
GECQ01016116.1.p1	XP_014288554.1	1.24757
GECQ01104960.1.p1	XP_014284742.1	1.45722
GECQ01104960.1.p1	XP_014284741.1	1.45722
GECQ01104960.1.p1	XP_014284740.1	1.45722
GECQ01104960.1.p1	XP_014284739.1	1.45722
GECQ01104960.1.p1	XP_014284738.1	1.45722
GECQ01104960.1.p1	XP_014284737.1	1.45722
GECQ01402076.1.p1	XP_014293186.1	1.45722
GECQ01248525.1.p1	XP_014273698.1	1.0969
GECQ01055083.1.p1	XP_014278382.1	0.4608
GECQ01323319.1.p1	XP_024215980.1	1.45722
GECQ01518439.1.p1	XP_014288475.1	1.32104
GECQ01219532.1.p1	XP_014284035.1	1.45722
GECQ01219532.1.p1	XP_014284034.1	1.45722
GECQ01157526.1.p1	XP_014276917.1	0.49653
GECQ01517180.1.p1	XP_014276136.1	1.42333
GECQ01160237.1.p1	XP_014283339.1	1.45722
GECQ01160237.1.p1	XP_014283338.1	1.45722
GECQ01094967.1.p1	XP_024218568.1	0.74511
GECQ01427606.1.p1	XP_014270982.1	0.53643
GECQ01160547.1.p1	XP_024216981.1	0.1462
GECQ01490366.1.p1	XP_014290412.1	1.45722
GECQ01187672.1.p1	XP_014292667.1	1.02939
GECQ01220906.1.p1	XP_024218879.1	1.45722
GECQ01372322.1.p1	XP_014288740.1	1.17199
GECQ01483904.1.p1	XP_014279805.1	1.45722
GECQ01293602.1.p1	XP_014281658.1	0.2237
GECQ01481767.1.p1	XP_014280830.1	0.61695
GECQ01104401.1.p1	XP_014288258.1	0.3037
GECQ01399929.1.p1	XP_014282642.1	1.28431
GECQ01492358.1.p1	XP_024214651.1	1.45722
GECQ01492358.1.p1	XP_014283160.1	1.45722
GECQ01101443.1.p1	XP_014288787.1	1.2199
GECQ01039313.1.p2	XP_014287502.1	0.3965
GECQ01039313.1.p2	XP_014287494.1	0.3965
GECQ01039313.1.p2	XP_014287477.1	0.3965
GECQ01215303.1.p1	XP_014291997.1	0.0564
GECQ01050463.1.p1	XP_024216304.1	1.45722
GECQ01050463.1.p1	XP_014280457.1	1.45722
GECQ01224483.1.p1	XP_014294112.1	1.45722
GECQ01224483.1.p1	XP_014294111.1	1.45722
GECQ01224483.1.p1	XP_014294110.1	1.45722
GECQ01072638.1.p1	XP_014285942.1	1.45722
GECQ01072638.1.p1	XP_014285941.1	1.45722
GECQ01136478.1.p1	XP_014284131.1	1.45722
GECQ01286094.1.p1	XP_014291497.1	0.94161
GECQ01294525.1.p1	XP_014271413.1	1.38376
GECQ01388487.1.p1	XP_014288365.1	0.4417
GECQ01455415.1.p1	XP_024220045.1	1.45722
GECQ01455415.1.p1	XP_024220044.1	1.45722
GECQ01455415.1.p1	XP_024220043.1	1.45722
GECQ01455415.1.p1	XP_024220042.1	1.45722
GECQ01455415.1.p1	XP_024220041.1	1.45722
GECQ01125246.1.p1	XP_024219098.1	0.4492
GECQ01004523.1.p1	XP_014280610.1	0.2343
GECQ01517793.1.p1	XP_014275685.1	1.45722
GECQ01517793.1.p1	XP_014275684.1	1.45722
GECQ01517793.1.p1	XP_014275683.1	1.45722
GECQ01517793.1.p1	XP_014275682.1	1.45722
GECQ01517793.1.p1	XP_014275681.1	1.45722
GECQ01517793.1.p1	XP_014275680.1	1.45722
GECQ01517793.1.p1	XP_014275679.1	1.45722
GECQ01517793.1.p1	XP_014275678.1	1.45722
GECQ01517793.1.p1	XP_014275677.1	1.45722
GECQ01517793.1.p1	XP_014275676.1	1.45722
GECQ01517793.1.p1	XP_014275675.1	1.45722
GECQ01517793.1.p1	XP_014275674.1	1.45722
GECQ01517793.1.p1	XP_014275673.1	1.45722
GECQ01517793.1.p1	XP_014275671.1	1.45722
GECQ01219782.1.p1	XP_024216567.1	0.75484
GECQ01424856.1.p1	XP_014282576.1	1.45148
GECQ01317933.1.p1	XP_014284169.2	0.50677
GECQ01468688.1.p1	XP_024214253.1	1.45722
GECQ01468688.1.p1	XP_024214251.1	1.45722
GECQ01468688.1.p1	XP_024214248.1	1.45722
GECQ01468688.1.p1	XP_024214245.1	1.45722
GECQ01468688.1.p1	XP_024214243.1	1.45722
GECQ01468688.1.p1	XP_024214242.1	1.45722
GECQ01468688.1.p1	XP_014287701.1	1.45722
GECQ01468688.1.p1	XP_014287700.1	1.45722
GECQ01232372.1.p1	XP_014283791.1	0.3582
GECQ01134076.1.p1	XP_014275050.1	0.462
GECQ01144007.1.p1	XP_014294301.1	1.12184
GECQ01520373.1.p1	XP_014286605.1	0.3267
GECQ01148080.1.p1	XP_014270264.1	0.77474
GECQ01184027.1.p1	XP_014281839.1	0.69017
GECQ01184027.1.p1	XP_014281838.1	0.69017
GECQ01212178.1.p1	XP_024219090.1	1.45722
GECQ01249160.1.p2	XP_014292805.1	0.82706
GECQ01330173.1.p1	XP_014275411.1	0.50141
GECQ01459524.1.p1	XP_024219193.1	1.45722
GECQ01459524.1.p1	XP_024219192.1	1.45722
GECQ01459524.1.p1	XP_024218712.1	1.45722
GECQ01459524.1.p1	XP_024218055.1	1.45722
GECQ01459524.1.p1	XP_024218054.1	1.45722
GECQ01459524.1.p1	XP_024216642.1	1.45722
GECQ01459524.1.p1	XP_024216304.1	1.45722
GECQ01459524.1.p1	XP_024214753.1	1.45722
GECQ01459524.1.p1	XP_024214270.1	1.45722
GECQ01459524.1.p1	XP_024214269.1	1.45722
GECQ01459524.1.p1	XP_024214268.1	1.45722
GECQ01459524.1.p1	XP_024214267.1	1.45722
GECQ01459524.1.p1	XP_024214266.1	1.45722
GECQ01459524.1.p1	XP_024214265.1	1.45722
GECQ01459524.1.p1	XP_024214264.1	1.45722
GECQ01459524.1.p1	XP_024214263.1	1.45722
GECQ01459524.1.p1	XP_014284130.1	1.45722
GECQ01459524.1.p1	XP_014280457.1	1.45722
GECQ01459524.1.p1	XP_014276767.1	1.45722
GECQ01459524.1.p1	XP_014276766.1	1.45722
GECQ01428970.1.p1	XP_014271457.1	0.90288
GECQ01080767.1.p1	XP_014280827.1	1.08113
GECQ01165815.1.p1	XP_014290152.1	0.421
GECQ01152316.1.p1	XP_014279843.1	0.59669
GECQ01032777.1.p1	XP_014277079.1	0.2475
GECQ01275791.1.p1	XP_014294679.1	0.91207
GECQ01453691.1.p1	XP_024216931.1	1.45722
GECQ01453691.1.p1	XP_024216930.1	1.45722
GECQ01505746.1.p1	XP_024216328.1	0.78125
GECQ01500428.1.p1	XP_014284005.1	0.73977
GECQ01149406.1.p1	XP_014280060.1	1.21756
GECQ01007088.1.p1	XP_014288524.1	0.74976
GECQ01415632.1.p1	XP_014290820.1	0.2324
GECQ01095331.1.p2	XP_014280800.1	0.56287
GECQ01175283.1.p2	XP_014274750.1	1.19347
GECQ01170454.1.p2	XP_014288723.1	0.95197
GECQ01496427.1.p1	XP_024216234.1	1.33604
GECQ01185877.1.p1	XP_014294485.1	0.99184
GECQ01338156.1.p1	XP_024220140.1	0.93787
GECQ01005118.1.p2	XP_024216862.1	1.45722
GECQ01005118.1.p2	XP_024216861.1	1.45722
GECQ01005118.1.p2	XP_024216860.1	1.45722
GECQ01005118.1.p2	XP_024216859.1	1.45722
GECQ01005118.1.p2	XP_024216858.1	1.45722
GECQ01005118.1.p2	XP_014273329.1	1.45722
GECQ01005118.1.p2	XP_014273325.1	1.45722
GECQ01005118.1.p2	XP_014273324.1	1.45722
GECQ01005118.1.p2	XP_014273323.1	1.45722
GECQ01005118.1.p2	XP_014273322.1	1.45722
GECQ01125155.1.p1	XP_014272485.1	0.58999
GECQ01006777.1.p1	XP_024215123.1	1.45722
GECQ01006777.1.p1	XP_024215122.1	1.45722
GECQ01006777.1.p1	XP_014281572.1	1.45722
GECQ01152352.1.p2	XP_014293709.1	0.2564
GECQ01152352.1.p2	XP_014293708.1	0.2564
GECQ01317181.1.p1	XP_014271698.1	0.48302
GECQ01317181.1.p1	XP_014271697.1	0.48302
GECQ01222963.1.p1	XP_024216386.1	1.30584
GECQ01419325.1.p1	XP_014290795.1	1.45722
GECQ01419325.1.p1	XP_014290793.1	1.45722
GECQ01419325.1.p1	XP_014290792.1	1.45722
GECQ01419325.1.p1	XP_014290791.1	1.45722
GECQ01127675.1.p1	XP_014270590.1	0.5936
GECQ01332448.1.p1	XP_024214657.1	0.57115
GECQ01332448.1.p1	XP_024214656.1	0.57115
GECQ01332448.1.p1	XP_014276922.1	0.57115
GECQ01332034.1.p1	XP_014277652.1	1.45722
GECQ01332034.1.p1	XP_014277651.1	1.45722
GECQ01236472.1.p1	XP_014274962.1	1.27301
GECQ01275347.1.p1	XP_014280354.1	0.78964
GECQ01275347.1.p1	XP_014280351.1	0.78964
GECQ01275347.1.p1	XP_014280350.1	0.78964
GECQ01275347.1.p1	XP_014280349.1	0.78964
GECQ01275347.1.p1	XP_014280348.1	0.78964
GECQ01228920.1.p1	XP_014271319.1	0.47048
GECQ01173485.1.p2	XP_014274441.1	0.65291
GECQ01362135.1.p1	XP_014276236.1	1.33595
GECQ01362135.1.p1	XP_014276234.1	1.33595
GECQ01362135.1.p1	XP_014276233.1	1.33595
GECQ01074291.1.p1	XP_014270283.1	1.45722
GECQ01074291.1.p1	XP_014270282.1	1.45722
GECQ01074291.1.p1	XP_014270280.1	1.45722
GECQ01074291.1.p1	XP_014270279.1	1.45722
GECQ01074291.1.p1	XP_014270278.1	1.45722
GECQ01074291.1.p1	XP_014270277.1	1.45722
GECQ01074291.1.p1	XP_014270275.1	1.45722
GECQ01074291.1.p1	XP_014270273.1	1.45722
GECQ01074291.1.p1	XP_014270272.1	1.45722
GECQ01074291.1.p1	XP_014270271.1	1.45722
GECQ01196844.1.p1	XP_014294706.1	1.45722
GECQ01196844.1.p1	XP_014294705.1	1.45722
GECQ01196844.1.p1	XP_014294704.1	1.45722
GECQ01196844.1.p1	XP_014294703.1	1.45722
GECQ01196844.1.p1	XP_014294702.1	1.45722
GECQ01196844.1.p1	XP_014294701.1	1.45722
GECQ01513741.1.p1	XP_014285237.1	0.55656
GECQ01262965.1.p2	XP_014271161.1	0.7051
GECQ01043489.1.p1	XP_014294379.1	0.9727
GECQ01061275.1.p1	XP_014291943.1	0.52709
GECQ01494505.1.p1	XP_014282490.1	0.63741
GECQ01385400.1.p1	XP_014287034.1	1.45722
GECQ01495224.1.p1	XP_014284033.1	0.3989
GECQ01226969.1.p1	XP_014288254.1	0.94998
GECQ01375609.1.p1	XP_024217128.1	1.45722
GECQ01375609.1.p1	XP_014279974.1	1.45722
GECQ01375609.1.p1	XP_014279973.1	1.45722
GECQ01375609.1.p1	XP_014279972.1	1.45722
GECQ01375609.1.p1	XP_014279971.1	1.45722
GECQ01154206.1.p1	XP_014272430.1	1.45722
GECQ01154206.1.p1	XP_014272429.1	1.45722
GECQ01154206.1.p1	XP_014272428.1	1.45722
GECQ01154206.1.p1	XP_014272427.1	1.45722
GECQ01154206.1.p1	XP_014272426.1	1.45722
GECQ01311892.1.p1	XP_014281292.1	0.83784
GECQ01311892.1.p1	XP_014281290.1	0.83784
GECQ01429303.1.p1	XP_014287825.1	1.43439
GECQ01232196.1.p1	XP_024218245.1	1.45722
GECQ01456963.1.p1	XP_014282045.1	1.12196
GECQ01209526.1.p1	XP_014275692.1	0.8301
GECQ01334961.1.p1	XP_014290093.2	0.4085
GECQ01417802.1.p1	XP_014280547.1	0.437
GECQ01322877.1.p1	XP_014271843.1	0.3432
GECQ01182520.1.p1	XP_014284612.1	1.19703
GECQ01182520.1.p1	XP_014284611.1	1.19703
GECQ01182520.1.p1	XP_014284610.1	1.19703
GECQ01375346.1.p1	XP_014286246.1	1.45722
GECQ01289311.1.p1	XP_014281966.1	0.60455
GECQ01281276.1.p1	XP_014270816.1	1.45722
GECQ01281276.1.p1	XP_014270815.1	1.45722
GECQ01281276.1.p1	XP_014270814.1	1.45722
GECQ01449075.1.p1	XP_014282980.1	0.2134
GECQ01328643.1.p1	XP_014284488.1	1.01924
GECQ01328643.1.p1	XP_014284487.1	1.01924
GECQ01063218.1.p1	XP_024214989.1	1.07742
GECQ01155936.1.p1	XP_014288012.1	1.45722
GECQ01322263.1.p1	XP_014276287.1	0.74354
GECQ01250088.1.p1	XP_014273547.1	0.3685
GECQ01072632.1.p2	XP_024218096.1	0.73277
GECQ01155648.1.p2	XP_014282812.1	0.56373
GECQ01188203.1.p1	XP_014275858.1	1.45722
GECQ01188203.1.p1	XP_014275850.1	1.45722
GECQ01188203.1.p1	XP_014275841.1	1.45722
GECQ01022593.1.p2	XP_014270919.1	0.4176
GECQ01022593.1.p2	XP_014270917.1	0.4176
GECQ01336834.1.p1	XP_014277162.1	1.45722
GECQ01164555.1.p3	XP_014276151.1	0.75706
GECQ01181780.1.p1	XP_014278493.1	0.79923
GECQ01061277.1.p1	XP_014291943.1	0.52709
GECQ01376612.1.p1	XP_024214521.1	1.45722
GECQ01376612.1.p1	XP_024214520.1	1.45722
GECQ01376612.1.p1	XP_024214519.1	1.45722
GECQ01376612.1.p1	XP_024214518.1	1.45722
GECQ01376612.1.p1	XP_024214517.1	1.45722
GECQ01376612.1.p1	XP_024214516.1	1.45722
GECQ01376612.1.p1	XP_024214515.1	1.45722
GECQ01376612.1.p1	XP_024214514.1	1.45722
GECQ01376612.1.p1	XP_024214513.1	1.45722
GECQ01376612.1.p1	XP_024214512.1	1.45722
GECQ01376612.1.p1	XP_024214511.1	1.45722
GECQ01376612.1.p1	XP_024214510.1	1.45722
GECQ01376612.1.p1	XP_024214509.1	1.45722
GECQ01376612.1.p1	XP_024214508.1	1.45722
GECQ01376612.1.p1	XP_024214507.1	1.45722
GECQ01376612.1.p1	XP_024214506.1	1.45722
GECQ01376612.1.p1	XP_024214505.1	1.45722
GECQ01376612.1.p1	XP_024214504.1	1.45722
GECQ01376612.1.p1	XP_024214503.1	1.45722
GECQ01376612.1.p1	XP_024214502.1	1.45722
GECQ01376612.1.p1	XP_024214501.1	1.45722
GECQ01376612.1.p1	XP_024214500.1	1.45722
GECQ01376612.1.p1	XP_024214499.1	1.45722
GECQ01376612.1.p1	XP_024214498.1	1.45722
GECQ01376612.1.p1	XP_024214497.1	1.45722
GECQ01376612.1.p1	XP_024214496.1	1.45722
GECQ01376612.1.p1	XP_024214495.1	1.45722
GECQ01376612.1.p1	XP_024214494.1	1.45722
GECQ01376612.1.p1	XP_024214493.1	1.45722
GECQ01376612.1.p1	XP_024214492.1	1.45722
GECQ01376612.1.p1	XP_024214491.1	1.45722
GECQ01376612.1.p1	XP_024214490.1	1.45722
GECQ01376612.1.p1	XP_024214489.1	1.45722
GECQ01218030.1.p1	XP_024220078.1	1.22514
GECQ01218030.1.p1	XP_024220077.1	1.22514
GECQ01218030.1.p1	XP_024220076.1	1.22514
GECQ01502707.1.p1	XP_014284168.1	1.45722
GECQ01065254.1.p1	XP_024220060.1	1.45722
GECQ01087978.1.p1	XP_024215360.1	1.1211
GECQ01087978.1.p1	XP_014287886.1	1.1211
GECQ01291419.1.p2	XP_014270515.1	1.45722
GECQ01198370.1.p1	XP_024217582.1	1.2278
GECQ01239240.1.p1	XP_024214889.1	1.09652
GECQ01239240.1.p1	XP_024214888.1	1.09652
GECQ01239240.1.p1	XP_024214887.1	1.09652
GECQ01239240.1.p1	XP_024214886.1	1.09652
GECQ01239240.1.p1	XP_024214885.1	1.09652
GECQ01239240.1.p1	XP_024214884.1	1.09652
GECQ01172995.1.p1	XP_014272731.1	1.20536
GECQ01017075.1.p2	XP_014274028.1	0.52391
GECQ01442635.1.p1	XP_014280807.1	1.02133
GECQ01442635.1.p1	XP_014280806.1	1.02133
GECQ01442635.1.p1	XP_014280805.1	1.02133
GECQ01246920.1.p1	XP_014285151.1	1.45722
GECQ01246920.1.p1	XP_014285150.1	1.45722
GECQ01039310.1.p1	XP_014287462.1	1.45722
GECQ01039310.1.p1	XP_014287454.1	1.45722
GECQ01174231.1.p1	XP_014282084.1	1.45722
GECQ01174231.1.p1	XP_014282083.1	1.45722
GECQ01174231.1.p1	XP_014282082.1	1.45722
GECQ01376226.1.p1	XP_014278442.1	0.50988
GECQ01161091.1.p2	XP_014287154.1	0.3468
GECQ01038336.1.p1	XP_014294792.1	1.32716
GECQ01499611.1.p1	XP_024214762.1	1.45722
GECQ01156161.1.p1	XP_024217687.1	0.48509
GECQ01035372.1.p1	XP_014289279.1	1.15005
GECQ01161239.1.p1	XP_014272355.1	0.59647
GECQ01182942.1.p1	XP_024217214.1	0.93396
GECQ01470706.1.p1	XP_014278797.1	1.45722
GECQ01485006.1.p1	XP_014283942.1	1.45722
GECQ01485006.1.p1	XP_014283941.1	1.45722
GECQ01485006.1.p1	XP_014283940.1	1.45722
GECQ01414108.1.p1	XP_024218500.1	1.45722
GECQ01414108.1.p1	XP_014287994.2	1.45722
GECQ01414108.1.p1	XP_014283346.1	1.45722
GECQ01418033.1.p1	XP_014274776.1	1.45722
GECQ01105117.1.p1	XP_024214634.1	1.45722
GECQ01105117.1.p1	XP_024214633.1	1.45722
GECQ01105117.1.p1	XP_024214632.1	1.45722
GECQ01105117.1.p1	XP_024214631.1	1.45722
GECQ01105117.1.p1	XP_024214630.1	1.45722
GECQ01105117.1.p1	XP_024214628.1	1.45722
GECQ01105117.1.p1	XP_024214627.1	1.45722
GECQ01457735.1.p1	XP_024214050.1	1.45722
GECQ01388700.1.p1	XP_014283320.1	0.0618
GECQ01362793.1.p1	XP_024218926.1	0.4154
GECQ01233055.1.p1	XP_014273515.1	1.45722
GECQ01195436.1.p1	XP_014276531.1	0.91672
GECQ01508351.1.p1	XP_014289150.1	1.45722
GECQ01508351.1.p1	XP_014289148.1	1.45722
GECQ01508351.1.p1	XP_014289147.1	1.45722
GECQ01508351.1.p1	XP_014289146.1	1.45722
GECQ01508351.1.p1	XP_014289143.1	1.45722
GECQ01508351.1.p1	XP_014289142.1	1.45722
GECQ01324305.1.p1	XP_014285028.2	0.89358
GECQ01312468.1.p1	XP_014277557.1	0.75734
GECQ01120157.1.p1	XP_014285955.1	0.91843
GECQ01129695.1.p1	XP_014281052.1	1.45722
GECQ01210615.1.p1	XP_024216370.1	0.3824
GECQ01181954.1.p1	XP_024218827.1	0.2613
GECQ01319008.1.p1	XP_014289497.1	0.2367
GECQ01027289.1.p1	XP_014288343.1	0.4443
GECQ01474034.1.p1	XP_014284951.1	1.45722
GECQ01209683.1.p3	XP_024217614.1	1.45722
GECQ01217365.1.p1	XP_024220097.1	0.63888
GECQ01217365.1.p1	XP_014274595.1	0.63888
GECQ01217365.1.p1	XP_014274594.1	0.63888
GECQ01217365.1.p1	XP_014274593.1	0.63888
GECQ01217365.1.p1	XP_014274591.1	0.63888
GECQ01217365.1.p1	XP_014274590.1	0.63888
GECQ01259560.1.p1	XP_014287800.1	0.2985
GECQ01031896.1.p2	XP_014294495.1	0.2743
GECQ01199099.1.p1	XP_014291117.1	1.09807
GECQ01163996.1.p1	XP_024215667.1	1.45722
GECQ01163996.1.p1	XP_024215666.1	1.45722
GECQ01163996.1.p1	XP_024215665.1	1.45722
GECQ01163996.1.p1	XP_014272897.1	1.45722
GECQ01430545.1.p2	XP_014290739.1	1.21509
GECQ01314414.1.p1	XP_014288719.1	1.45722
GECQ01314414.1.p1	XP_014288718.1	1.45722
GECQ01436131.1.p1	XP_024218318.1	0.3333
GECQ01487444.1.p1	XP_014277090.1	0.97088
GECQ01487444.1.p1	XP_014277089.1	0.97088
GECQ01487444.1.p1	XP_014277088.1	0.97088
GECQ01487444.1.p1	XP_014277087.1	0.97088
GECQ01487444.1.p1	XP_014277085.1	0.97088
GECQ01348746.1.p1	XP_014274135.1	0.4105
GECQ01421163.1.p1	XP_014281213.1	1.45722
GECQ01421163.1.p1	XP_014281212.1	1.45722
GECQ01150541.1.p1	XP_024217035.1	1.45722
GECQ01150541.1.p1	XP_024217034.1	1.45722
GECQ01150541.1.p1	XP_014288824.1	1.45722
GECQ01150541.1.p1	XP_014288823.1	1.45722
GECQ01150541.1.p1	XP_014288822.1	1.45722
GECQ01150541.1.p1	XP_014288821.1	1.45722
GECQ01200031.1.p1	XP_014275588.1	1.45722
GECQ01160260.1.p1	XP_014289051.1	1.41157
GECQ01441831.1.p1	XP_024217762.1	1.45722
GECQ01441831.1.p1	XP_024215408.1	1.45722
GECQ01207246.1.p1	XP_014281605.2	1.45722
GECQ01196017.1.p1	XP_014271131.1	0.2976
GECQ01422939.1.p1	XP_024215698.1	1.45722
GECQ01422939.1.p1	XP_014293177.1	1.45722
GECQ01422939.1.p1	XP_014293171.1	1.45722
GECQ01518628.1.p1	XP_014287963.1	0.54415
GECQ01084499.1.p1	XP_014285097.1	1.45722
GECQ01084499.1.p1	XP_014285096.1	1.45722
GECQ01084499.1.p1	XP_014285095.1	1.45722
GECQ01084499.1.p1	XP_014285094.1	1.45722
GECQ01084499.1.p1	XP_014285093.1	1.45722
GECQ01084499.1.p1	XP_014285092.1	1.45722
GECQ01084499.1.p1	XP_014285091.1	1.45722
GECQ01084499.1.p1	XP_014285090.1	1.45722
GECQ01084499.1.p1	XP_014285088.1	1.45722
GECQ01084499.1.p1	XP_014285087.1	1.45722
GECQ01221833.1.p1	XP_024218619.1	1.45722
GECQ01198200.1.p1	XP_014277201.1	1.26873
GECQ01480545.1.p1	XP_014288326.1	0.97086
GECQ01343518.1.p1	XP_014287568.1	1.45722
GECQ01351417.1.p1	XP_014278452.1	1.21477
GECQ01211591.1.p1	XP_014293982.1	0.2911
GECQ01402984.1.p1	XP_014272887.1	1.45393
GECQ01334398.1.p1	XP_014274615.1	0.3995
GECQ01240358.1.p1	XP_014282074.1	0.74635
GECQ01500558.1.p1	XP_024214234.1	0.47869
GECQ01500558.1.p1	XP_014286555.1	0.47869
GECQ01500558.1.p1	XP_014286554.1	0.47869
GECQ01500558.1.p1	XP_014286553.1	0.47869
GECQ01194335.1.p1	XP_014286500.1	0.59816
GECQ01293051.1.p1	XP_014271785.1	0.3869
GECQ01045850.1.p1	XP_014286013.1	1.45722
GECQ01045850.1.p1	XP_014286012.1	1.45722
GECQ01045850.1.p1	XP_014286011.1	1.45722
GECQ01045850.1.p1	XP_014286010.1	1.45722
GECQ01045850.1.p1	XP_014286009.1	1.45722
GECQ01045850.1.p1	XP_014286008.1	1.45722
GECQ01391031.1.p2	XP_024218186.1	0.1237
GECQ01487789.1.p2	XP_014285196.1	0.46879
GECQ01322621.1.p1	XP_014288889.1	1.25686
GECQ01068638.1.p1	XP_024218736.1	1.45722
GECQ01068638.1.p1	XP_024218735.1	1.45722
GECQ01068638.1.p1	XP_024218734.1	1.45722
GECQ01287751.1.p1	XP_014277742.1	0.72933
GECQ01178512.1.p1	XP_014271974.1	1.23854
GECQ01256027.1.p1	XP_014274862.2	0.70216
GECQ01223619.1.p1	XP_024215766.1	0.345
GECQ01047319.1.p1	XP_014289972.1	0.98865
GECQ01204509.1.p1	XP_014270980.1	1.32148
GECQ01400649.1.p1	XP_014275319.1	0.72892
GECQ01432312.1.p1	XP_014292876.1	0.84034
GECQ01261388.1.p1	XP_014270316.1	0.81892
GECQ01522548.1.p1	XP_024219405.1	1.38918
GECQ01167732.1.p1	XP_014278444.1	0.2475
GECQ01511447.1.p1	XP_014273205.1	0.2258
GECQ01126745.1.p1	XP_014277511.1	1.45722
GECQ01246477.1.p1	XP_014286131.1	0.84353
GECQ01191209.1.p1	XP_014274978.1	0.3535
GECQ01364416.1.p1	XP_014273356.1	0.74134
GECQ01162868.1.p2	XP_014287340.1	0.2075
GECQ01232649.1.p1	XP_014290451.1	0.4451
GECQ01319468.1.p1	XP_014282648.1	1.45722
GECQ01319468.1.p1	XP_014282647.1	1.45722
GECQ01319468.1.p1	XP_014282646.1	1.45722
GECQ01319468.1.p1	XP_014282645.1	1.45722
GECQ01185695.1.p1	XP_024214304.1	1.0533
GECQ01496787.1.p1	XP_014272416.1	0.8052
GECQ01408450.1.p1	XP_014274974.1	1.45722
GECQ01141361.1.p1	XP_014275662.1	1.45722
GECQ01156666.1.p1	XP_014277076.1	1.45722
GECQ01156666.1.p1	XP_014277075.1	1.45722
GECQ01156666.1.p1	XP_014277074.1	1.45722
GECQ01156666.1.p1	XP_014277072.1	1.45722
GECQ01049856.1.p1	XP_024215166.1	0.475
GECQ01104722.1.p1	XP_014277892.1	1.29543
GECQ01210611.1.p1	XP_024215245.1	1.45722
GECQ01210611.1.p1	XP_014284838.1	1.45722
GECQ01210611.1.p1	XP_014284837.1	1.45722
GECQ01210611.1.p1	XP_014284836.1	1.45722
GECQ01210611.1.p1	XP_014284835.1	1.45722
GECQ01210611.1.p1	XP_014284834.1	1.45722
GECQ01210611.1.p1	XP_014284833.1	1.45722
GECQ01210611.1.p1	XP_014284832.1	1.45722
GECQ01445077.1.p1	XP_014280040.1	1.45722
GECQ01445077.1.p1	XP_014280039.1	1.45722
GECQ01445077.1.p1	XP_014280038.1	1.45722
GECQ01437309.1.p1	XP_024218202.1	0.4584
GECQ01430528.1.p1	XP_014274745.1	0.93811
GECQ01145855.1.p1	XP_014291239.1	0.3167
GECQ01050824.1.p1	XP_014276366.1	1.45722
GECQ01050824.1.p1	XP_014276365.1	1.45722
GECQ01050824.1.p1	XP_014276364.1	1.45722
GECQ01104917.1.p1	XP_014291441.1	1.36761
GECQ01275468.1.p1	XP_014276914.1	0.64333
GECQ01275468.1.p1	XP_014276913.1	0.64333
GECQ01275468.1.p1	XP_014276912.1	0.64333
GECQ01275468.1.p1	XP_014276910.1	0.64333
GECQ01425028.1.p1	XP_014289860.1	1.45722
GECQ01425028.1.p1	XP_014289859.1	1.45722
GECQ01198259.1.p1	XP_024217089.1	1.45722
GECQ01198259.1.p1	XP_024217088.1	1.45722
GECQ01062051.1.p2	XP_014279306.1	0.3178
GECQ01062051.1.p2	XP_014279305.1	0.3178
GECQ01062051.1.p2	XP_014279304.1	0.3178
GECQ01394325.1.p1	XP_014282895.1	0.324
GECQ01433330.1.p1	XP_014278539.1	0.98495
GECQ01433330.1.p1	XP_014278537.1	0.98495
GECQ01433330.1.p1	XP_014278536.1	0.98495
GECQ01080721.1.p1	XP_014276467.1	0.80288
GECQ01199923.1.p1	XP_024218774.1	1.36266
GECQ01003578.1.p1	XP_024215925.1	1.45722
GECQ01003578.1.p1	XP_014294086.1	1.45722
GECQ01003578.1.p1	XP_014294082.1	1.45722
GECQ01003578.1.p1	XP_014294080.2	1.45722
GECQ01138856.1.p1	XP_024214360.1	1.45722
GECQ01335292.1.p1	XP_014271002.1	0.2865
GECQ01243766.1.p2	XP_014286332.1	0.60213
GECQ01520694.1.p1	XP_014283579.1	0.3379
GECQ01159888.1.p1	XP_014291572.1	0.991
GECQ01187307.1.p1	XP_024217551.1	1.45722
GECQ01187307.1.p1	XP_024217550.1	1.45722
GECQ01200976.1.p1	XP_014281007.1	0.92699
GECQ01155519.1.p1	XP_014282101.1	0.66163
GECQ01200030.1.p1	XP_014275588.1	1.45722
GECQ01192452.1.p1	XP_014276167.2	0.94142
GECQ01215329.1.p1	XP_014294064.1	1.45722
GECQ01072705.1.p1	XP_014276847.2	1.45722
GECQ01072705.1.p1	XP_014276846.2	1.45722
GECQ01072705.1.p1	XP_014276845.2	1.45722
GECQ01511876.1.p1	XP_014275047.1	1.45722
GECQ01019339.1.p1	XP_014291572.1	0.991
GECQ01486413.1.p1	XP_024218203.1	1.45722
GECQ01486413.1.p1	XP_024217753.1	1.45722
GECQ01131494.1.p1	XP_024215533.1	1.45722
GECQ01131494.1.p1	XP_014285666.1	1.45722
GECQ01131494.1.p1	XP_014285665.1	1.45722
GECQ01131494.1.p1	XP_014285664.1	1.45722
GECQ01436007.1.p2	XP_014280888.1	0.80245
GECQ01201254.1.p1	XP_014275817.1	1.45722
GECQ01138324.1.p1	XP_014283265.1	1.45722
GECQ01138324.1.p1	XP_014283264.1	1.45722
GECQ01021511.1.p1	XP_024216246.1	0.60645
GECQ01307532.1.p1	XP_014278800.1	1.31631
GECQ01119621.1.p1	XP_014293222.2	1.45722
GECQ01162007.1.p1	XP_014281803.1	1.0138
GECQ01079262.1.p1	XP_014288296.1	1.45722
GECQ01079262.1.p1	XP_014288289.1	1.45722
GECQ01248369.1.p1	XP_024214562.1	1.16273
GECQ01256214.1.p1	XP_014272936.1	0.339
GECQ01242616.1.p1	XP_014285689.1	1.05609
GECQ01348664.1.p1	XP_014292514.2	1.18717
GECQ01496788.1.p2	XP_014272416.1	0.8052
GECQ01173434.1.p1	XP_014281788.1	0.4522
GECQ01185491.1.p1	XP_014288874.1	1.28319
GECQ01491261.1.p1	XP_014274581.1	0.3785
GECQ01403543.1.p1	XP_014279072.1	0.86476
GECQ01375837.1.p1	XP_014289845.1	1.45722
GECQ01509793.1.p1	XP_014278338.1	0.4481
GECQ01492147.1.p1	XP_014279896.1	1.45722
GECQ01492147.1.p1	XP_014279895.1	1.45722
GECQ01492147.1.p1	XP_014279894.1	1.45722
GECQ01447239.1.p1	XP_014291672.1	0.4175
GECQ01196971.1.p1	XP_014285390.1	1.45722
GECQ01196971.1.p1	XP_014285389.1	1.45722
GECQ01296317.1.p1	XP_014286033.1	1.45722
GECQ01440365.1.p2	XP_024216432.1	1.45722
GECQ01440365.1.p2	XP_014273175.1	1.45722
GECQ01440365.1.p2	XP_014273174.1	1.45722
GECQ01440365.1.p2	XP_014273173.1	1.45722
GECQ01440365.1.p2	XP_014273172.1	1.45722
GECQ01207496.1.p1	XP_014283841.1	1.22528
GECQ01497588.1.p1	XP_014274754.1	0.4206
GECQ01291364.1.p1	XP_014278640.1	0.52262
GECQ01187078.1.p1	XP_014294056.1	0.84301
GECQ01229215.1.p1	XP_014290049.1	1.04268
GECQ01234112.1.p1	XP_014281315.1	0.901
GECQ01234112.1.p1	XP_014281310.1	0.901
GECQ01234112.1.p1	XP_014281301.1	0.901
GECQ01520076.1.p1	XP_024219446.1	1.18893
GECQ01153156.1.p1	XP_014286910.1	0.3962
GECQ01072682.1.p1	XP_014276402.1	1.06658
GECQ01230281.1.p1	XP_014274933.1	0.80289
GECQ01215780.1.p2	XP_014286245.1	0.77704
GECQ01430558.1.p3	XP_014279225.1	1.02555
GECQ01160234.1.p1	XP_014283339.1	1.45722
GECQ01160234.1.p1	XP_014283338.1	1.45722
GECQ01378199.1.p1	XP_024215301.1	0.85587
GECQ01077064.1.p1	XP_014276271.1	1.04654
GECQ01428491.1.p2	XP_014281186.1	0.1726
GECQ01099346.1.p1	XP_024218816.1	0.2517
GECQ01464010.1.p1	XP_024216522.1	0.62326
GECQ01464010.1.p1	XP_024216521.1	0.62326
GECQ01464010.1.p1	XP_024216520.1	0.62326
GECQ01464010.1.p1	XP_024216519.1	0.62326
GECQ01464010.1.p1	XP_024216518.1	0.62326
GECQ01372940.1.p1	XP_024218439.1	0.3795
GECQ01398607.1.p1	XP_014275626.1	0.63445
GECQ01216701.1.p1	XP_014290534.1	1.45722
GECQ01216701.1.p1	XP_014290526.1	1.45722
GECQ01276559.1.p1	XP_014276684.1	0.74182
GECQ01025665.1.p1	XP_014273470.1	1.45722
GECQ01412867.1.p2	XP_014282261.1	1.45722
GECQ01412867.1.p2	XP_014282260.1	1.45722
GECQ01412867.1.p2	XP_014282259.1	1.45722
GECQ01412867.1.p2	XP_014282258.1	1.45722
GECQ01412867.1.p2	XP_014282257.1	1.45722
GECQ01412867.1.p2	XP_014282256.1	1.45722
GECQ01412867.1.p2	XP_014282255.1	1.45722
GECQ01412867.1.p2	XP_014282254.1	1.45722
GECQ01016435.1.p1	XP_014289860.1	1.45722
GECQ01016435.1.p1	XP_014289859.1	1.45722
GECQ01008412.1.p1	XP_014285698.1	0.57478
GECQ01373995.1.p2	XP_014284130.1	1.45722
GECQ01168217.1.p1	XP_024215785.1	1.45722
GECQ01168217.1.p1	XP_024215784.1	1.45722
GECQ01168217.1.p1	XP_024215783.1	1.45722
GECQ01168217.1.p1	XP_014290085.1	1.45722
GECQ01168217.1.p1	XP_014290084.1	1.45722
GECQ01168217.1.p1	XP_014290083.1	1.45722
GECQ01168217.1.p1	XP_014290082.1	1.45722
GECQ01168217.1.p1	XP_014290080.1	1.45722
GECQ01168217.1.p1	XP_014290079.1	1.45722
GECQ01168217.1.p1	XP_014290078.1	1.45722
GECQ01168217.1.p1	XP_014290077.1	1.45722
GECQ01168217.1.p1	XP_014290075.1	1.45722
GECQ01168217.1.p1	XP_014290074.1	1.45722
GECQ01168217.1.p1	XP_014290073.1	1.45722
GECQ01168217.1.p1	XP_014290072.1	1.45722
GECQ01168217.1.p1	XP_014290071.1	1.45722
GECQ01168217.1.p1	XP_014290070.1	1.45722
GECQ01168217.1.p1	XP_014290069.1	1.45722
GECQ01168217.1.p1	XP_014290068.1	1.45722
GECQ01168217.1.p1	XP_014290067.1	1.45722
GECQ01224935.1.p1	XP_014280192.1	1.45722
GECQ01366171.1.p1	XP_014272704.2	0.4194
GECQ01043582.1.p1	XP_024217530.1	0.85837
GECQ01400904.1.p1	XP_024216793.1	0.2522
GECQ01400904.1.p1	XP_024216792.1	0.2522
GECQ01265492.1.p1	XP_014276751.1	0.98391
GECQ01209178.1.p1	XP_014287080.1	1.26481
GECQ01189345.1.p1	XP_014278072.1	0.75188
GECQ01451338.1.p1	XP_014293414.1	1.26385
GECQ01189314.1.p1	XP_014283416.1	1.45722
GECQ01139753.1.p1	XP_014281327.1	1.45722
GECQ01438811.1.p1	XP_014292541.1	1.45722
GECQ01061383.1.p1	XP_014283039.2	1.45722
GECQ01343566.1.p1	XP_014285899.1	1.33623
GECQ01417831.1.p1	XP_014292932.1	0.91446
GECQ01240089.1.p2	XP_014294562.1	0.4128
GECQ01163567.1.p1	XP_014282066.1	1.37394
GECQ01163567.1.p1	XP_014282065.1	1.37394
GECQ01163567.1.p1	XP_014282064.1	1.37394
GECQ01376956.1.p2	XP_014287548.1	0.3226
GECQ01227695.1.p1	XP_014285148.1	0.91318
GECQ01227423.1.p2	XP_014293677.1	0.463
GECQ01227423.1.p2	XP_014293314.1	0.463
GECQ01159493.1.p1	XP_024218715.1	0.329
GECQ01434647.1.p1	XP_014273624.1	1.45722
GECQ01434647.1.p1	XP_014273623.1	1.45722
GECQ01195183.1.p1	XP_014280815.1	1.45722
GECQ01222413.1.p1	XP_014292484.1	1.21203
GECQ01213550.1.p1	XP_014279887.1	0.74209
GECQ01430054.1.p1	XP_014288589.1	1.25999
GECQ01098358.1.p1	XP_014274376.1	1.07437
GECQ01012266.1.p1	XP_014289193.1	0.89053
GECQ01012266.1.p1	XP_014289192.1	0.89053
GECQ01221837.1.p1	XP_024217565.1	1.45722
GECQ01221837.1.p1	XP_014281102.1	1.45722
GECQ01221837.1.p1	XP_014281101.1	1.45722
GECQ01221837.1.p1	XP_014281100.1	1.45722
GECQ01272391.1.p1	XP_014283609.1	1.45722
GECQ01272391.1.p1	XP_014283608.1	1.45722
GECQ01409815.1.p1	XP_014280590.1	0.51485
GECQ01409815.1.p1	XP_014280589.1	0.51485
GECQ01448139.1.p1	XP_014288523.1	1.45722
GECQ01299446.1.p1	XP_014294482.1	0.77415
GECQ01152766.1.p1	XP_014276439.1	1.45722
GECQ01401929.1.p2	XP_014280970.1	0.418
GECQ01506644.1.p1	XP_024216156.1	1.45722
GECQ01506644.1.p1	XP_024216155.1	1.45722
GECQ01506644.1.p1	XP_024216154.1	1.45722
GECQ01506644.1.p1	XP_024216153.1	1.45722
GECQ01482471.1.p2	XP_024217230.1	1.40733
GECQ01482471.1.p2	XP_014284940.1	1.40733
GECQ01219382.1.p1	XP_024214832.1	1.45722
GECQ01219382.1.p1	XP_014287112.1	1.45722
GECQ01219382.1.p1	XP_014287111.1	1.45722
GECQ01219382.1.p1	XP_014287110.1	1.45722
GECQ01219382.1.p1	XP_014287109.1	1.45722
GECQ01481769.1.p1	XP_014280830.1	0.61695
GECQ01099299.1.p1	XP_014290751.1	0.63286
GECQ01290897.1.p2	XP_014276347.1	0.59872
GECQ01409775.1.p1	XP_014276133.1	0.2839
GECQ01089765.1.p1	XP_024219543.1	1.1026
GECQ01207884.1.p1	XP_014289629.1	1.45722
GECQ01061276.1.p1	XP_014291943.1	0.52709
GECQ01506040.1.p1	XP_014270219.1	1.45722
GECQ01506040.1.p1	XP_014270218.1	1.45722
GECQ01506040.1.p1	XP_014270217.1	1.45722
GECQ01506040.1.p1	XP_014270216.1	1.45722
GECQ01506040.1.p1	XP_014270215.1	1.45722
GECQ01202823.1.p1	XP_014279683.1	0.2164
GECQ01157458.1.p1	XP_014283216.1	0.4494
GECQ01120400.1.p2	XP_014277323.1	0.4245
GECQ01029911.1.p1	XP_014283991.1	0.5378
GECQ01190355.1.p1	XP_014276025.1	1.09696
GECQ01051093.1.p1	XP_024215416.1	1.45722
GECQ01051093.1.p1	XP_024215415.1	1.45722
GECQ01051093.1.p1	XP_014280766.1	1.45722
GECQ01051093.1.p1	XP_014280765.1	1.45722
GECQ01386176.1.p1	XP_014280957.1	1.45722
GECQ01436328.1.p1	XP_024218092.1	1.45722
GECQ01436328.1.p1	XP_014280384.1	1.45722
GECQ01436328.1.p1	XP_014280383.1	1.45722
GECQ01436328.1.p1	XP_014280382.1	1.45722
GECQ01436328.1.p1	XP_014280381.1	1.45722
GECQ01436328.1.p1	XP_014280379.1	1.45722
GECQ01052482.1.p1	XP_014289667.1	0.0704
GECQ01178428.1.p1	XP_024217849.1	0.69925
GECQ01184661.1.p1	XP_024219706.1	1.45722
GECQ01184661.1.p1	XP_024219685.1	1.45722
GECQ01459272.1.p1	XP_014292403.1	1.07152
GECQ01268178.1.p1	XP_014277853.1	1.05924
GECQ01023075.1.p1	XP_024215931.1	0.90826
GECQ01278507.1.p1	XP_024215046.1	1.45722
GECQ01453461.1.p1	XP_014271633.1	0.4163
GECQ01457402.1.p1	XP_014277222.1	1.03468
GECQ01188937.1.p1	XP_024219680.1	0.3645
GECQ01100738.1.p1	XP_024215145.1	1.45722
GECQ01100738.1.p1	XP_014272238.1	1.45722
GECQ01100738.1.p1	XP_014272237.1	1.45722
GECQ01100738.1.p1	XP_014272236.1	1.45722
GECQ01100738.1.p1	XP_014272235.1	1.45722
GECQ01100738.1.p1	XP_014272233.1	1.45722
GECQ01100738.1.p1	XP_014272232.1	1.45722
GECQ01045633.1.p1	XP_014280277.1	0.95245
GECQ01314427.1.p1	XP_014290252.1	1.45722
GECQ01175858.1.p2	XP_014272603.1	0.72522
GECQ01063848.1.p1	XP_014270679.1	1.45722
GECQ01063848.1.p1	XP_014270678.1	1.45722
GECQ01353862.1.p2	XP_014286060.1	1.45722
GECQ01232414.1.p1	XP_024214700.1	0.262
GECQ01440634.1.p1	XP_024216739.1	0.3246
GECQ01255865.1.p1	XP_014278474.1	1.09704
GECQ01479741.1.p1	XP_014271688.1	1.45722
GECQ01479741.1.p1	XP_014271687.1	1.45722
GECQ01212120.1.p1	XP_014284933.1	1.12587
GECQ01149082.1.p1	XP_024216203.1	1.44568
GECQ01149082.1.p1	XP_024216202.1	1.44568
GECQ01149082.1.p1	XP_024216201.1	1.44568
GECQ01131408.1.p1	XP_024214827.1	1.45722
GECQ01131408.1.p1	XP_024214826.1	1.45722
GECQ01131408.1.p1	XP_024214825.1	1.45722
GECQ01131408.1.p1	XP_024214824.1	1.45722
GECQ01173450.1.p1	XP_014284759.1	0.3407
GECQ01205750.1.p1	XP_014292124.1	0.3804
GECQ01455156.1.p1	XP_024218542.1	1.45722
GECQ01106207.1.p1	XP_014286918.1	1.45722
GECQ01493936.1.p1	XP_014283694.1	0.46592
GECQ01317929.1.p1	XP_014284159.1	0.53623
GECQ01226185.1.p1	XP_014291324.1	0.82383
GECQ01472633.1.p1	XP_014279809.1	0.6247
GECQ01286551.1.p3	XP_014283855.1	0.4393
GECQ01275469.1.p1	XP_014276915.1	0.59988
GECQ01487496.1.p1	XP_014278646.1	0.48766
GECQ01498974.1.p1	XP_014289953.1	0.53087
GECQ01148246.1.p1	XP_024218535.1	0.80816
GECQ01296303.1.p1	XP_014287370.1	0.87242
GECQ01411641.1.p1	XP_014274549.1	0.1601
GECQ01417924.1.p1	XP_014271427.1	1.21624
GECQ01317651.1.p1	XP_024219642.1	1.45722
GECQ01420982.1.p1	XP_024217848.1	1.45722
GECQ01420982.1.p1	XP_024217847.1	1.45722
GECQ01422826.1.p1	XP_024220066.1	0.4163
GECQ01329752.1.p1	XP_014271925.1	1.45722
GECQ01329752.1.p1	XP_014271924.1	1.45722
GECQ01329752.1.p1	XP_014271922.1	1.45722
GECQ01192461.1.p1	XP_014275781.1	1.45722
GECQ01192461.1.p1	XP_014275780.1	1.45722
GECQ01188162.1.p1	XP_014287774.1	0.85077
GECQ01494063.1.p1	XP_014285960.1	1.04174
GECQ01494063.1.p1	XP_014285959.1	1.04174
GECQ01494063.1.p1	XP_014285958.1	1.04174
GECQ01196290.1.p1	XP_024214218.1	0.47592
GECQ01391040.1.p1	XP_014287078.1	1.45722
GECQ01113439.1.p2	XP_014282824.1	0.3971
GECQ01421560.1.p1	XP_014288711.2	1.45722
GECQ01454318.1.p1	XP_014294421.1	0.86359
GECQ01454318.1.p1	XP_014294420.1	0.86359
GECQ01454318.1.p1	XP_014294419.1	0.86359
GECQ01170514.1.p1	XP_024215582.1	0.4219
GECQ01103088.1.p1	XP_014283549.1	0.6824
GECQ01103088.1.p1	XP_014283548.1	0.6824
GECQ01103088.1.p1	XP_014283547.1	0.6824
GECQ01103088.1.p1	XP_014283546.1	0.6824
GECQ01103088.1.p1	XP_014283545.1	0.6824
GECQ01190102.1.p1	XP_014283381.1	1.06885
GECQ01004703.1.p1	XP_014279570.1	0.55898
GECQ01019943.1.p2	XP_014278867.1	1.26661
GECQ01262207.1.p1	XP_014290831.1	1.10737
GECQ01205447.1.p1	XP_014279343.2	1.45722
GECQ01027183.1.p1	XP_024218923.1	1.45722
GECQ01192788.1.p1	XP_014287971.1	1.03303
GECQ01192788.1.p1	XP_014287970.1	1.03303
GECQ01192788.1.p1	XP_014287969.1	1.03303
GECQ01155487.1.p1	XP_014293413.1	1.17815
GECQ01322873.1.p1	XP_014276029.1	1.45722
GECQ01009309.1.p1	XP_014279440.1	0.48441
GECQ01338004.1.p1	XP_024215375.1	1.45722
GECQ01338004.1.p1	XP_024215374.1	1.45722
GECQ01338004.1.p1	XP_024215373.1	1.45722
GECQ01338004.1.p1	XP_024215372.1	1.45722
GECQ01338004.1.p1	XP_014280216.1	1.45722
GECQ01196330.1.p1	XP_014278947.1	1.1877
GECQ01521540.1.p1	XP_014280584.1	1.40534
GECQ01319798.1.p1	XP_014275852.1	0.2034
GECQ01385666.1.p1	XP_014286229.1	1.45722
GECQ01385666.1.p1	XP_014286228.1	1.45722
GECQ01311337.1.p1	XP_014270463.1	0.80267
GECQ01061346.1.p1	XP_024214856.1	0.0906
GECQ01230789.1.p1	XP_024218332.1	0.2074
GECQ01186717.1.p1	XP_024215671.1	1.45722
GECQ01186717.1.p1	XP_014275190.1	1.45722
GECQ01186717.1.p1	XP_014275189.1	1.45722
GECQ01118043.1.p2	XP_014277738.1	0.3479
GECQ01484983.1.p1	XP_014280092.1	0.62656
GECQ01484983.1.p1	XP_014280091.1	0.62656
GECQ01484983.1.p1	XP_014280090.1	0.62656
GECQ01484983.1.p1	XP_014280089.1	0.62656
GECQ01317653.1.p1	XP_024219642.1	1.45722
GECQ01139092.1.p1	XP_014274116.1	0.59832
GECQ01139092.1.p1	XP_014274115.1	0.59832
GECQ01139092.1.p1	XP_014274114.1	0.59832
GECQ01139092.1.p1	XP_014274113.1	0.59832
GECQ01230284.1.p1	XP_014274933.1	0.80289
GECQ01369848.1.p2	XP_024215805.1	0.0875
GECQ01000279.1.p1	XP_014271241.1	0.232
GECQ01515005.1.p2	XP_024217648.1	0.72944
GECQ01378336.1.p1	XP_024218814.1	1.45722
GECQ01304002.1.p1	XP_014272472.1	1.36578
GECQ01304002.1.p1	XP_014272464.1	1.36578
GECQ01304002.1.p1	XP_014272458.1	1.36578
GECQ01165726.1.p1	XP_024218123.1	0.4061
GECQ01165726.1.p1	XP_024218122.1	0.4061
GECQ01211747.1.p1	XP_014290848.1	0.2606
GECQ01516927.1.p1	XP_014272861.1	1.45722
GECQ01516927.1.p1	XP_014272859.1	1.45722
GECQ01516927.1.p1	XP_014272858.1	1.45722
GECQ01516927.1.p1	XP_014272857.1	1.45722
GECQ01516927.1.p1	XP_014272856.1	1.45722
GECQ01516927.1.p1	XP_014272855.1	1.45722
GECQ01473537.1.p1	XP_014289066.1	1.45722
GECQ01473537.1.p1	XP_014289065.1	1.45722
GECQ01115543.1.p1	XP_014284340.1	1.17798
GECQ01115543.1.p1	XP_014284338.1	1.17798
GECQ01350568.1.p1	XP_014275154.1	0.80418
GECQ01203993.1.p1	XP_014281989.1	1.45722
GECQ01494460.1.p1	XP_014280760.1	1.01129
GECQ01090308.1.p1	XP_024219235.1	1.45722
GECQ01090308.1.p1	XP_024218994.1	1.45722
GECQ01090308.1.p1	XP_024218993.1	1.45722
GECQ01090308.1.p1	XP_024216565.1	1.45722
GECQ01090308.1.p1	XP_024216564.1	1.45722
GECQ01193094.1.p1	XP_014293191.1	0.97294
GECQ01193094.1.p1	XP_014293190.1	0.97294
GECQ01110271.1.p1	XP_024215739.1	1.45722
GECQ01208331.1.p1	XP_014274634.2	0.59068
GECQ01363990.1.p1	XP_014274466.1	1.08047
GECQ01262261.1.p1	XP_014289107.1	0.57971
GECQ01264276.1.p1	XP_024215467.1	1.45722
GECQ01264276.1.p1	XP_024215466.1	1.45722
GECQ01264276.1.p1	XP_024215465.1	1.45722
GECQ01264276.1.p1	XP_024215464.1	1.45722
GECQ01149743.1.p1	XP_014284692.1	1.45722
GECQ01070975.1.p1	XP_014279674.1	0.50413
GECQ01222255.1.p1	XP_024215944.1	1.45722
GECQ01130525.1.p2	XP_014292734.1	0.78461
GECQ01435583.1.p1	XP_014284727.1	0.77157
GECQ01142179.1.p1	XP_024216758.1	1.45722
GECQ01174239.1.p1	XP_014271683.1	0.57994
GECQ01137018.1.p1	XP_024216139.1	1.45722
GECQ01137018.1.p1	XP_014294600.1	1.45722
GECQ01344973.1.p1	XP_014279140.1	0.7021
GECQ01486414.1.p1	XP_024218203.1	1.45722
GECQ01486414.1.p1	XP_024217753.1	1.45722
GECQ01303534.1.p1	XP_014285712.1	1.45722
GECQ01303534.1.p1	XP_014285710.1	1.45722
GECQ01369832.1.p1	XP_014289576.1	0.2724
GECQ01154183.1.p1	XP_014293540.1	1.39896
GECQ01484885.1.p1	XP_014284480.1	1.45722
GECQ01484885.1.p1	XP_014284479.1	1.45722
GECQ01025665.1.p2	XP_014273447.1	0.4272
GECQ01193602.1.p1	XP_024216462.1	1.45722
GECQ01193602.1.p1	XP_024216461.1	1.45722
GECQ01029913.1.p2	XP_014283991.1	0.5378
GECQ01423492.1.p2	XP_024215641.1	1.45722
GECQ01506039.1.p1	XP_014270219.1	1.45722
GECQ01506039.1.p1	XP_014270218.1	1.45722
GECQ01506039.1.p1	XP_014270217.1	1.45722
GECQ01506039.1.p1	XP_014270216.1	1.45722
GECQ01506039.1.p1	XP_014270215.1	1.45722
GECQ01097116.1.p1	XP_024216603.1	1.45722
GECQ01097116.1.p1	XP_024216602.1	1.45722
GECQ01097116.1.p1	XP_014278934.1	1.45722
GECQ01097116.1.p1	XP_014278933.1	1.45722
GECQ01193349.1.p2	XP_014283972.1	0.2551
GECQ01336092.1.p1	XP_014273735.1	1.39705
GECQ01087026.1.p1	XP_014276265.1	1.3578
GECQ01132072.1.p1	XP_014274368.1	0.53758
GECQ01366079.1.p1	XP_014277793.1	1.45722
GECQ01152952.1.p2	XP_014292364.1	0.1047
GECQ01013708.1.p1	XP_014270316.1	0.81892
GECQ01041138.1.p1	XP_024214272.1	1.45722
GECQ01041138.1.p1	XP_024214271.1	1.45722
GECQ01201172.1.p1	XP_014283183.1	1.04265
GECQ01416253.1.p1	XP_024216744.1	1.45722
GECQ01503219.1.p1	XP_014282297.1	0.99906
GECQ01423051.1.p2	XP_024215144.1	0.66485
GECQ01457732.1.p1	XP_024214050.1	1.45722
GECQ01223945.1.p1	XP_014285583.1	0.1107
GECQ01163809.1.p1	XP_014282670.2	1.45722
GECQ01089994.1.p1	XP_014283062.1	0.2258
GECQ01017008.1.p1	XP_014271559.1	0.48718
GECQ01340634.1.p1	XP_024215723.1	1.45722
GECQ01340634.1.p1	XP_024215721.1	1.45722
GECQ01340634.1.p1	XP_024215720.1	1.45722
GECQ01340634.1.p1	XP_024215719.1	1.45722
GECQ01340634.1.p1	XP_014282272.1	1.45722
GECQ01340634.1.p1	XP_014282271.1	1.45722
GECQ01340634.1.p1	XP_014282270.1	1.45722
GECQ01170005.1.p1	XP_014293651.1	0.127
GECQ01136073.1.p1	XP_024214828.1	1.22484
GECQ01250621.1.p1	XP_014290156.1	0.3409
GECQ01250621.1.p1	XP_014290155.1	0.3409
GECQ01250621.1.p1	XP_014290154.1	0.3409
GECQ01363288.1.p1	XP_024216613.1	1.51398
GECQ01449731.1.p1	XP_014284233.1	1.45722
GECQ01178085.1.p1	XP_014289492.1	0.3988
GECQ01121972.1.p1	XP_024215345.1	1.45722
GECQ01121972.1.p1	XP_014286736.1	1.45722
GECQ01121972.1.p1	XP_014286733.1	1.45722
GECQ01487436.1.p1	XP_024218395.1	0.77269
GECQ01187082.1.p1	XP_014294055.1	0.70058
GECQ01045223.1.p1	XP_014273940.1	0.78332
GECQ01310451.1.p1	XP_014270826.1	0.1302
GECQ01314998.1.p1	XP_014289774.1	1.45722
GECQ01314998.1.p1	XP_014289772.1	1.45722
GECQ01314998.1.p1	XP_014289771.1	1.45722
GECQ01314998.1.p1	XP_014289770.1	1.45722
GECQ01053489.1.p1	XP_014283463.1	1.45722
GECQ01053489.1.p1	XP_014283462.1	1.45722
GECQ01053489.1.p1	XP_014283461.1	1.45722
GECQ01053489.1.p1	XP_014283460.1	1.45722
GECQ01053489.1.p1	XP_014283459.1	1.45722
GECQ01053489.1.p1	XP_014283458.1	1.45722
GECQ01243552.1.p1	XP_014283543.1	1.45722
GECQ01510292.1.p1	XP_024217941.1	1.45722
GECQ01510292.1.p1	XP_024217940.1	1.45722
GECQ01510292.1.p1	XP_024217939.1	1.45722
GECQ01510292.1.p1	XP_024217938.1	1.45722
GECQ01510292.1.p1	XP_024217937.1	1.45722
GECQ01510292.1.p1	XP_024217936.1	1.45722
GECQ01050818.1.p1	XP_014276366.1	1.45722
GECQ01050818.1.p1	XP_014276365.1	1.45722
GECQ01050818.1.p1	XP_014276364.1	1.45722
GECQ01286552.1.p3	XP_014283855.1	0.4393
GECQ01304783.1.p1	XP_014277816.1	1.45722
GECQ01304783.1.p1	XP_014277815.1	1.45722
GECQ01304783.1.p1	XP_014277813.1	1.45722
GECQ01304783.1.p1	XP_014277812.1	1.45722
GECQ01430952.1.p1	XP_014291110.1	0.2914
GECQ01430952.1.p1	XP_014291109.1	0.2914
GECQ01202136.1.p1	XP_014271831.1	0.49489
GECQ01328413.1.p1	XP_014279557.1	0.3211
GECQ01457621.1.p1	XP_014289258.1	0.1735
GECQ01234335.1.p1	XP_014271685.1	1.45722
GECQ01147833.1.p1	XP_024216883.1	1.45722
GECQ01147833.1.p1	XP_014275890.1	1.45722
GECQ01147833.1.p1	XP_014275881.1	1.45722
GECQ01147833.1.p1	XP_014275871.1	1.45722
GECQ01016837.1.p1	XP_014283267.1	0.3652
GECQ01424663.1.p1	XP_014282051.1	0.85401
GECQ01424663.1.p1	XP_014282050.1	0.85401
GECQ01118743.1.p1	XP_014286124.1	1.45722
GECQ01118743.1.p1	XP_014286123.1	1.45722
GECQ01385401.1.p1	XP_014287034.1	1.45722
GECQ01378815.1.p1	XP_014285131.1	1.45722
GECQ01378815.1.p1	XP_014285130.1	1.45722
GECQ01378815.1.p1	XP_014285129.1	1.45722
GECQ01378815.1.p1	XP_014285128.1	1.45722
GECQ01456274.1.p1	XP_014289048.1	0.81294
GECQ01204146.1.p1	XP_014289670.1	0.93674
GECQ01344351.1.p1	XP_014284545.1	0.49268
GECQ01192203.1.p1	XP_014271100.1	0.47844
GECQ01178178.1.p1	XP_014274391.1	1.44666
GECQ01191607.1.p2	XP_014280439.1	1.45722
GECQ01505964.1.p1	XP_024217216.1	1.00317
GECQ01128138.1.p1	XP_014286818.1	0.8821
GECQ01341403.1.p1	XP_014274208.1	0.52891
GECQ01226455.1.p1	XP_014288564.1	1.45722
GECQ01259567.1.p1	XP_014272450.1	1.45722
GECQ01259567.1.p1	XP_014272449.1	1.45722
GECQ01259567.1.p1	XP_014272448.1	1.45722
GECQ01073813.1.p1	XP_024218714.1	1.45722
GECQ01483898.1.p1	XP_014279805.1	1.45722
GECQ01216904.1.p1	XP_024217570.1	0.66672
GECQ01168523.1.p1	XP_024218136.1	1.45722
GECQ01168523.1.p1	XP_024218135.1	1.45722
GECQ01168523.1.p1	XP_024218134.1	1.45722
GECQ01168523.1.p1	XP_024218133.1	1.45722
GECQ01168523.1.p1	XP_024218132.1	1.45722
GECQ01168523.1.p1	XP_024218131.1	1.45722
GECQ01168523.1.p1	XP_024218130.1	1.45722
GECQ01168523.1.p1	XP_024218128.1	1.45722
GECQ01166107.1.p1	XP_014277719.1	1.45722
GECQ01166107.1.p1	XP_014277718.1	1.45722
GECQ01166107.1.p1	XP_014277716.1	1.45722
GECQ01166107.1.p1	XP_014277715.1	1.45722
GECQ01166107.1.p1	XP_014277714.1	1.45722
GECQ01166107.1.p1	XP_014277713.1	1.45722
GECQ01166107.1.p1	XP_014277712.1	1.45722
GECQ01166107.1.p1	XP_014277711.1	1.45722
GECQ01166107.1.p1	XP_014277710.1	1.45722
GECQ01166107.1.p1	XP_014277709.1	1.45722
GECQ01166107.1.p1	XP_014277708.1	1.45722
GECQ01166107.1.p1	XP_014277707.1	1.45722
GECQ01405063.1.p2	XP_014273931.1	0.47391
GECQ01076713.1.p1	XP_014294170.1	1.1296
GECQ01477634.1.p2	XP_024217134.1	0.55571
GECQ01228384.1.p1	XP_014287285.1	1.45722
GECQ01228384.1.p1	XP_014287284.1	1.45722
GECQ01193631.1.p1	XP_014283721.1	1.45722
GECQ01193631.1.p1	XP_014283718.1	1.45722
GECQ01392207.1.p1	XP_014274685.1	1.45722
GECQ01392207.1.p1	XP_014274684.1	1.45722
GECQ01392207.1.p1	XP_014274683.1	1.45722
GECQ01062728.1.p1	XP_024214418.1	0.88383
GECQ01432764.1.p1	XP_014276240.1	0.49407
GECQ01432764.1.p1	XP_014276239.1	0.49407
GECQ01486488.1.p1	XP_014285107.1	1.32304
GECQ01037336.1.p1	XP_014285072.1	0.77161
GECQ01270860.1.p1	XP_014285142.1	1.45722
GECQ01270860.1.p1	XP_014285141.1	1.45722
GECQ01028902.1.p1	XP_014281183.2	0.3838
GECQ01347594.1.p1	XP_014276575.1	1.45722
GECQ01347594.1.p1	XP_014276574.1	1.45722
GECQ01075876.1.p3	XP_014285696.1	0.61185
GECQ01358513.1.p1	XP_024217266.1	0.3335
GECQ01149094.1.p1	XP_014294637.1	0.2857
GECQ01130580.1.p1	XP_014281236.1	0.339
GECQ01130580.1.p1	XP_014281235.1	0.339
GECQ01489670.1.p1	XP_014292472.1	1.45722
GECQ01489670.1.p1	XP_014292466.1	1.45722
GECQ01489670.1.p1	XP_014292461.1	1.45722
GECQ01155934.1.p1	XP_014288012.1	1.45722
GECQ01029555.1.p2	XP_024215674.1	1.45722
GECQ01171424.1.p1	XP_014285116.1	1.45722
GECQ01171424.1.p1	XP_014285115.1	1.45722
GECQ01171424.1.p1	XP_014285114.1	1.45722
GECQ01171424.1.p1	XP_014285113.1	1.45722
GECQ01171424.1.p1	XP_014285112.1	1.45722
GECQ01171424.1.p1	XP_014285111.1	1.45722
GECQ01171424.1.p1	XP_014285109.1	1.45722
GECQ01157614.1.p1	XP_014282210.1	1.06366
GECQ01160465.1.p1	XP_014279601.1	1.0289
GECQ01360981.1.p1	XP_014284132.1	0.3098
GECQ01248317.1.p1	XP_014294685.1	1.45722
GECQ01196843.1.p1	XP_014294706.1	1.45722
GECQ01196843.1.p1	XP_014294705.1	1.45722
GECQ01196843.1.p1	XP_014294704.1	1.45722
GECQ01196843.1.p1	XP_014294703.1	1.45722
GECQ01196843.1.p1	XP_014294702.1	1.45722
GECQ01196843.1.p1	XP_014294701.1	1.45722
GECQ01211909.1.p1	XP_014282217.1	1.04623
GECQ01387740.1.p1	XP_024216580.1	1.45722
GECQ01387740.1.p1	XP_024216578.1	1.45722
GECQ01387740.1.p1	XP_024216577.1	1.45722
GECQ01387740.1.p1	XP_024216575.1	1.45722
GECQ01387740.1.p1	XP_024216570.1	1.45722
GECQ01387740.1.p1	XP_014270266.1	1.45722
GECQ01387740.1.p1	XP_014270265.1	1.45722
GECQ01202579.1.p1	XP_014293298.1	1.45722
GECQ01202579.1.p1	XP_014293297.1	1.45722
GECQ01202579.1.p1	XP_014292327.1	1.45722
GECQ01202579.1.p1	XP_014292326.1	1.45722
GECQ01361592.1.p1	XP_014271067.1	1.45722
GECQ01166929.1.p1	XP_014283158.1	0.68739
GECQ01517903.1.p1	XP_014273437.1	0.66209
GECQ01207235.1.p1	XP_014285842.1	1.2286
GECQ01491472.1.p1	XP_014280678.1	1.07332
GECQ01491472.1.p1	XP_014280677.1	1.07332
GECQ01491472.1.p1	XP_014280676.1	1.07332
GECQ01404873.1.p1	XP_014277899.1	1.14542
GECQ01404873.1.p1	XP_014277898.1	1.14542
GECQ01191679.1.p2	XP_024215378.1	1.45722
GECQ01212564.1.p1	XP_014275025.1	0.78719
GECQ01212564.1.p1	XP_014274953.1	0.78719
GECQ01515101.1.p1	XP_014283655.1	0.4501
GECQ01504400.1.p1	XP_024214617.1	1.27915
GECQ01207013.1.p1	XP_024217980.1	1.45722
GECQ01207013.1.p1	XP_024217975.1	1.45722
GECQ01322768.1.p1	XP_014273609.1	0.89245
GECQ01277781.1.p1	XP_014288290.1	0.47785
GECQ01138312.1.p1	XP_024218402.1	1.45722
GECQ01117203.1.p1	XP_014272328.1	1.45722
GECQ01117203.1.p1	XP_014272327.1	1.45722
GECQ01518378.1.p1	XP_014288266.1	1.45722
GECQ01518378.1.p1	XP_014288265.1	1.45722
GECQ01518378.1.p1	XP_014288264.1	1.45722
GECQ01518378.1.p1	XP_014288263.1	1.45722
GECQ01518378.1.p1	XP_014288262.1	1.45722
GECQ01518378.1.p1	XP_014288260.1	1.45722
GECQ01466539.1.p1	XP_024217478.1	1.37487
GECQ01466539.1.p1	XP_014278774.1	1.37487
GECQ01148497.1.p1	XP_014273691.1	1.45722
GECQ01425912.1.p1	XP_014279144.1	1.12027
GECQ01160800.1.p1	XP_014288385.1	1.45722
GECQ01160557.1.p1	XP_014275130.1	0.59476
GECQ01160557.1.p1	XP_014275124.1	0.59476
GECQ01160557.1.p1	XP_014275117.1	0.59476
GECQ01237249.1.p1	XP_014291555.1	1.45722
GECQ01104965.1.p1	XP_014284742.1	1.45722
GECQ01104965.1.p1	XP_014284741.1	1.45722
GECQ01104965.1.p1	XP_014284740.1	1.45722
GECQ01104965.1.p1	XP_014284739.1	1.45722
GECQ01104965.1.p1	XP_014284738.1	1.45722
GECQ01104965.1.p1	XP_014284737.1	1.45722
GECQ01094692.1.p1	XP_014290772.1	1.45722
GECQ01094692.1.p1	XP_014290771.1	1.45722
GECQ01221557.1.p1	XP_024219039.1	1.45722
GECQ01008135.1.p1	XP_024215163.1	1.45722
GECQ01008135.1.p1	XP_024215162.1	1.45722
GECQ01008135.1.p1	XP_024215161.1	1.45722
GECQ01516786.1.p1	XP_014274867.1	0.2537
GECQ01148237.1.p1	XP_014289815.1	1.45722
GECQ01436007.1.p1	XP_014280887.1	1.07335
GECQ01436007.1.p1	XP_014280886.1	1.07335
GECQ01436007.1.p1	XP_014280885.1	1.07335
GECQ01196043.1.p1	XP_024215426.1	1.45722
GECQ01448979.1.p1	XP_024215845.1	1.45722
GECQ01448979.1.p1	XP_024215844.1	1.45722
GECQ01215736.1.p1	XP_014293962.1	0.72321
GECQ01086720.1.p2	XP_014290479.1	0.55129
GECQ01201831.1.p1	XP_014290849.1	1.45722
GECQ01395567.1.p1	XP_024215842.1	0.2111
GECQ01152366.1.p2	XP_014293709.1	0.2564
GECQ01152366.1.p2	XP_014293708.1	0.2564
GECQ01186481.1.p1	XP_024219330.1	1.45722
GECQ01299817.1.p1	XP_014288082.1	1.45722
GECQ01115051.1.p1	XP_014277251.1	1.10827
GECQ01210353.1.p1	XP_014294459.1	1.45722
GECQ01210353.1.p1	XP_014294450.1	1.45722
GECQ01210353.1.p1	XP_014294441.1	1.45722
GECQ01049433.1.p1	XP_014289791.1	0.3364
GECQ01466746.1.p1	XP_014272641.1	0.79109
GECQ01330573.1.p1	XP_024217483.1	1.45722
GECQ01330573.1.p1	XP_024217482.1	1.45722
GECQ01330573.1.p1	XP_024217481.1	1.45722
GECQ01330573.1.p1	XP_024217480.1	1.45722
GECQ01330573.1.p1	XP_024217479.1	1.45722
GECQ01191954.1.p1	XP_024219526.1	0.4481
GECQ01513230.1.p1	XP_014282866.1	0.3478
GECQ01256960.1.p1	XP_014284137.1	1.45722
GECQ01099122.1.p1	XP_024216074.1	1.45722
GECQ01099122.1.p1	XP_014291796.1	1.45722
GECQ01099122.1.p1	XP_014291794.1	1.45722
GECQ01099122.1.p1	XP_014291793.1	1.45722
GECQ01099122.1.p1	XP_014291792.1	1.45722
GECQ01099122.1.p1	XP_014291791.1	1.45722
GECQ01099122.1.p1	XP_014291790.1	1.45722
GECQ01099122.1.p1	XP_014291789.1	1.45722
GECQ01099122.1.p1	XP_014291788.1	1.45722
GECQ01511878.1.p1	XP_014275047.1	1.45722
GECQ01124680.1.p1	XP_024217354.1	0.2795
GECQ01512890.1.p1	XP_014286884.1	0.68794
GECQ01028917.1.p1	XP_014286699.1	1.45722
GECQ01028917.1.p1	XP_014286697.1	1.45722
GECQ01453638.1.p1	XP_014278965.1	1.30986
GECQ01453638.1.p1	XP_014278964.1	1.30986
GECQ01374993.1.p1	XP_014282856.1	0.1741
GECQ01248795.1.p1	XP_014286059.1	0.1984
GECQ01438639.1.p1	XP_014293927.1	0.73885
GECQ01418594.1.p1	XP_014277062.1	1.45722
GECQ01458149.1.p1	XP_024215538.1	0.77851
GECQ01458149.1.p1	XP_014294384.1	0.77851
GECQ01458149.1.p1	XP_014294383.1	0.77851
GECQ01458149.1.p1	XP_014294382.1	0.77851
GECQ01458149.1.p1	XP_014294381.1	0.77851
GECQ01034091.1.p1	XP_024219027.1	1.0761
GECQ01269492.1.p1	XP_014293901.1	0.4487
GECQ01392209.1.p1	XP_014274685.1	1.45722
GECQ01392209.1.p1	XP_014274684.1	1.45722
GECQ01392209.1.p1	XP_014274683.1	1.45722
GECQ01413634.1.p1	XP_024217928.1	1.27582
GECQ01413634.1.p1	XP_024217927.1	1.27582
GECQ01224131.1.p1	XP_014274976.1	0.2491
GECQ01372443.1.p1	XP_024217519.1	1.31061
GECQ01369202.1.p1	XP_024216963.1	0.9745
GECQ01093580.1.p2	XP_024215084.1	0.2351
GECQ01116286.1.p1	XP_024216972.1	1.45722
GECQ01116286.1.p1	XP_024216971.1	1.45722
GECQ01116286.1.p1	XP_024216970.1	1.45722
GECQ01116286.1.p1	XP_024216969.1	1.45722
GECQ01320496.1.p1	XP_014286231.1	0.70462
GECQ01320496.1.p1	XP_014286230.1	0.70462
GECQ01338009.1.p1	XP_024215375.1	1.45722
GECQ01338009.1.p1	XP_024215374.1	1.45722
GECQ01338009.1.p1	XP_024215373.1	1.45722
GECQ01338009.1.p1	XP_024215372.1	1.45722
GECQ01338009.1.p1	XP_014280216.1	1.45722
GECQ01376162.1.p1	XP_014290018.1	0.88006
GECQ01429730.1.p1	XP_024219180.1	1.19273
GECQ01160485.1.p2	XP_024216462.1	1.45722
GECQ01160485.1.p2	XP_024216461.1	1.45722
GECQ01185433.1.p1	XP_014276522.1	0.2288
GECQ01379738.1.p1	XP_014278894.1	1.32469
GECQ01182215.1.p1	XP_024216907.1	1.45722
GECQ01472386.1.p2	XP_024218638.1	0.55355
GECQ01152469.1.p1	XP_014281897.1	1.44056
GECQ01423183.1.p1	XP_024217949.1	0.4607
GECQ01187578.1.p1	XP_024215567.1	1.45722
GECQ01310177.1.p1	XP_014277987.1	1.45722
GECQ01310177.1.p1	XP_014277986.1	1.45722
GECQ01310177.1.p1	XP_014277985.1	1.45722
GECQ01494295.1.p1	XP_024216857.1	0.1621
GECQ01343519.1.p1	XP_014287568.1	1.45722
GECQ01054337.1.p1	XP_014288750.1	1.45722
GECQ01000361.1.p1	XP_024218712.1	1.45722
GECQ01000361.1.p1	XP_024216304.1	1.45722
GECQ01000361.1.p1	XP_024214270.1	1.45722
GECQ01000361.1.p1	XP_024214269.1	1.45722
GECQ01000361.1.p1	XP_024214268.1	1.45722
GECQ01000361.1.p1	XP_024214267.1	1.45722
GECQ01000361.1.p1	XP_024214266.1	1.45722
GECQ01000361.1.p1	XP_024214265.1	1.45722
GECQ01000361.1.p1	XP_024214264.1	1.45722
GECQ01000361.1.p1	XP_024214263.1	1.45722
GECQ01000361.1.p1	XP_014284130.1	1.45722
GECQ01000361.1.p1	XP_014280457.1	1.45722
GECQ01000361.1.p1	XP_014276767.1	1.45722
GECQ01000361.1.p1	XP_014276766.1	1.45722
GECQ01172041.1.p1	XP_014275370.1	1.10649
GECQ01024405.1.p1	XP_014292448.1	0.50064
GECQ01170573.1.p1	XP_014291830.1	1.09069
GECQ01323026.1.p1	XP_024219756.1	1.45722
GECQ01323026.1.p1	XP_014276709.1	1.45722
GECQ01323026.1.p1	XP_014276708.1	1.45722
GECQ01323026.1.p1	XP_014276707.1	1.45722
GECQ01323026.1.p1	XP_014276706.1	1.45722
GECQ01323026.1.p1	XP_014276705.1	1.45722
GECQ01323026.1.p1	XP_014276704.1	1.45722
GECQ01400897.1.p2	XP_024216793.1	0.2522
GECQ01400897.1.p2	XP_024216792.1	0.2522
GECQ01136196.1.p1	XP_014288760.1	0.5441
GECQ01316628.1.p1	XP_024217701.1	0.66447
GECQ01379161.1.p1	XP_014277405.1	1.45722
GECQ01379161.1.p1	XP_014277404.1	1.45722
GECQ01211293.1.p1	XP_014291348.1	0.4626
GECQ01507403.1.p1	XP_014278846.1	1.45722
GECQ01014704.1.p1	XP_024215207.1	1.45722
GECQ01014704.1.p1	XP_024215206.1	1.45722
GECQ01014704.1.p1	XP_024215205.1	1.45722
GECQ01014704.1.p1	XP_024215204.1	1.45722
GECQ01014704.1.p1	XP_024215203.1	1.45722
GECQ01014704.1.p1	XP_024215202.1	1.45722
GECQ01014704.1.p1	XP_024215201.1	1.45722
GECQ01014704.1.p1	XP_024215200.1	1.45722
GECQ01014704.1.p1	XP_014281404.1	1.45722
GECQ01370706.1.p1	XP_024218641.1	0.58666
GECQ01429429.1.p1	XP_024216342.1	1.45722
GECQ01429429.1.p1	XP_024216341.1	1.45722
GECQ01429429.1.p1	XP_024216340.1	1.45722
GECQ01429429.1.p1	XP_024216338.1	1.45722
GECQ01429429.1.p1	XP_024216337.1	1.45722
GECQ01429429.1.p1	XP_024216336.1	1.45722
GECQ01429429.1.p1	XP_024216335.1	1.45722
GECQ01159411.1.p1	XP_024220186.1	0.8128
GECQ01489584.1.p1	XP_014275027.1	1.45722
GECQ01291430.1.p1	XP_014270460.1	1.45722
GECQ01291430.1.p1	XP_014270459.1	1.45722
GECQ01291430.1.p1	XP_014270458.1	1.45722
GECQ01291430.1.p1	XP_014270457.1	1.45722
GECQ01291430.1.p1	XP_014270456.1	1.45722
GECQ01291430.1.p1	XP_014270455.1	1.45722
GECQ01291430.1.p1	XP_014270454.1	1.45722
GECQ01291430.1.p1	XP_014270453.1	1.45722
GECQ01291430.1.p1	XP_014270452.1	1.45722
GECQ01291430.1.p1	XP_014270451.1	1.45722
GECQ01291430.1.p1	XP_014270450.1	1.45722
GECQ01463083.1.p1	XP_024217011.1	1.45722
GECQ01463083.1.p1	XP_014294015.1	1.45722
GECQ01463083.1.p1	XP_014294014.1	1.45722
GECQ01379918.1.p1	XP_024216134.1	1.45722
GECQ01357212.1.p2	XP_014273932.1	0.5437
GECQ01241179.1.p1	XP_014281662.1	1.26041
GECQ01153761.1.p1	XP_014281221.1	1.45722
GECQ01441264.1.p1	XP_024214791.1	1.45722
GECQ01441264.1.p1	XP_024214790.1	1.45722
GECQ01441264.1.p1	XP_014294665.1	1.45722
GECQ01441264.1.p1	XP_014294664.1	1.45722
GECQ01441264.1.p1	XP_014294663.1	1.45722
GECQ01441264.1.p1	XP_014294662.1	1.45722
GECQ01441264.1.p1	XP_014294661.1	1.45722
GECQ01441264.1.p1	XP_014294660.1	1.45722
GECQ01441264.1.p1	XP_014294658.1	1.45722
GECQ01469479.1.p2	XP_024218479.1	1.05549
GECQ01452521.1.p2	XP_014283498.1	0.96114
GECQ01236892.1.p1	XP_024219278.1	1.12302
GECQ01236892.1.p1	XP_024219277.1	1.12302
GECQ01236892.1.p1	XP_024219276.1	1.12302
GECQ01344405.1.p1	XP_014282450.1	0.3819
GECQ01066858.1.p1	XP_024214472.1	1.45722
GECQ01066858.1.p1	XP_024214471.1	1.45722
GECQ01066858.1.p1	XP_014282115.1	1.45722
GECQ01066858.1.p1	XP_014282114.1	1.45722
GECQ01412209.1.p1	XP_014287465.1	1.45722
GECQ01412209.1.p1	XP_014287464.1	1.45722
GECQ01412209.1.p1	XP_014287463.1	1.45722
GECQ01468437.1.p1	XP_014280368.1	0.7608
GECQ01164556.1.p1	XP_014284768.2	1.45722
GECQ01431427.1.p1	XP_014272170.1	0.58299
GECQ01212567.1.p2	XP_014271776.1	1.45722
GECQ01212567.1.p2	XP_014271767.1	1.45722
GECQ01271794.1.p1	XP_014289420.1	1.11446
GECQ01352515.1.p1	XP_024217627.1	1.34496
GECQ01465974.1.p1	XP_014289022.1	0.3419
GECQ01249958.1.p1	XP_024214881.1	1.45722
GECQ01249958.1.p1	XP_024214880.1	1.45722
GECQ01283057.1.p2	XP_024216081.1	1.45722
GECQ01283057.1.p2	XP_024216080.1	1.45722
GECQ01283057.1.p2	XP_024216079.1	1.45722
GECQ01283057.1.p2	XP_024216078.1	1.45722
GECQ01283057.1.p2	XP_024216077.1	1.45722
GECQ01283057.1.p2	XP_024216076.1	1.45722
GECQ01178990.1.p1	XP_014288221.1	1.09758
GECQ01178990.1.p1	XP_014288220.1	1.09758
GECQ01203666.1.p1	XP_014288648.1	0.72629
GECQ01203666.1.p1	XP_014288647.1	0.72629
GECQ01203666.1.p1	XP_014288646.1	0.72629
GECQ01288016.1.p1	XP_014294810.1	0.96653
GECQ01036726.1.p1	XP_014287107.2	1.45722
GECQ01147146.1.p1	XP_014278621.1	0.54544
GECQ01318110.1.p1	XP_014285054.1	1.09752
GECQ01318110.1.p1	XP_014285052.1	1.09752
GECQ01317990.1.p2	XP_014270930.1	1.45722
GECQ01490355.1.p2	XP_014291688.1	0.99076
GECQ01462059.1.p1	XP_014274665.1	1.45722
GECQ01222778.1.p1	XP_014289299.1	1.45722
GECQ01222778.1.p1	XP_014289298.1	1.45722
GECQ01222778.1.p1	XP_014289297.1	1.45722
GECQ01222778.1.p1	XP_014289296.1	1.45722
GECQ01222778.1.p1	XP_014289295.1	1.45722
GECQ01056168.1.p1	XP_014271221.1	1.45722
GECQ01056168.1.p1	XP_014271220.1	1.45722
GECQ01056168.1.p1	XP_014271219.1	1.45722
GECQ01025604.1.p1	XP_014275015.1	0.55022
GECQ01122983.1.p1	XP_014285417.2	0.68752
GECQ01198147.1.p1	XP_024217457.1	1.45722
GECQ01244850.1.p1	XP_024216218.1	0.55004
GECQ01385641.1.p1	XP_014287911.1	0.88947
GECQ01156096.1.p1	XP_014286848.1	0.3708
GECQ01146355.1.p1	XP_014292022.1	0.73343
GECQ01146355.1.p1	XP_014292021.1	0.73343
GECQ01146355.1.p1	XP_014292020.1	0.73343
GECQ01156691.1.p1	XP_014277076.1	1.45722
GECQ01156691.1.p1	XP_014277075.1	1.45722
GECQ01156691.1.p1	XP_014277074.1	1.45722
GECQ01156691.1.p1	XP_014277072.1	1.45722
GECQ01224929.1.p1	XP_014280192.1	1.45722
GECQ01164323.1.p1	XP_014288067.1	0.53589
GECQ01244284.1.p1	XP_014271114.1	0.47513
GECQ01378431.1.p1	XP_014284019.1	1.45722
GECQ01031580.1.p1	XP_014289162.1	1.45722
GECQ01374165.1.p1	XP_014274349.1	1.42144
GECQ01474069.1.p1	XP_024217267.1	0.2318
GECQ01246465.1.p1	XP_014276443.1	0.2664
GECQ01369038.1.p1	XP_014279145.1	1.45722
GECQ01186317.1.p1	XP_024219108.1	0.1678
GECQ01054519.1.p1	XP_014280375.1	0.75179
GECQ01042175.1.p1	XP_014281063.1	0.4144
GECQ01424170.1.p1	XP_014274991.1	0.4549
GECQ01397053.1.p1	XP_024214930.1	1.02109
GECQ01177144.1.p1	XP_014277591.1	1.45722
GECQ01237491.1.p1	XP_014284577.1	1.45722
GECQ01178380.1.p1	XP_024215058.1	1.45722
GECQ01350189.1.p1	XP_014277916.1	0.3258
GECQ01301487.1.p1	XP_024215521.1	1.23149
GECQ01301487.1.p1	XP_014281129.1	1.23149
GECQ01147839.1.p1	XP_024216883.1	1.45722
GECQ01147839.1.p1	XP_014275890.1	1.45722
GECQ01147839.1.p1	XP_014275881.1	1.45722
GECQ01147839.1.p1	XP_014275871.1	1.45722
GECQ01287792.1.p1	XP_014278972.1	0.99586
GECQ01357469.1.p2	XP_014278980.1	1.0132
GECQ01111301.1.p1	XP_014290349.1	1.1142
GECQ01275735.1.p1	XP_014288182.1	0.99312
GECQ01440105.1.p1	XP_014279362.1	0.4536
GECQ01472383.1.p1	XP_024219810.1	0.2653
GECQ01418363.1.p1	XP_014277663.1	0.454
GECQ01114311.1.p1	XP_014290694.1	0.9772
GECQ01508981.1.p2	XP_014283790.1	0.81097
GECQ01223195.1.p2	XP_014275509.1	1.09164
GECQ01223195.1.p2	XP_014275508.1	1.09164
GECQ01129083.1.p1	XP_014272814.1	1.45722
GECQ01137026.1.p1	XP_024216139.1	1.45722
GECQ01137026.1.p1	XP_014294600.1	1.45722
GECQ01136170.1.p2	XP_014290064.1	0.754
GECQ01147416.1.p1	XP_014288280.1	0.78134
GECQ01163065.1.p1	XP_024220087.1	1.01538
GECQ01234976.1.p1	XP_024214478.1	1.45722
GECQ01388131.1.p1	XP_014291361.2	0.85824
GECQ01304248.1.p1	XP_014273582.1	0.97113
GECQ01065605.1.p1	XP_014276262.1	1.45722
GECQ01065605.1.p1	XP_014276260.1	1.45722
GECQ01065605.1.p1	XP_014276259.1	1.45722
GECQ01401026.1.p1	XP_014271423.1	1.45722
GECQ01450580.1.p1	XP_024216737.1	1.45722
GECQ01450580.1.p1	XP_024216715.1	1.45722
GECQ01450580.1.p1	XP_024216660.1	1.45722
GECQ01450580.1.p1	XP_014271213.1	1.45722
GECQ01450580.1.p1	XP_014271212.1	1.45722
GECQ01450580.1.p1	XP_014271211.1	1.45722
GECQ01452063.1.p1	XP_014283223.1	1.21424
GECQ01323205.1.p1	XP_014284725.1	1.45722
GECQ01129577.1.p1	XP_014285832.1	1.30391
GECQ01075449.1.p1	XP_014273838.2	1.45722
GECQ01465536.1.p1	XP_014272611.1	0.51206
GECQ01273068.1.p1	XP_014275816.1	1.45722
GECQ01273068.1.p1	XP_014275815.1	1.45722
GECQ01273068.1.p1	XP_014275814.1	1.45722
GECQ01273068.1.p1	XP_014275813.1	1.45722
GECQ01273068.1.p1	XP_014275812.1	1.45722
GECQ01156386.1.p1	XP_014282481.1	0.4189
GECQ01156386.1.p1	XP_014282480.1	0.4189
GECQ01156386.1.p1	XP_014282479.1	0.4189
GECQ01511210.1.p1	XP_014282329.1	1.45722
GECQ01511210.1.p1	XP_014282328.1	1.45722
GECQ01470303.1.p1	XP_024218478.1	0.77361
GECQ01467236.1.p1	XP_014281358.1	1.28991
GECQ01386562.1.p1	XP_014275294.1	0.86856
GECQ01450313.1.p1	XP_024218646.1	0.71609
GECQ01153141.1.p1	XP_024214653.1	0.48755
GECQ01153141.1.p1	XP_024214652.1	0.48755
GECQ01153141.1.p1	XP_014283191.1	0.48755
GECQ01153141.1.p1	XP_014283190.1	0.48755
GECQ01013706.1.p1	XP_014270316.1	0.81892
GECQ01229834.1.p1	XP_024219130.1	0.49522
GECQ01229834.1.p1	XP_024219129.1	0.49522
GECQ01364553.1.p1	XP_014280191.1	0.376
GECQ01190359.1.p1	XP_014276025.1	1.09696
GECQ01193852.1.p1	XP_024217659.1	1.45722
GECQ01193852.1.p1	XP_014281979.1	1.45722
GECQ01340012.1.p2	XP_014282223.1	0.2216
GECQ01083316.1.p1	XP_014281679.2	0.24
GECQ01189596.1.p1	XP_014277719.1	1.45722
GECQ01189596.1.p1	XP_014277718.1	1.45722
GECQ01189596.1.p1	XP_014277716.1	1.45722
GECQ01189596.1.p1	XP_014277715.1	1.45722
GECQ01189596.1.p1	XP_014277714.1	1.45722
GECQ01189596.1.p1	XP_014277713.1	1.45722
GECQ01189596.1.p1	XP_014277712.1	1.45722
GECQ01189596.1.p1	XP_014277711.1	1.45722
GECQ01189596.1.p1	XP_014277710.1	1.45722
GECQ01189596.1.p1	XP_014277708.1	1.45722
GECQ01189596.1.p1	XP_014277707.1	1.45722
GECQ01135789.1.p1	XP_014278255.1	0.75388
GECQ01058824.1.p1	XP_014277543.1	0.147
GECQ01389035.1.p1	XP_014278747.1	0.49619
GECQ01325125.1.p1	XP_024219185.1	1.45722
GECQ01325125.1.p1	XP_024219122.1	1.45722
GECQ01283972.1.p1	XP_024216392.1	1.45722
GECQ01283972.1.p1	XP_024216391.1	1.45722
GECQ01283972.1.p1	XP_024216390.1	1.45722
GECQ01283972.1.p1	XP_024216389.1	1.45722
GECQ01283972.1.p1	XP_024216388.1	1.45722
GECQ01283972.1.p1	XP_024216387.1	1.45722
GECQ01234980.1.p1	XP_024214478.1	1.45722
GECQ01108315.1.p1	XP_014284916.1	0.2885
GECQ01260024.1.p1	XP_014280509.1	0.74411
GECQ01429445.1.p1	XP_024216341.1	1.45722
GECQ01429445.1.p1	XP_024216340.1	1.45722
GECQ01429445.1.p1	XP_024216339.1	1.45722
GECQ01429445.1.p1	XP_024216338.1	1.45722
GECQ01429445.1.p1	XP_024216337.1	1.45722
GECQ01429445.1.p1	XP_024216336.1	1.45722
GECQ01429445.1.p1	XP_024216335.1	1.45722
GECQ01444364.1.p1	XP_014273119.1	1.35729
GECQ01446118.1.p2	XP_014279930.1	0.72133
GECQ01002444.1.p1	XP_014284999.1	1.45722
GECQ01002444.1.p1	XP_014284998.1	1.45722
GECQ01002444.1.p1	XP_014284997.1	1.45722
GECQ01002444.1.p1	XP_014284995.1	1.45722
GECQ01002444.1.p1	XP_014284994.1	1.45722
GECQ01002444.1.p1	XP_014284993.1	1.45722
GECQ01002444.1.p1	XP_014284992.1	1.45722
GECQ01291651.1.p2	XP_014277071.1	0.357
GECQ01045848.1.p1	XP_014286013.1	1.45722
GECQ01045848.1.p1	XP_014286012.1	1.45722
GECQ01045848.1.p1	XP_014286011.1	1.45722
GECQ01045848.1.p1	XP_014286010.1	1.45722
GECQ01045848.1.p1	XP_014286009.1	1.45722
GECQ01045848.1.p1	XP_014286008.1	1.45722
GECQ01237060.1.p1	XP_014273380.1	1.45722
GECQ01171122.1.p1	XP_014271107.1	0.52646
GECQ01186815.1.p1	XP_014270819.1	1.45722
GECQ01114131.1.p1	XP_014284776.1	0.63418
GECQ01518542.1.p1	XP_024214031.1	1.45722
GECQ01518542.1.p1	XP_024214030.1	1.45722
GECQ01055166.1.p1	XP_024215630.1	1.45722
GECQ01383040.1.p2	XP_014287866.1	0.2681
GECQ01442961.1.p1	XP_014282780.1	0.4408
GECQ01052399.1.p1	XP_014279657.1	0.2072
GECQ01502743.1.p1	XP_024214292.1	0.55804
GECQ01048566.1.p1	XP_024217313.1	1.45722
GECQ01047310.1.p1	XP_014287076.1	0.64678
GECQ01293149.1.p1	XP_014276045.1	0.3811
GECQ01412667.1.p1	XP_014276771.1	1.45722
GECQ01412667.1.p1	XP_014276770.1	1.45722
GECQ01412667.1.p1	XP_014276769.1	1.45722
GECQ01412667.1.p1	XP_014276768.1	1.45722
GECQ01186484.1.p1	XP_024219330.1	1.45722
GECQ01032638.1.p1	XP_014272941.1	0.3597
GECQ01041042.1.p1	XP_024217532.1	0.88849
GECQ01267428.1.p1	XP_014288790.1	0.84776
GECQ01441804.1.p1	XP_014288681.1	0.59873
GECQ01329465.1.p1	XP_014277354.1	0.63563
GECQ01207144.1.p1	XP_024215177.1	1.45722
GECQ01207144.1.p1	XP_014270914.1	1.45722
GECQ01207144.1.p1	XP_014270913.1	1.45722
GECQ01207144.1.p1	XP_014270912.1	1.45722
GECQ01207144.1.p1	XP_014270911.1	1.45722
GECQ01207144.1.p1	XP_014270910.1	1.45722
GECQ01207144.1.p1	XP_014270909.1	1.45722
GECQ01207144.1.p1	XP_014270907.1	1.45722
GECQ01207144.1.p1	XP_014270906.1	1.45722
GECQ01207144.1.p1	XP_014270905.1	1.45722
GECQ01207144.1.p1	XP_014270904.1	1.45722
GECQ01328803.1.p1	XP_014293949.1	1.45722
GECQ01328803.1.p1	XP_014293948.1	1.45722
GECQ01328803.1.p1	XP_014293947.1	1.45722
GECQ01328803.1.p1	XP_014293946.1	1.45722
GECQ01328803.1.p1	XP_014293944.1	1.45722
GECQ01328803.1.p1	XP_014293943.1	1.45722
GECQ01174234.1.p1	XP_014282084.1	1.45722
GECQ01174234.1.p1	XP_014282083.1	1.45722
GECQ01174234.1.p1	XP_014282082.1	1.45722
GECQ01037253.1.p1	XP_014272269.1	1.02496
GECQ01057870.1.p1	XP_014285967.1	0.48975
GECQ01226117.1.p1	XP_024218891.1	1.37847
GECQ01226117.1.p1	XP_024218890.1	1.37847
GECQ01226117.1.p1	XP_024218889.1	1.37847
GECQ01226117.1.p1	XP_024218888.1	1.37847
GECQ01226117.1.p1	XP_024218887.1	1.37847
GECQ01226117.1.p1	XP_014274166.1	1.37847
GECQ01181816.1.p1	XP_014288938.1	1.45722
GECQ01036792.1.p3	XP_014275900.1	0.295
GECQ01038090.1.p1	XP_014281261.1	1.17028
GECQ01328800.1.p1	XP_014293948.1	1.45722
GECQ01328800.1.p1	XP_014293947.1	1.45722
GECQ01328800.1.p1	XP_014293946.1	1.45722
GECQ01328800.1.p1	XP_014293944.1	1.45722
GECQ01328800.1.p1	XP_014293943.1	1.45722
GECQ01467840.1.p1	XP_014293390.2	0.4584
GECQ01131871.1.p2	XP_024215287.1	0.59547
GECQ01131871.1.p2	XP_024215286.1	0.59547
GECQ01203090.1.p1	XP_024214063.1	1.45722
GECQ01203090.1.p1	XP_024214062.1	1.45722
GECQ01203090.1.p1	XP_024214061.1	1.45722
GECQ01203090.1.p1	XP_014276337.1	1.45722
GECQ01495450.1.p1	XP_014279006.1	1.45722
GECQ01079350.1.p1	XP_014294554.1	1.45722
GECQ01079350.1.p1	XP_014294553.1	1.45722
GECQ01300468.1.p1	XP_014278330.1	0.60935
GECQ01460142.1.p1	XP_024218934.1	0.2046
GECQ01504324.1.p1	XP_024217236.1	1.45722
GECQ01154075.1.p1	XP_014294242.1	0.3898
GECQ01103817.1.p1	XP_014291355.1	0.2522
GECQ01119944.1.p1	XP_014288784.1	1.45722
GECQ01119944.1.p1	XP_014288783.1	1.45722
GECQ01387136.1.p1	XP_024215457.1	1.45032
GECQ01200713.1.p1	XP_024215532.1	1.45722
GECQ01161689.1.p2	XP_014282637.1	0.53064
GECQ01405539.1.p1	XP_014287202.1	1.45722
GECQ01256029.1.p1	XP_014274862.2	0.70216
GECQ01002803.1.p1	XP_014279676.1	0.078
GECQ01292761.1.p1	XP_024218485.1	1.45722
GECQ01486324.1.p2	XP_014273239.1	0.51315
GECQ01070973.1.p1	XP_014279674.1	0.50413
GECQ01061492.1.p1	XP_024213999.1	1.31899
GECQ01061492.1.p1	XP_014280167.1	1.31899
GECQ01330686.1.p1	XP_014289450.1	0.592
GECQ01330686.1.p1	XP_014289449.1	0.592
GECQ01330686.1.p1	XP_014289448.1	0.592
GECQ01121973.1.p2	XP_014286739.1	0.3794
GECQ01521670.1.p1	XP_014282591.1	1.45722
GECQ01521670.1.p1	XP_014282589.1	1.45722
GECQ01226426.1.p1	XP_014280466.1	0.252
GECQ01135253.1.p1	XP_024217228.1	1.24037
GECQ01436519.1.p1	XP_024217076.1	1.09115
GECQ01392163.1.p1	XP_014282690.1	1.45722
GECQ01392163.1.p1	XP_014282689.1	1.45722
GECQ01392163.1.p1	XP_014282688.1	1.45722
GECQ01012823.1.p1	XP_014282117.1	1.02923
GECQ01153080.1.p1	XP_014278028.1	1.02471
GECQ01446205.1.p1	XP_014282662.1	0.54635
GECQ01153851.1.p1	XP_014284320.1	1.29093
GECQ01180070.1.p3	XP_014279432.1	0.3949
GECQ01180070.1.p3	XP_014279430.1	0.3949
GECQ01423734.1.p1	XP_014279438.1	1.45722
GECQ01423734.1.p1	XP_014279437.1	1.45722
GECQ01454708.1.p1	XP_014272239.1	0.94161
GECQ01105112.1.p1	XP_024214634.1	1.45722
GECQ01105112.1.p1	XP_024214633.1	1.45722
GECQ01105112.1.p1	XP_024214632.1	1.45722
GECQ01105112.1.p1	XP_024214631.1	1.45722
GECQ01105112.1.p1	XP_024214630.1	1.45722
GECQ01105112.1.p1	XP_024214628.1	1.45722
GECQ01105112.1.p1	XP_024214627.1	1.45722
GECQ01214597.1.p1	XP_024217750.1	0.4414
GECQ01214597.1.p1	XP_014270412.1	0.4414
GECQ01102575.1.p1	XP_014272652.1	0.4604
GECQ01196282.1.p1	XP_024217758.1	0.76582
GECQ01081758.1.p1	XP_014272934.1	0.2117
GECQ01081758.1.p1	XP_014272933.1	0.2117
GECQ01081758.1.p1	XP_014272932.1	0.2117
GECQ01081758.1.p1	XP_014272931.1	0.2117
GECQ01447761.1.p1	XP_014284951.1	1.45722
GECQ01263306.1.p1	XP_014289551.1	0.65422
GECQ01082598.1.p1	XP_014271749.1	0.55529
GECQ01082598.1.p1	XP_014271748.1	0.55529
GECQ01240891.1.p1	XP_014283196.1	0.57785
GECQ01077415.1.p1	XP_014288553.2	1.45722
GECQ01132580.1.p1	XP_014278905.1	0.6344
GECQ01343996.1.p1	XP_014279155.1	0.94188
GECQ01082417.1.p1	XP_014285830.1	1.45722
GECQ01082417.1.p1	XP_014285829.1	1.45722
GECQ01082417.1.p1	XP_014285828.1	1.45722
GECQ01016487.1.p2	XP_014277927.1	1.45722
GECQ01085800.1.p1	XP_014284405.2	1.45722
GECQ01236988.1.p1	XP_014277856.1	1.45722
GECQ01031179.1.p1	XP_014292047.1	0.3491
GECQ01031179.1.p1	XP_014292046.1	0.3491
GECQ01055781.1.p1	XP_014285993.1	1.45722
GECQ01055781.1.p1	XP_014282178.1	1.45722
GECQ01275920.1.p1	XP_014285132.1	0.409
GECQ01489327.1.p1	XP_014277840.1	0.71738
GECQ01162871.1.p1	XP_024215265.1	1.45722
GECQ01162871.1.p1	XP_024215264.1	1.45722
GECQ01162871.1.p1	XP_014287336.1	1.45722
GECQ01162871.1.p1	XP_014287335.1	1.45722
GECQ01162871.1.p1	XP_014287334.1	1.45722
GECQ01162871.1.p1	XP_014287333.1	1.45722
GECQ01162871.1.p1	XP_014287332.1	1.45722
GECQ01162871.1.p1	XP_014287331.1	1.45722
GECQ01162871.1.p1	XP_014287330.1	1.45722
GECQ01162871.1.p1	XP_014287329.1	1.45722
GECQ01162871.1.p1	XP_014287328.1	1.45722
GECQ01162871.1.p1	XP_014287327.1	1.45722
GECQ01162871.1.p1	XP_014287326.1	1.45722
GECQ01162871.1.p1	XP_014287325.1	1.45722
GECQ01162871.1.p1	XP_014287323.1	1.45722
GECQ01162871.1.p1	XP_014287322.1	1.45722
GECQ01162871.1.p1	XP_014287321.1	1.45722
GECQ01162871.1.p1	XP_014287320.1	1.45722
GECQ01162871.1.p1	XP_014287319.1	1.45722
GECQ01162871.1.p1	XP_014287318.1	1.45722
GECQ01162871.1.p1	XP_014287317.1	1.45722
GECQ01195796.1.p1	XP_014277717.1	0.4149
GECQ01496523.1.p1	XP_024215580.1	1.45722
GECQ01496523.1.p1	XP_024215579.1	1.45722
GECQ01103953.1.p1	XP_024216972.1	1.45722
GECQ01103953.1.p1	XP_024216971.1	1.45722
GECQ01103953.1.p1	XP_024216970.1	1.45722
GECQ01103953.1.p1	XP_024216969.1	1.45722
GECQ01425371.1.p1	XP_014286374.1	0.273
GECQ01264268.1.p1	XP_024214892.1	1.45722
GECQ01264268.1.p1	XP_014286290.1	1.45722
GECQ01264268.1.p1	XP_014286289.1	1.45722
GECQ01155940.1.p1	XP_014288012.1	1.45722
GECQ01198260.1.p1	XP_024217089.1	1.45722
GECQ01198260.1.p1	XP_024217088.1	1.45722
GECQ01459330.1.p1	XP_014294654.1	1.01329
GECQ01003671.1.p1	XP_014272881.1	0.80496
GECQ01201168.1.p1	XP_014283183.1	1.04265
GECQ01359959.1.p1	XP_014272576.1	0.4225
GECQ01388701.1.p1	XP_014283320.1	0.0618
GECQ01446316.1.p1	XP_014275125.1	0.8328
GECQ01014094.1.p1	XP_014277034.1	0.1268
GECQ01281251.1.p1	XP_014288551.1	0.0558
GECQ01506041.1.p1	XP_014270219.1	1.45722
GECQ01506041.1.p1	XP_014270218.1	1.45722
GECQ01506041.1.p1	XP_014270217.1	1.45722
GECQ01506041.1.p1	XP_014270216.1	1.45722
GECQ01506041.1.p1	XP_014270215.1	1.45722
GECQ01369576.1.p1	XP_014291151.1	0.3543
GECQ01044062.1.p1	XP_014277062.1	1.45722
GECQ01373008.1.p1	XP_024217733.1	2.91445
GECQ01373008.1.p1	XP_024217732.1	2.91445
GECQ01325699.1.p1	XP_024217894.1	0.61564
GECQ01059376.1.p1	XP_014282954.1	1.34326
GECQ01196698.1.p1	XP_014293278.1	0.0664
GECQ01225928.1.p2	XP_014279299.1	0.87967
GECQ01225928.1.p2	XP_014279298.1	0.87967
GECQ01291657.1.p1	XP_014277066.1	1.26508
GECQ01031579.1.p1	XP_014289162.1	1.45722
GECQ01196287.1.p1	XP_024217744.1	0.76296
GECQ01402304.1.p1	XP_014274167.1	1.45722
GECQ01292818.1.p1	XP_014282094.1	1.45722
GECQ01158236.1.p1	XP_014285681.1	0.85038
GECQ01044685.1.p1	XP_014275952.1	1.00042
GECQ01104727.1.p1	XP_014289394.1	1.45722
GECQ01104727.1.p1	XP_014289392.1	1.45722
GECQ01159539.1.p1	XP_014278673.1	1.1401
GECQ01341704.1.p2	XP_014272736.1	1.45722
GECQ01341704.1.p2	XP_014272735.1	1.45722
GECQ01173089.1.p1	XP_024217416.1	1.45722
GECQ01173089.1.p1	XP_014280997.1	1.45722
GECQ01173089.1.p1	XP_014280996.1	1.45722
GECQ01173089.1.p1	XP_014280995.1	1.45722
GECQ01173089.1.p1	XP_014280993.1	1.45722
GECQ01173089.1.p1	XP_014280992.1	1.45722
GECQ01173089.1.p1	XP_014280990.1	1.45722
GECQ01509939.1.p1	XP_014283389.1	0.76862
GECQ01440372.1.p1	XP_024216432.1	1.45722
GECQ01440372.1.p1	XP_014273175.1	1.45722
GECQ01440372.1.p1	XP_014273174.1	1.45722
GECQ01440372.1.p1	XP_014273173.1	1.45722
GECQ01440372.1.p1	XP_014273172.1	1.45722
GECQ01220523.1.p1	XP_014287396.1	0.49763
GECQ01152315.1.p1	XP_014279853.1	0.57445
GECQ01086932.1.p2	XP_014275176.1	0.372
GECQ01249171.1.p2	XP_014272580.1	0.58263
GECQ01435654.1.p1	XP_014281741.1	1.45722
GECQ01039060.1.p1	XP_014275584.1	0.5554
GECQ01404906.1.p1	XP_014275474.1	1.45722
GECQ01404906.1.p1	XP_014275473.1	1.45722
GECQ01401440.1.p1	XP_014279333.1	1.40825
GECQ01401440.1.p1	XP_014279332.1	1.40825
GECQ01482542.1.p1	XP_014271081.1	0.93621
GECQ01125586.1.p1	XP_014279394.1	0.80648
GECQ01009406.1.p1	XP_014285943.1	0.64628
GECQ01251673.1.p1	XP_014288993.1	1.45722
GECQ01251673.1.p1	XP_014288992.1	1.45722
GECQ01251673.1.p1	XP_014288991.1	1.45722
GECQ01353002.1.p1	XP_014284056.1	0.55001
GECQ01211847.1.p1	XP_014273915.1	1.45722
GECQ01372559.1.p2	XP_014293925.1	1.45722
GECQ01372559.1.p2	XP_014293924.1	1.45722
GECQ01372559.1.p2	XP_014293923.1	1.45722
GECQ01203820.1.p1	XP_014270875.1	1.06103
GECQ01204956.1.p1	XP_014274960.1	0.49259
GECQ01262484.1.p1	XP_014276929.1	0.87418
GECQ01180822.1.p1	XP_014289978.2	1.40777
GECQ01192462.1.p1	XP_014275781.1	1.45722
GECQ01192462.1.p1	XP_014275780.1	1.45722
GECQ01275886.1.p1	XP_014285145.1	1.0728
GECQ01044735.1.p1	XP_014281485.1	1.18364
GECQ01421776.1.p1	XP_024217492.1	1.45722
GECQ01193459.1.p1	XP_014293056.1	1.45722
GECQ01193459.1.p1	XP_014292386.1	1.45722
GECQ01193459.1.p1	XP_014291693.1	1.45722
GECQ01337989.1.p1	XP_014277658.1	0.3058
GECQ01316314.1.p1	XP_014289854.1	0.81991
GECQ01238996.1.p1	XP_014287389.1	1.19493
GECQ01481645.1.p1	XP_024214093.1	1.38184
GECQ01434491.1.p1	XP_014294046.1	1.45722
GECQ01008831.1.p2	XP_014277346.1	0.79412
GECQ01224848.1.p1	XP_014285022.1	0.70324
GECQ01442003.1.p1	XP_014278337.1	0.85188
GECQ01309566.1.p1	XP_024217450.1	1.45722
GECQ01309566.1.p1	XP_014292363.1	1.45722
GECQ01309566.1.p1	XP_014292362.1	1.45722
GECQ01309566.1.p1	XP_014292361.1	1.45722
GECQ01309566.1.p1	XP_014292360.1	1.45722
GECQ01404985.1.p1	XP_014286424.1	0.441
GECQ01016841.1.p1	XP_014291023.1	1.45722
GECQ01016841.1.p1	XP_014291022.1	1.45722
GECQ01016841.1.p1	XP_014291021.1	1.45722
GECQ01025882.1.p1	XP_014278959.1	0.61955
GECQ01106736.1.p1	XP_014283592.1	1.45722
GECQ01106736.1.p1	XP_014283582.1	1.45722
GECQ01106736.1.p1	XP_014283574.1	1.45722
GECQ01106736.1.p1	XP_014283570.1	1.45722
GECQ01106736.1.p1	XP_014283560.1	1.45722
GECQ01106736.1.p1	XP_014283551.1	1.45722
GECQ01062256.1.p1	XP_014283888.1	0.51726
GECQ01396873.1.p1	XP_014272532.1	0.4512
GECQ01323022.1.p1	XP_024219756.1	1.45722
GECQ01323022.1.p1	XP_014276709.1	1.45722
GECQ01323022.1.p1	XP_014276708.1	1.45722
GECQ01323022.1.p1	XP_014276707.1	1.45722
GECQ01323022.1.p1	XP_014276706.1	1.45722
GECQ01323022.1.p1	XP_014276705.1	1.45722
GECQ01323022.1.p1	XP_014276704.1	1.45722
GECQ01163424.1.p1	XP_014275215.1	1.45722
GECQ01483936.1.p2	XP_014275770.1	0.3635
GECQ01491356.1.p1	XP_024218283.1	1.45722
GECQ01491356.1.p1	XP_024218282.1	1.45722
GECQ01491356.1.p1	XP_014277446.1	1.45722
GECQ01491356.1.p1	XP_014277445.1	1.45722
GECQ01491356.1.p1	XP_014277443.1	1.45722
GECQ01491356.1.p1	XP_014277442.1	1.45722
GECQ01491356.1.p1	XP_014277441.1	1.45722
GECQ01491356.1.p1	XP_014277440.1	1.45722
GECQ01491356.1.p1	XP_014277439.1	1.45722
GECQ01455190.1.p1	XP_014288623.1	0.88429
GECQ01455190.1.p1	XP_014288622.1	0.88429
GECQ01300502.1.p1	XP_014293664.1	0.95362
GECQ01185938.1.p1	XP_014281445.1	0.72723
GECQ01232338.1.p1	XP_014279028.1	0.3045
GECQ01201982.1.p1	XP_014274248.1	0.99494
GECQ01201982.1.p1	XP_014274247.1	0.99494
GECQ01201982.1.p1	XP_014274245.1	0.99494
GECQ01240027.1.p1	XP_014273403.1	0.1978
GECQ01226946.1.p2	XP_024216022.1	0.84614
GECQ01239237.1.p1	XP_024214889.1	1.09652
GECQ01239237.1.p1	XP_024214888.1	1.09652
GECQ01239237.1.p1	XP_024214887.1	1.09652
GECQ01239237.1.p1	XP_024214886.1	1.09652
GECQ01239237.1.p1	XP_024214885.1	1.09652
GECQ01239237.1.p1	XP_024214884.1	1.09652
GECQ01166269.1.p1	XP_014277993.1	1.45722
GECQ01180585.1.p1	XP_014279424.1	1.45722
GECQ01180585.1.p1	XP_014279423.1	1.45722
GECQ01180585.1.p1	XP_014279421.1	1.45722
GECQ01232597.1.p2	XP_014289908.1	1.06984
GECQ01362765.1.p1	XP_024214874.1	1.45722
GECQ01436499.1.p1	XP_014281128.1	1.45722
GECQ01233909.1.p1	XP_014287074.1	0.83557
GECQ01429366.1.p1	XP_024220061.1	0.68287
GECQ01521983.1.p1	XP_014288732.1	1.45722
GECQ01521983.1.p1	XP_014288731.1	1.45722
GECQ01054629.1.p1	XP_024220179.1	0.78278
GECQ01419584.1.p2	XP_014278299.1	1.06234
GECQ01419584.1.p2	XP_014278298.1	1.06234
GECQ01419584.1.p2	XP_014278297.1	1.06234
GECQ01388171.1.p1	XP_014281602.1	0.2318
GECQ01199220.1.p1	XP_014282465.1	1.45722
GECQ01199220.1.p1	XP_014282461.1	1.45722
GECQ01199220.1.p1	XP_014282453.1	1.45722
GECQ01199220.1.p1	XP_014282446.1	1.45722
GECQ01199220.1.p1	XP_014282437.1	1.45722
GECQ01199220.1.p1	XP_014282428.1	1.45722
GECQ01199220.1.p1	XP_014282423.1	1.45722
GECQ01199220.1.p1	XP_014282416.1	1.45722
GECQ01199220.1.p1	XP_014282408.1	1.45722
GECQ01199220.1.p1	XP_014282401.1	1.45722
GECQ01199220.1.p1	XP_014282393.1	1.45722
GECQ01354628.1.p1	XP_014282729.1	1.20813
GECQ01204462.1.p1	XP_014286160.1	0.2268
GECQ01508146.1.p1	XP_014284638.1	1.45722
GECQ01508146.1.p1	XP_014284637.1	1.45722
GECQ01442399.1.p1	XP_014290169.1	1.45722
GECQ01442399.1.p1	XP_014290168.1	1.45722
GECQ01306428.1.p1	XP_024219258.1	1.45722
GECQ01306428.1.p1	XP_024219257.1	1.45722
GECQ01306428.1.p1	XP_024219256.1	1.45722
[truncated: 90,848 more rows]
