# Supplementary material for: Exploration of Candidate Genes Involved in the Biosynthesis, Regulation and Recognition of the Male-Produced Aggregation Pheromone of Halyomorpha halys
Source: Insects. 2023 Feb 8;14(2):163. doi: 10.3390/insects14020163 (PMC9960045; doi:10.3390/insects14020163)
Supplement: Supplementary file 1 [file insects-14-00163-s001.zip › Supplementary table S3.xls]

## Sheet: 附加材料WGCNA
Supplementary Table S3. Detail information in red module.
fromNode	toNode	weight	undirected or directed
XM_014420697.1	XM_014420705.1	0.110166	undirected
XM_014420697.1	XM_014420817.1	0.108884	undirected
XM_014420697.1	XM_014420871.1	0.191765	undirected
XM_014420697.1	XM_014420891.2	0.0881124	undirected
XM_014420697.1	XM_014420896.2	0.138491	undirected
XM_014420697.1	XM_014420972.2	0.108701	undirected
XM_014420697.1	XM_014420983.2	0.130368	undirected
XM_014420697.1	XM_014420995.2	0.0752413	undirected
XM_014420697.1	XM_014421002.2	0.0238097	undirected
XM_014420697.1	XM_014421028.2	0.100855	undirected
XM_014420697.1	XM_014421042.1	0.217915	undirected
XM_014420697.1	XM_014421045.1	0.0946849	undirected
XM_014420697.1	XM_014421068.2	0.0831422	undirected
XM_014420697.1	XM_014421169.2	0.0709305	undirected
XM_014420697.1	XM_014421217.2	0.246584	undirected
XM_014420697.1	XM_014421224.1	0.14449	undirected
XM_014420697.1	XM_014421228.2	0.148531	undirected
XM_014420697.1	XM_014421240.1	0.180078	undirected
XM_014420697.1	XM_014421273.2	0.245228	undirected
XM_014420697.1	XM_014421306.1	0.226806	undirected
XM_014420697.1	XM_014421311.2	0.245601	undirected
XM_014420697.1	XM_014421339.1	0.111935	undirected
XM_014420697.1	XM_014421415.2	0.149869	undirected
XM_014420697.1	XM_014421500.1	0.0857282	undirected
XM_014420697.1	XM_014421522.2	0.13604	undirected
XM_014420697.1	XM_014421529.1	0.123816	undirected
XM_014420697.1	XM_014421533.1	0.133665	undirected
XM_014420697.1	XM_014421543.1	0.145458	undirected
XM_014420697.1	XM_014421581.2	0.0542208	undirected
XM_014420697.1	XM_014421620.1	0.109095	undirected
XM_014420697.1	XM_014421622.1	0.0803362	undirected
XM_014420697.1	XM_014421632.2	0.123599	undirected
XM_014420697.1	XM_014421795.1	0.0447735	undirected
XM_014420697.1	XM_014421817.2	0.254238	undirected
XM_014420697.1	XM_014421832.1	0.116706	undirected
XM_014420697.1	XM_014421994.2	0.135978	undirected
XM_014420697.1	XM_014422084.2	0.231784	undirected
XM_014420697.1	XM_014422133.2	0.114653	undirected
XM_014420697.1	XM_014422153.2	0.0913515	undirected
XM_014420697.1	XM_014422284.1	0.155581	undirected
XM_014420697.1	XM_014422356.1	0.176841	undirected
XM_014420697.1	XM_014422408.1	0.0563243	undirected
XM_014420697.1	XM_014422459.1	0.255863	undirected
XM_014420697.1	XM_014422460.1	0.217915	undirected
XM_014420697.1	XM_014422469.2	0.0784967	undirected
XM_014420697.1	XM_014422508.2	0.0932088	undirected
XM_014420697.1	XM_014422582.1	0.164833	undirected
XM_014420697.1	XM_014422630.1	0.151493	undirected
XM_014420697.1	XM_014422636.1	0.217915	undirected
XM_014420697.1	XM_014422657.1	0.177534	undirected
XM_014420697.1	XM_014422669.2	0.194478	undirected
XM_014420697.1	XM_014422709.2	0.234637	undirected
XM_014420697.1	XM_014422774.1	0.225885	undirected
XM_014420697.1	XM_014422817.2	0.0423625	undirected
XM_014420697.1	XM_014422924.1	0.109108	undirected
XM_014420697.1	XM_014422925.1	0.167462	undirected
XM_014420697.1	XM_014422981.1	0.107065	undirected
XM_014420697.1	XM_014423042.1	0.195306	undirected
XM_014420697.1	XM_014423119.2	0.0848175	undirected
XM_014420697.1	XM_014423132.2	0.102304	undirected
XM_014420697.1	XM_014423133.1	0.148372	undirected
XM_014420697.1	XM_014423152.2	0.123794	undirected
XM_014420697.1	XM_014423163.1	0.0228101	undirected
XM_014420697.1	XM_014423175.2	0.171307	undirected
XM_014420697.1	XM_014423241.2	0.148175	undirected
XM_014420697.1	XM_014423262.2	0.0501161	undirected
XM_014420697.1	XM_014423289.1	0.0829335	undirected
XM_014420697.1	XM_014423387.1	0.123684	undirected
XM_014420697.1	XM_014423391.1	0.0698828	undirected
XM_014420697.1	XM_014423510.1	0.220564	undirected
XM_014420697.1	XM_014423619.1	0.219522	undirected
XM_014420697.1	XM_014423637.1	0.0582967	undirected
XM_014420697.1	XM_014423642.1	0.107134	undirected
XM_014420697.1	XM_014423653.1	0.156329	undirected
XM_014420697.1	XM_014423723.2	0.150526	undirected
XM_014420697.1	XM_014423764.1	0.246748	undirected
XM_014420697.1	XM_014423820.2	0.104068	undirected
XM_014420697.1	XM_014423859.1	0.0513621	undirected
XM_014420697.1	XM_014423861.1	0.166047	undirected
XM_014420697.1	XM_014423870.2	0.0292766	undirected
XM_014420697.1	XM_014423871.2	0.129931	undirected
XM_014420697.1	XM_014423872.2	0.171144	undirected
XM_014420697.1	XM_014423922.2	0.105964	undirected
XM_014420697.1	XM_014423980.1	0.073576	undirected
XM_014420697.1	XM_014424016.1	0.0989486	undirected
XM_014420697.1	XM_014424032.2	0.0789964	undirected
XM_014420697.1	XM_014424065.2	0.0801762	undirected
XM_014420697.1	XM_014424069.1	0.073576	undirected
XM_014420697.1	XM_014424111.1	0.155222	undirected
XM_014420697.1	XM_014424147.1	0.087841	undirected
XM_014420697.1	XM_014424169.2	0.151102	undirected
XM_014420697.1	XM_014424202.2	0.0849302	undirected
XM_014420697.1	XM_014424251.2	0.0896912	undirected
XM_014420697.1	XM_014424344.1	0.119403	undirected
XM_014420697.1	XM_014424396.2	0.184428	undirected
XM_014420697.1	XM_014424398.2	0.0679049	undirected
XM_014420697.1	XM_014424437.1	0.0665545	undirected
XM_014420697.1	XM_014424491.1	0.219565	undirected
XM_014420697.1	XM_014424555.1	0.066242	undirected
XM_014420697.1	XM_014424591.2	0.187929	undirected
XM_014420697.1	XM_014424619.1	0.116976	undirected
XM_014420697.1	XM_014424622.2	0.0477324	undirected
XM_014420697.1	XM_014424633.1	0.0772482	undirected
XM_014420697.1	XM_014424728.1	0.237824	undirected
XM_014420697.1	XM_014424787.2	0.161188	undirected
XM_014420697.1	XM_014424814.2	0.115348	undirected
XM_014420697.1	XM_014424954.2	0.219547	undirected
XM_014420697.1	XM_014424968.1	0.123138	undirected
XM_014420697.1	XM_014425050.2	0.172597	undirected
XM_014420697.1	XM_014425118.2	0.134283	undirected
XM_014420697.1	XM_014425217.2	0.141766	undirected
XM_014420697.1	XM_014425273.1	0.223315	undirected
XM_014420697.1	XM_014425293.1	0.127732	undirected
XM_014420697.1	XM_014425318.2	0.191205	undirected
XM_014420697.1	XM_014425330.2	0.0584497	undirected
XM_014420697.1	XM_014425482.1	0.198179	undirected
XM_014420697.1	XM_014425549.2	0.0428804	undirected
XM_014420697.1	XM_014425645.1	0.0268039	undirected
XM_014420697.1	XM_014425704.2	0.0800373	undirected
XM_014420697.1	XM_014425732.2	0.0386918	undirected
XM_014420697.1	XM_014425765.2	0.24638	undirected
XM_014420697.1	XM_014425770.2	0.0220832	undirected
XM_014420697.1	XM_014425823.2	0.188711	undirected
XM_014420697.1	XM_014425863.2	0.0856282	undirected
XM_014420697.1	XM_014425878.2	0.0578695	undirected
XM_014420697.1	XM_014425896.2	0.208889	undirected
XM_014420697.1	XM_014425930.1	0.19668	undirected
XM_014420697.1	XM_014425940.2	0.12199	undirected
XM_014420697.1	XM_014425951.2	0.0994709	undirected
XM_014420697.1	XM_014425995.2	0.172821	undirected
XM_014420697.1	XM_014426074.2	0.250297	undirected
XM_014420697.1	XM_014426119.2	0.141336	undirected
XM_014420697.1	XM_014426191.2	0.0636812	undirected
XM_014420697.1	XM_014426211.2	0.196776	undirected
XM_014420697.1	XM_014426249.1	0.150311	undirected
XM_014420697.1	XM_014426263.2	0.0778501	undirected
XM_014420697.1	XM_014426305.2	0.077017	undirected
XM_014420697.1	XM_014426395.2	0.159409	undirected
XM_014420697.1	XM_014426417.2	0.0852249	undirected
XM_014420697.1	XM_014426564.2	0.0569316	undirected
XM_014420697.1	XM_014426565.2	0.0982943	undirected
XM_014420697.1	XM_014426575.1	0.125004	undirected
XM_014420697.1	XM_014426578.1	0.0981914	undirected
XM_014420697.1	XM_014426579.2	0.102838	undirected
XM_014420697.1	XM_014426580.2	0.161227	undirected
XM_014420697.1	XM_014426662.1	0.0422755	undirected
XM_014420697.1	XM_014426720.1	0.0490604	undirected
XM_014420697.1	XM_014426740.2	0.0385243	undirected
XM_014420697.1	XM_014426763.1	0.0507343	undirected
XM_014420697.1	XM_014426764.1	0.113295	undirected
XM_014420697.1	XM_014426765.2	0.0960054	undirected
XM_014420697.1	XM_014426990.2	0.17939	undirected
XM_014420697.1	XM_014427024.2	0.121481	undirected
XM_014420697.1	XM_014427116.2	0.196694	undirected
XM_014420697.1	XM_014427117.2	0.211482	undirected
XM_014420697.1	XM_014427146.2	0.232759	undirected
XM_014420697.1	XM_014427265.2	0.173161	undirected
XM_014420697.1	XM_014427285.1	0.186137	undirected
XM_014420697.1	XM_014427333.1	0.172531	undirected
XM_014420697.1	XM_014427372.1	0.259386	undirected
XM_014420697.1	XM_014427410.2	0.154509	undirected
XM_014420697.1	XM_014427475.2	0.15339	undirected
XM_014420697.1	XM_014427487.1	0.200944	undirected
XM_014420697.1	XM_014427499.2	0.176511	undirected
XM_014420697.1	XM_014427549.1	0.073576	undirected
XM_014420697.1	XM_014427551.2	0.0454239	undirected
XM_014420697.1	XM_014427558.2	0.119307	undirected
XM_014420697.1	XM_014427582.2	0.0525212	undirected
XM_014420697.1	XM_014427618.1	0.182506	undirected
XM_014420697.1	XM_014427685.2	0.227484	undirected
XM_014420697.1	XM_014427763.1	0.148394	undirected
XM_014420697.1	XM_014427770.2	0.178662	undirected
XM_014420697.1	XM_014427880.2	0.156747	undirected
XM_014420697.1	XM_014427882.2	0.165474	undirected
XM_014420697.1	XM_014427884.2	0.11684	undirected
XM_014420697.1	XM_014427940.2	0.0270308	undirected
XM_014420697.1	XM_014427965.2	0.0383365	undirected
XM_014420697.1	XM_014427989.2	0.114988	undirected
XM_014420697.1	XM_014427990.1	0.116765	undirected
XM_014420697.1	XM_014428079.2	0.0211019	undirected
XM_014420697.1	XM_014428108.2	0.0723042	undirected
XM_014420697.1	XM_014428123.2	0.0382374	undirected
XM_014420697.1	XM_014428125.2	0.148332	undirected
XM_014420697.1	XM_014428171.2	0.073576	undirected
XM_014420697.1	XM_014428217.1	0.0321617	undirected
XM_014420697.1	XM_014428382.2	0.124966	undirected
XM_014420697.1	XM_014428453.1	0.115468	undirected
XM_014420697.1	XM_014428574.2	0.0644218	undirected
XM_014420697.1	XM_014428575.2	0.0425835	undirected
XM_014420697.1	XM_014428786.2	0.07671	undirected
XM_014420697.1	XM_014428793.2	0.204354	undirected
XM_014420697.1	XM_014428819.1	0.157464	undirected
XM_014420697.1	XM_014428834.2	0.0840743	undirected
XM_014420697.1	XM_014428854.1	0.0924648	undirected
XM_014420697.1	XM_014428900.1	0.110275	undirected
XM_014420697.1	XM_014428905.2	0.0593981	undirected
XM_014420697.1	XM_014428912.1	0.213044	undirected
XM_014420697.1	XM_014428996.1	0.132874	undirected
XM_014420697.1	XM_014429000.2	0.24089	undirected
XM_014420697.1	XM_014429002.1	0.0507728	undirected
XM_014420697.1	XM_014429088.2	0.17652	undirected
XM_014420697.1	XM_014429116.1	0.200057	undirected
XM_014420697.1	XM_014429160.2	0.0479614	undirected
XM_014420697.1	XM_014429175.2	0.0427425	undirected
XM_014420697.1	XM_014429179.2	0.111513	undirected
XM_014420697.1	XM_014429191.2	0.148619	undirected
XM_014420697.1	XM_014429206.2	0.172901	undirected
XM_014420697.1	XM_014429252.2	0.144768	undirected
XM_014420697.1	XM_014429257.2	0.0403347	undirected
XM_014420697.1	XM_014429276.2	0.0875824	undirected
XM_014420697.1	XM_014429278.2	0.177213	undirected
XM_014420697.1	XM_014429320.2	0.13953	undirected
XM_014420697.1	XM_014429383.1	0.190944	undirected
XM_014420697.1	XM_014429389.2	0.0909708	undirected
XM_014420697.1	XM_014429408.1	0.0816331	undirected
XM_014420697.1	XM_014429442.2	0.18908	undirected
XM_014420697.1	XM_014429460.2	0.151803	undirected
XM_014420697.1	XM_014429473.2	0.197749	undirected
XM_014420697.1	XM_014429476.2	0.0848972	undirected
XM_014420697.1	XM_014429539.1	0.112188	undirected
XM_014420697.1	XM_014429541.2	0.204293	undirected
XM_014420697.1	XM_014429642.2	0.073558	undirected
XM_014420697.1	XM_014429664.1	0.118285	undirected
XM_014420697.1	XM_014429666.1	0.259578	undirected
XM_014420697.1	XM_014429679.2	0.122766	undirected
XM_014420697.1	XM_014429698.1	0.0366009	undirected
XM_014420697.1	XM_014429710.2	0.217816	undirected
XM_014420697.1	XM_014429732.2	0.103018	undirected
XM_014420697.1	XM_014429754.2	0.0726666	undirected
XM_014420697.1	XM_014429786.2	0.095552	undirected
XM_014420697.1	XM_014429787.2	0.0257013	undirected
XM_014420697.1	XM_014429799.2	0.106408	undirected
XM_014420697.1	XM_014429816.1	0.082764	undirected
XM_014420697.1	XM_014429860.2	0.073576	undirected
XM_014420697.1	XM_014429889.2	0.117244	undirected
XM_014420697.1	XM_014429897.1	0.0841554	undirected
XM_014420697.1	XM_014429921.2	0.117131	undirected
XM_014420697.1	XM_014429923.2	0.038292	undirected
XM_014420697.1	XM_014429985.1	0.0422428	undirected
XM_014420697.1	XM_014429988.1	0.0662678	undirected
XM_014420697.1	XM_014430013.2	0.0448264	undirected
XM_014420697.1	XM_014430021.2	0.225037	undirected
XM_014420697.1	XM_014430076.1	0.0549003	undirected
XM_014420697.1	XM_014430171.2	0.0500291	undirected
XM_014420697.1	XM_014430261.2	0.0251293	undirected
XM_014420697.1	XM_014430262.2	0.049246	undirected
XM_014420697.1	XM_014430320.2	0.141997	undirected
XM_014420697.1	XM_014430347.2	0.0362068	undirected
XM_014420697.1	XM_014430481.1	0.170086	undirected
XM_014420697.1	XM_014430527.2	0.0365088	undirected
XM_014420697.1	XM_014430539.1	0.10462	undirected
XM_014420697.1	XM_014430540.2	0.061758	undirected
XM_014420697.1	XM_014430544.1	0.175379	undirected
XM_014420697.1	XM_014430570.2	0.0544292	undirected
XM_014420697.1	XM_014430580.2	0.162196	undirected
XM_014420697.1	XM_014430582.1	0.0490799	undirected
XM_014420697.1	XM_014430679.2	0.142407	undirected
XM_014420697.1	XM_014430827.1	0.0980461	undirected
XM_014420697.1	XM_014430862.2	0.189935	undirected
XM_014420697.1	XM_014430928.2	0.112568	undirected
XM_014420697.1	XM_014430969.2	0.0768048	undirected
XM_014420697.1	XM_014431038.1	0.113935	undirected
XM_014420697.1	XM_014431062.1	0.241431	undirected
XM_014420697.1	XM_014431111.2	0.0757529	undirected
XM_014420697.1	XM_014431150.1	0.218471	undirected
XM_014420697.1	XM_014431198.2	0.209045	undirected
XM_014420697.1	XM_014431210.2	0.091818	undirected
XM_014420697.1	XM_014431239.1	0.126695	undirected
XM_014420697.1	XM_014431245.2	0.119672	undirected
XM_014420697.1	XM_014431254.1	0.0531511	undirected
XM_014420697.1	XM_014431255.2	0.0654431	undirected
XM_014420697.1	XM_014431286.2	0.160535	undirected
XM_014420697.1	XM_014431292.2	0.0429764	undirected
XM_014420697.1	XM_014431336.1	0.0871191	undirected
XM_014420697.1	XM_014431362.1	0.122362	undirected
XM_014420697.1	XM_014431386.2	0.0317829	undirected
XM_014420697.1	XM_014431389.2	0.0696439	undirected
XM_014420697.1	XM_014431396.2	0.225267	undirected
XM_014420697.1	XM_014431438.1	0.059187	undirected
XM_014420697.1	XM_014431441.2	0.0703298	undirected
XM_014420697.1	XM_014431448.1	0.0301199	undirected
XM_014420697.1	XM_014431497.2	0.198995	undirected
XM_014420697.1	XM_014431531.2	0.121286	undirected
XM_014420697.1	XM_014431536.1	0.0355754	undirected
XM_014420697.1	XM_014431585.1	0.113586	undirected
XM_014420697.1	XM_014431650.1	0.0429764	undirected
XM_014420697.1	XM_014431671.1	0.0356611	undirected
XM_014420697.1	XM_014431700.2	0.136508	undirected
XM_014420697.1	XM_014431702.1	0.0676627	undirected
XM_014420697.1	XM_014431729.1	0.190722	undirected
XM_014420697.1	XM_014431730.2	0.0590929	undirected
XM_014420697.1	XM_014431818.2	0.0868075	undirected
XM_014420697.1	XM_014431819.1	0.183337	undirected
XM_014420697.1	XM_014431828.2	0.202056	undirected
XM_014420697.1	XM_014431947.1	0.159089	undirected
XM_014420697.1	XM_014431980.2	0.0999122	undirected
XM_014420697.1	XM_014431986.2	0.0339264	undirected
XM_014420697.1	XM_014432012.2	0.109699	undirected
XM_014420697.1	XM_014432021.2	0.221732	undirected
XM_014420697.1	XM_014432181.2	0.162862	undirected
XM_014420697.1	XM_014432297.1	0.217915	undirected
XM_014420697.1	XM_014432311.1	0.130921	undirected
XM_014420697.1	XM_014432346.2	0.179594	undirected
XM_014420697.1	XM_014432377.2	0.184709	undirected
XM_014420697.1	XM_014432399.2	0.19714	undirected
XM_014420697.1	XM_014432429.2	0.0379459	undirected
XM_014420697.1	XM_014432489.1	0.0847669	undirected
XM_014420697.1	XM_014432568.1	0.240878	undirected
XM_014420697.1	XM_014432593.1	0.109077	undirected
XM_014420697.1	XM_014432606.2	0.111298	undirected
XM_014420697.1	XM_014432608.2	0.157706	undirected
XM_014420697.1	XM_014432682.2	0.213276	undirected
XM_014420697.1	XM_014432746.2	0.0711207	undirected
XM_014420697.1	XM_014432768.1	0.102558	undirected
XM_014420697.1	XM_014432803.2	0.2067	undirected
XM_014420697.1	XM_014432858.2	0.0920865	undirected
XM_014420697.1	XM_014432876.2	0.0453318	undirected
XM_014420697.1	XM_014432974.2	0.147777	undirected
XM_014420697.1	XM_014432977.2	0.188723	undirected
XM_014420697.1	XM_014433007.2	0.0465579	undirected
XM_014420697.1	XM_014433039.2	0.0834474	undirected
XM_014420697.1	XM_014433045.2	0.071776	undirected
XM_014420697.1	XM_014433097.2	0.248049	undirected
XM_014420697.1	XM_014433106.2	0.0329978	undirected
XM_014420697.1	XM_014433193.1	0.0536629	undirected
XM_014420697.1	XM_014433215.2	0.0235378	undirected
XM_014420697.1	XM_014433225.2	0.100413	undirected
XM_014420697.1	XM_014433230.1	0.108288	undirected
XM_014420697.1	XM_014433237.1	0.225307	undirected
XM_014420697.1	XM_014433280.2	0.126718	undirected
XM_014420697.1	XM_014433284.1	0.0668184	undirected
XM_014420697.1	XM_014433296.1	0.0528395	undirected
XM_014420697.1	XM_014433304.1	0.202446	undirected
XM_014420697.1	XM_014433436.2	0.0434788	undirected
XM_014420697.1	XM_014433488.2	0.16232	undirected
XM_014420697.1	XM_014433489.2	0.201183	undirected
XM_014420697.1	XM_014433563.2	0.0573037	undirected
XM_014420697.1	XM_014433598.2	0.102236	undirected
XM_014420697.1	XM_014433644.1	0.0677101	undirected
XM_014420697.1	XM_014433646.1	0.107206	undirected
XM_014420697.1	XM_014433647.1	0.103514	undirected
XM_014420697.1	XM_014433648.1	0.0764088	undirected
XM_014420697.1	XM_014433763.2	0.20864	undirected
XM_014420697.1	XM_014433768.2	0.0647656	undirected
XM_014420697.1	XM_014433831.1	0.217915	undirected
XM_014420697.1	XM_014433832.1	0.101756	undirected
XM_014420697.1	XM_014433901.1	0.0551046	undirected
XM_014420697.1	XM_014434032.2	0.166324	undirected
XM_014420697.1	XM_014434120.1	0.0543454	undirected
XM_014420697.1	XM_014434132.1	0.217896	undirected
XM_014420697.1	XM_014434138.2	0.147527	undirected
XM_014420697.1	XM_014434233.2	0.234728	undirected
XM_014420697.1	XM_014434250.2	0.207535	undirected
XM_014420697.1	XM_014434313.2	0.177424	undirected
XM_014420697.1	XM_014434382.1	0.116634	undirected
XM_014420697.1	XM_014434383.1	0.0826945	undirected
XM_014420697.1	XM_014434385.1	0.0358477	undirected
XM_014420697.1	XM_014434409.1	0.11939	undirected
XM_014420697.1	XM_014434423.2	0.0827706	undirected
XM_014420697.1	XM_014434512.2	0.222025	undirected
XM_014420697.1	XM_014434605.2	0.191256	undirected
XM_014420697.1	XM_014434608.1	0.0338652	undirected
XM_014420697.1	XM_014434638.2	0.206601	undirected
XM_014420697.1	XM_014434645.1	0.0770907	undirected
XM_014420697.1	XM_014434729.2	0.0485074	undirected
XM_014420697.1	XM_014434795.1	0.1085	undirected
XM_014420697.1	XM_014434830.1	0.115371	undirected
XM_014420697.1	XM_014434835.2	0.213897	undirected
XM_014420697.1	XM_014434862.2	0.249963	undirected
XM_014420697.1	XM_014434885.2	0.074138	undirected
XM_014420697.1	XM_014434910.1	0.170285	undirected
XM_014420697.1	XM_014434925.2	0.12126	undirected
XM_014420697.1	XM_014434968.2	0.0578798	undirected
XM_014420697.1	XM_014434975.2	0.101797	undirected
XM_014420697.1	XM_014434995.2	0.0490472	undirected
XM_014420697.1	XM_014435075.2	0.0994699	undirected
XM_014420697.1	XM_014435086.2	0.107663	undirected
XM_014420697.1	XM_014435134.1	0.17943	undirected
XM_014420697.1	XM_014435137.2	0.214659	undirected
XM_014420697.1	XM_014435224.2	0.0241216	undirected
XM_014420697.1	XM_014435270.2	0.047385	undirected
XM_014420697.1	XM_014435358.2	0.0678933	undirected
XM_014420697.1	XM_014435505.1	0.184771	undirected
XM_014420697.1	XM_014435558.2	0.0785923	undirected
XM_014420697.1	XM_014435576.2	0.164648	undirected
XM_014420697.1	XM_014435620.2	0.211796	undirected
XM_014420697.1	XM_014435695.2	0.0565682	undirected
XM_014420697.1	XM_014435729.1	0.0689671	undirected
XM_014420697.1	XM_014435769.2	0.0980461	undirected
XM_014420697.1	XM_014435805.1	0.0313143	undirected
XM_014420697.1	XM_014435821.2	0.182757	undirected
XM_014420697.1	XM_014435899.2	0.039612	undirected
XM_014420697.1	XM_014435913.1	0.176666	undirected
XM_014420697.1	XM_014435949.1	0.226793	undirected
XM_014420697.1	XM_014435991.2	0.198957	undirected
XM_014420697.1	XM_014436114.2	0.180657	undirected
XM_014420697.1	XM_014436156.2	0.0872355	undirected
XM_014420697.1	XM_014436298.2	0.163421	undirected
XM_014420697.1	XM_014436350.2	0.192876	undirected
XM_014420697.1	XM_014436380.2	0.0321507	undirected
XM_014420697.1	XM_014436400.2	0.0809736	undirected
XM_014420697.1	XM_014436428.2	0.22526	undirected
XM_014420697.1	XM_014436445.1	0.0439561	undirected
XM_014420697.1	XM_014436467.2	0.188626	undirected
XM_014420697.1	XM_014436553.2	0.143408	undirected
XM_014420697.1	XM_014436570.2	0.0380216	undirected
XM_014420697.1	XM_014436626.1	0.0550496	undirected
XM_014420697.1	XM_014436780.2	0.0661994	undirected
XM_014420697.1	XM_014436811.1	0.0638858	undirected
XM_014420697.1	XM_014436882.2	0.0225653	undirected
XM_014420697.1	XM_014436887.1	0.13686	undirected
XM_014420697.1	XM_014436949.2	0.0904902	undirected
XM_014420697.1	XM_014436990.1	0.0446933	undirected
XM_014420697.1	XM_014437028.2	0.206601	undirected
XM_014420697.1	XM_014437042.2	0.236121	undirected
XM_014420697.1	XM_014437057.1	0.0693453	undirected
XM_014420697.1	XM_014437065.1	0.143963	undirected
XM_014420697.1	XM_014437104.1	0.174657	undirected
XM_014420697.1	XM_014437153.1	0.0616148	undirected
XM_014420697.1	XM_014437243.1	0.11456	undirected
XM_014420697.1	XM_014437285.1	0.18591	undirected
XM_014420697.1	XM_014437292.2	0.152856	undirected
XM_014420697.1	XM_014437298.1	0.251406	undirected
XM_014420697.1	XM_014437320.1	0.0533661	undirected
XM_014420697.1	XM_014437335.1	0.150681	undirected
XM_014420697.1	XM_014437388.1	0.183608	undirected
XM_014420697.1	XM_014437400.1	0.153836	undirected
XM_014420697.1	XM_014437409.1	0.19151	undirected
XM_014420697.1	XM_014437464.2	0.134582	undirected
XM_014420697.1	XM_014437467.2	0.0416359	undirected
XM_014420697.1	XM_014437586.1	0.0833565	undirected
XM_014420697.1	XM_014437602.1	0.0969565	undirected
XM_014420697.1	XM_014437626.1	0.210377	undirected
XM_014420697.1	XM_014437635.1	0.153119	undirected
XM_014420697.1	XM_014437678.2	0.0926134	undirected
XM_014420697.1	XM_014437791.1	0.113591	undirected
XM_014420697.1	XM_014437816.1	0.0889268	undirected
XM_014420697.1	XM_014437881.1	0.0954417	undirected
XM_014420697.1	XM_014437927.2	0.0449341	undirected
XM_014420697.1	XM_014438343.2	0.114634	undirected
XM_014420697.1	XM_014438352.2	0.168068	undirected
XM_014420697.1	XM_014438378.2	0.132436	undirected
XM_014420697.1	XM_014438440.2	0.205533	undirected
XM_014420697.1	XM_014438448.2	0.200063	undirected
XM_014420697.1	XM_014438467.1	0.0524495	undirected
XM_014420697.1	XM_014438490.2	0.0802948	undirected
XM_014420697.1	XM_014438538.2	0.193165	undirected
XM_014420697.1	XM_014438567.1	0.205056	undirected
XM_014420697.1	XM_014438614.1	0.180034	undirected
XM_014420697.1	XM_014438625.2	0.0865728	undirected
XM_014420697.1	XM_014438630.2	0.0909556	undirected
XM_014420697.1	XM_014438680.2	0.182907	undirected
XM_014420697.1	XM_014438684.1	0.152063	undirected
XM_014420697.1	XM_014438842.1	0.218161	undirected
XM_014420697.1	XM_014438847.1	0.0339259	undirected
XM_014420697.1	XM_014438852.2	0.149	undirected
XM_014420697.1	XM_014438854.2	0.248094	undirected
XM_014420697.1	XM_014438860.2	0.0529094	undirected
XM_014420697.1	XM_014438874.1	0.237646	undirected
XM_014420697.1	XM_014438893.1	0.164944	undirected
XM_014420697.1	XM_014438904.2	0.10063	undirected
XM_014420697.1	XM_014438969.1	0.0393292	undirected
XM_014420697.1	XM_014438989.2	0.207925	undirected
XM_014420697.1	XM_014439048.2	0.0410514	undirected
XM_014420697.1	XM_014439119.2	0.082103	undirected
XM_014420697.1	XM_014439128.2	0.0790085	undirected
XM_014420697.1	XM_014439179.2	0.0788684	undirected
XM_014420697.1	XM_014439199.1	0.165294	undirected
XM_014420697.1	XM_024358318.1	0.0282977	undirected
XM_014420697.1	XM_024358489.1	0.0324704	undirected
XM_014420697.1	XM_024358492.1	0.177814	undirected
XM_014420697.1	XM_024358566.1	0.0402237	undirected
XM_014420697.1	XM_024358654.1	0.0322183	undirected
XM_014420697.1	XM_024358767.1	0.145216	undirected
XM_014420697.1	XM_024358769.1	0.211043	undirected
XM_014420697.1	XM_024358773.1	0.211796	undirected
XM_014420697.1	XM_024358777.1	0.118099	undirected
XM_014420697.1	XM_024358791.1	0.191263	undirected
XM_014420697.1	XM_024358797.1	0.229752	undirected
XM_014420697.1	XM_024358813.1	0.183098	undirected
XM_014420697.1	XM_024358874.1	0.111679	undirected
XM_014420697.1	XM_024358877.1	0.0527126	undirected
XM_014420697.1	XM_024358930.1	0.0503952	undirected
XM_014420697.1	XM_024358948.1	0.0527565	undirected
XM_014420697.1	XM_024358996.1	0.0653715	undirected
XM_014420697.1	XM_024359006.1	0.160085	undirected
XM_014420697.1	XM_024359079.1	0.0292685	undirected
XM_014420697.1	XM_024359080.1	0.15248	undirected
XM_014420697.1	XM_024359099.1	0.161289	undirected
XM_014420697.1	XM_024359100.1	0.173156	undirected
XM_014420697.1	XM_024359142.1	0.0604078	undirected
XM_014420697.1	XM_024359174.1	0.0926168	undirected
XM_014420697.1	XM_024359305.1	0.103078	undirected
XM_014420697.1	XM_024359349.1	0.194056	undirected
XM_014420697.1	XM_024359359.1	0.0527863	undirected
XM_014420697.1	XM_024359388.1	0.0620356	undirected
XM_014420697.1	XM_024359407.1	0.128672	undirected
XM_014420697.1	XM_024359430.1	0.114424	undirected
XM_014420697.1	XM_024359610.1	0.219885	undirected
XM_014420697.1	XM_024359695.1	0.155906	undirected
XM_014420697.1	XM_024359722.1	0.165409	undirected
XM_014420697.1	XM_024359764.1	0.111263	undirected
XM_014420697.1	XM_024359799.1	0.236415	undirected
XM_014420697.1	XM_024359812.1	0.0531174	undirected
XM_014420697.1	XM_024359819.1	0.22015	undirected
XM_014420697.1	XM_024359849.1	0.0301511	undirected
XM_014420697.1	XM_024359860.1	0.214937	undirected
XM_014420697.1	XM_024359879.1	0.177814	undirected
XM_014420697.1	XM_024359900.1	0.0595605	undirected
XM_014420697.1	XM_024359956.1	0.177149	undirected
XM_014420697.1	XM_024359959.1	0.110183	undirected
XM_014420697.1	XM_024360010.1	0.180757	undirected
XM_014420697.1	XM_024360115.1	0.0412364	undirected
XM_014420697.1	XM_024360221.1	0.130979	undirected
XM_014420697.1	XM_024360254.1	0.174911	undirected
XM_014420697.1	XM_024360262.1	0.0895274	undirected
XM_014420697.1	XM_024360284.1	0.0715533	undirected
XM_014420697.1	XM_024360378.1	0.0347672	undirected
XM_014420697.1	XM_024360422.1	0.0820912	undirected
XM_014420697.1	XM_024360516.1	0.0701211	undirected
XM_014420697.1	XM_024360517.1	0.100564	undirected
XM_014420697.1	XM_024360536.1	0.176801	undirected
XM_014420697.1	XM_024360599.1	0.0870068	undirected
XM_014420697.1	XM_024360604.1	0.124117	undirected
XM_014420697.1	XM_024360612.1	0.190557	undirected
XM_014420697.1	XM_024360856.1	0.0403342	undirected
XM_014420697.1	XM_024360858.1	0.175582	undirected
XM_014420697.1	XM_024360882.1	0.123421	undirected
XM_014420697.1	XM_024361053.1	0.0903627	undirected
XM_014420697.1	XM_024361088.1	0.206657	undirected
XM_014420697.1	XM_024361208.1	0.166572	undirected
XM_014420697.1	XM_024361263.1	0.0611248	undirected
XM_014420697.1	XM_024361356.1	0.12833	undirected
XM_014420697.1	XM_024361357.1	0.183823	undirected
XM_014420697.1	XM_024361368.1	0.116436	undirected
XM_014420697.1	XM_024361426.1	0.0401825	undirected
XM_014420697.1	XM_024361433.1	0.135085	undirected
XM_014420697.1	XM_024361436.1	0.06995	undirected
XM_014420697.1	XM_024361448.1	0.133646	undirected
XM_014420697.1	XM_024361505.1	0.0843877	undirected
XM_014420697.1	XM_024361587.1	0.0538352	undirected
XM_014420697.1	XM_024361594.1	0.10652	undirected
XM_014420697.1	XM_024361675.1	0.0399509	undirected
XM_014420697.1	XM_024361746.1	0.139746	undirected
XM_014420697.1	XM_024361753.1	0.103514	undirected
XM_014420697.1	XM_024361782.1	0.120861	undirected
XM_014420697.1	XM_024361795.1	0.0489212	undirected
XM_014420697.1	XM_024361806.1	0.194299	undirected
XM_014420697.1	XM_024361810.1	0.0639034	undirected
XM_014420697.1	XM_024361812.1	0.204559	undirected
XM_014420697.1	XM_024361830.1	0.11401	undirected
XM_014420697.1	XM_024361983.1	0.0758652	undirected
XM_014420697.1	XM_024361985.1	0.196336	undirected
XM_014420697.1	XM_024362041.1	0.210659	undirected
XM_014420697.1	XM_024362056.1	0.10882	undirected
XM_014420697.1	XM_024362063.1	0.184958	undirected
XM_014420697.1	XM_024362075.1	0.241431	undirected
XM_014420697.1	XM_024362116.1	0.0353795	undirected
XM_014420697.1	XM_024362129.1	0.0734919	undirected
XM_014420697.1	XM_024362135.1	0.0829661	undirected
XM_014420697.1	XM_024362139.1	0.108824	undirected
XM_014420697.1	XM_024362166.1	0.143375	undirected
XM_014420697.1	XM_024362237.1	0.0725685	undirected
XM_014420697.1	XM_024362295.1	0.155531	undirected
XM_014420697.1	XM_024362325.1	0.0505485	undirected
XM_014420697.1	XM_024362332.1	0.203163	undirected
XM_014420697.1	XM_024362435.1	0.184936	undirected
XM_014420697.1	XM_024362450.1	0.0317338	undirected
XM_014420697.1	XM_024362490.1	0.0416639	undirected
XM_014420697.1	XM_024362516.1	0.0219341	undirected
XM_014420697.1	XM_024362540.1	0.175541	undirected
XM_014420697.1	XM_024362561.1	0.0632338	undirected
XM_014420697.1	XM_024362575.1	0.222529	undirected
XM_014420697.1	XM_024362622.1	0.156351	undirected
XM_014420697.1	XM_024362667.1	0.0416049	undirected
XM_014420697.1	XM_024362688.1	0.0359519	undirected
XM_014420697.1	XM_024362706.1	0.0928979	undirected
XM_014420697.1	XM_024362736.1	0.131626	undirected
XM_014420697.1	XM_024362759.1	0.182391	undirected
XM_014420697.1	XM_024362769.1	0.0815108	undirected
XM_014420697.1	XM_024362784.1	0.205006	undirected
XM_014420697.1	XM_024362805.1	0.0829447	undirected
XM_014420697.1	XM_024362819.1	0.0689717	undirected
XM_014420697.1	XM_024362872.1	0.0558568	undirected
XM_014420697.1	XM_024362894.1	0.21009	undirected
XM_014420697.1	XM_024362923.1	0.166429	undirected
XM_014420697.1	XM_024362931.1	0.195853	undirected
XM_014420697.1	XM_024362966.1	0.205983	undirected
XM_014420697.1	XM_024362989.1	0.126635	undirected
XM_014420697.1	XM_024363031.1	0.100897	undirected
XM_014420697.1	XM_024363180.1	0.0630677	undirected
XM_014420697.1	XM_024363203.1	0.0535887	undirected
XM_014420697.1	XM_024363206.1	0.175957	undirected
XM_014420697.1	XM_024363208.1	0.115638	undirected
XM_014420697.1	XM_024363223.1	0.0471871	undirected
XM_014420697.1	XM_024363285.1	0.035444	undirected
XM_014420697.1	XM_024363297.1	0.146772	undirected
XM_014420697.1	XM_024363328.1	0.256202	undirected
XM_014420697.1	XM_024363353.1	0.0218387	undirected
XM_014420697.1	XM_024363363.1	0.0600288	undirected
XM_014420697.1	XM_024363395.1	0.190583	undirected
XM_014420697.1	XM_024363436.1	0.0590786	undirected
XM_014420697.1	XM_024363468.1	0.0918415	undirected
XM_014420697.1	XM_024363481.1	0.196041	undirected
XM_014420697.1	XM_024363509.1	0.0325994	undirected
XM_014420697.1	XM_024363538.1	0.201075	undirected
XM_014420697.1	XM_024363589.1	0.0627524	undirected
XM_014420697.1	XM_024363593.1	0.119771	undirected
XM_014420697.1	XM_024363603.1	0.188469	undirected
XM_014420697.1	XM_024363663.1	0.179803	undirected
XM_014420697.1	XM_024363670.1	0.13808	undirected
XM_014420697.1	XM_024363674.1	0.207271	undirected
XM_014420697.1	XM_024363693.1	0.194968	undirected
XM_014420697.1	XM_024363710.1	0.0604279	undirected
XM_014420697.1	XM_024363717.1	0.12452	undirected
XM_014420697.1	XM_024363781.1	0.193867	undirected
XM_014420697.1	XM_024363802.1	0.167129	undirected
XM_014420697.1	XM_024363813.1	0.175083	undirected
XM_014420697.1	XM_024363829.1	0.153729	undirected
XM_014420697.1	XM_024363842.1	0.0571983	undirected
XM_014420697.1	XM_024363867.1	0.0519558	undirected
XM_014420697.1	XM_024363949.1	0.0837969	undirected
XM_014420697.1	XM_024363984.1	0.158307	undirected
XM_014420697.1	XM_024364047.1	0.152602	undirected
XM_014420697.1	XM_024364077.1	0.212137	undirected
XM_014420697.1	XM_024364086.1	0.195488	undirected
XM_014420697.1	XM_024364092.1	0.0654746	undirected
XM_014420697.1	XM_024364107.1	0.219966	undirected
XM_014420697.1	XM_024364132.1	0.0863152	undirected
XM_014420697.1	XM_024364138.1	0.0318199	undirected
XM_014420697.1	XM_024364142.1	0.184958	undirected
XM_014420697.1	XM_024364167.1	0.0935819	undirected
XM_014420697.1	XM_024364169.1	0.109572	undirected
XM_014420697.1	XM_024364306.1	0.0387191	undirected
XM_014420697.1	XM_024364362.1	0.219076	undirected
XM_014420697.1	XM_024364420.1	0.212494	undirected
