# Supplementary material for: Exploration of Candidate Genes Involved in the Biosynthesis, Regulation and Recognition of the Male-Produced Aggregation Pheromone of Halyomorpha halys
Source: Insects. 2023 Feb 8;14(2):163. doi: 10.3390/insects14020163 (PMC9960045; doi:10.3390/insects14020163)
Supplement: Supplementary file 1 [file insects-14-00163-s001.zip › Supplementary table S4.xls]

## Sheet: Supplementary table2
Supplementary Table S4. KEGG function enrichment result of red module.
Term	Database	ID	Input number	Background number	P-Value	Corrected P-Value	Input	Hyperlink	Enrich_ratio	Cluster	Cluster_size	Cluster_P-Value_median
Metabolic pathways	KEGG PATHWAY	dme01100	129	1111	2.26e-33	4.24e-30	XM_014429000.2|XM_024360517.1|XM_014438852.2|XM_014430261.2|XM_024363180.1|XM_014433225.2|XM_014437292.2|XM_024362706.1|XM_014425765.2|XM_014424491.1|XM_014424619.1|XM_014424591.2|XM_014439119.2|XM_024362450.1|XM_024363663.1|XM_014425823.2|XM_014428834.2|XM_014429278.2|XM_014425050.2|XM_014437678.2|XM_014429988.1|XM_014430544.1|XM_024360604.1|XM_024361426.1|XM_024359174.1|XM_014431702.1|XM_014435…	http://www.genome.jp/kegg-bin/show_pathway?dme01100/dme:Dmel_CG3861%09red/dme:Dmel_CG17374%09red/dme:Dmel_CG11956%09red/dme:Dmel_CG6950%09red/dme:Dmel_CG4752%09red/dme:Dmel_CG4703%09red/dme:Dmel_CG2259%09red/dme:Dmel_CG5214%09red/dme:Dmel_CG2767%09red/dme:Dmel_CG9160%09red/dme:Dmel_CG5547%09red/dme:Dmel_CG7860%09red/dme:Dmel_CG5548%09red/dme:Dmel_CG7461%09red/dme:Dmel_CG6726%09red/dme:Dmel_CG3001…	0.116112	NA	NA	0.000359831
Oxidative phosphorylation	KEGG PATHWAY	dme00190	39	144	3.94e-21	1.23e-18	XM_014438852.2|XM_014437042.2|XM_014430544.1|XM_014423922.2|XM_014437292.2|XM_014437927.2|XM_014422084.2|XM_014438448.2|XM_014425765.2|XM_014429541.2|XM_014427146.2|XM_014424491.1|XM_014438874.1|XM_014431828.2|XM_014423042.1|XM_014434313.2|XM_014429666.1|XM_014433304.1|XM_024363603.1|XM_024361830.1|XM_014425050.2|XM_014423764.1|XM_014425482.1|XM_014427763.1|XM_014422774.1|XM_014434835.2|XM_014425…	http://www.genome.jp/kegg-bin/show_pathway?dme00190/dme:Dmel_CG17332%09red/dme:Dmel_CG9172%09red/dme:Dmel_CG34083%09red/dme:Dmel_CG3612%09red/dme:Dmel_CG6020%09red/dme:Dmel_CG8189%09red/dme:Dmel_CG3192%09red/dme:Dmel_CG9306%09red/dme:Dmel_CG6030%09red/dme:Dmel_CG4769%09red/dme:Dmel_CG5548%09red/dme:Dmel_CG14235%09red/dme:Dmel_CG4412%09red/dme:Dmel_CG7361%09red/dme:Dmel_CG8680%09red/dme:Dmel_CG368…	0.270833	NA	NA	0.000359831
Carbon metabolism	KEGG PATHWAY	dme01200	22	123	1.8e-09	1.83e-07	XM_014422657.1|XM_014429000.2|XM_014438680.2|XM_014435821.2|XM_014432568.1|XM_024363180.1|XM_014437409.1|XM_014438538.2|XM_014429116.1|XM_014424619.1|XM_024363663.1|XM_024363693.1|XM_014426765.2|XM_014437678.2|XM_024360604.1|XM_014429179.2|XM_014430862.2|XM_014427117.2|XM_014426763.1|XM_014429088.2|XM_014426764.1|XM_014437104.1	http://www.genome.jp/kegg-bin/show_pathway?dme01200/dme:Dmel_CG6767%09red/dme:Dmel_CG4389%09red/dme:Dmel_CG8251%09red/dme:Dmel_CG5261%09red/dme:Dmel_CG3861%09red/dme:Dmel_CG11963%09red/dme:Dmel_CG5214%09red/dme:Dmel_CG17544%09red/dme:Dmel_CG7176%09red/dme:Dmel_CG11876%09red/dme:Dmel_CG8430%09red/dme:Dmel_CG9244%09red/dme:Dmel_CG3001%09red/dme:Dmel_CG4703%09red/dme:Dmel_CG7998%09red/dme:Dmel_CG701…	0.178862	1	4	7.7e-06
Peroxisome	KEGG PATHWAY	dme04146	18	91	1.38e-08	1.13e-06	XM_014429787.2|XM_014427024.2|XM_014429786.2|XM_024364169.1|XM_024364167.1|XM_014428575.2|XM_014424111.1|XM_024358797.1|XM_014435821.2|XM_014427685.2|XM_014422582.1|XM_014437104.1|XM_024363208.1|XM_024362332.1|XM_014428171.2|XM_014429179.2|XM_014429473.2|XM_024361806.1	http://www.genome.jp/kegg-bin/show_pathway?dme04146/dme:Dmel_CG4625%09red/dme:Dmel_CG11208%09red/dme:Dmel_CG5325%09red/dme:Dmel_CG11077%09red/dme:Dmel_CG3961%09red/dme:Dmel_CG6859%09red/dme:Dmel_CG8315%09red/dme:Dmel_CG7176%09red/dme:Dmel_CG1443%09red/dme:Dmel_CG17544%09red/dme:Dmel_CG14778%09red/dme:Dmel_CG9577%09red	0.197802	NA	NA	0.000359831
Citrate cycle (TCA cycle)	KEGG PATHWAY	dme00020	11	43	1.06e-06	5.38e-05	XM_014429000.2|XM_014437678.2|XM_014429116.1|XM_014438680.2|XM_014432568.1|XM_024363663.1|XM_024363693.1|XM_014429088.2|XM_014437409.1|XM_014429179.2|XM_014430862.2	http://www.genome.jp/kegg-bin/show_pathway?dme00020/dme:Dmel_CG5261%09red/dme:Dmel_CG3861%09red/dme:Dmel_CG11963%09red/dme:Dmel_CG5214%09red/dme:Dmel_CG7176%09red/dme:Dmel_CG11876%09red/dme:Dmel_CG5028%09red/dme:Dmel_CG7998%09red/dme:Dmel_CG7010%09red/dme:Dmel_CG9244%09red	0.255814	1	4	7.7e-06
Fatty acid metabolism	KEGG PATHWAY	dme01212	11	53	6.15e-06	0.000261854	XM_014422657.1|XM_014423653.1|XM_014434608.1|XM_014430679.2|XM_014435821.2|XM_014437388.1|XM_024362759.1|XM_014422582.1|XM_014437104.1|XM_014438538.2|XM_014435913.1	http://www.genome.jp/kegg-bin/show_pathway?dme01212/dme:Dmel_CG4389%09red/dme:Dmel_CG4703%09red/dme:Dmel_CG17374%09red/dme:Dmel_CG4581%09red/dme:Dmel_CG3523%09red/dme:Dmel_CG3961%09red/dme:Dmel_CG16935%09red/dme:Dmel_CG7461%09red/dme:Dmel_CG17544%09red/dme:Dmel_CG4600%09red	0.207547	6	5	0.00188613
Pentose and glucuronate interconversions	KEGG PATHWAY	dme00040	11	50	3.78e-06	0.000168494	XM_024360517.1|XM_024360516.1|XM_014430261.2|XM_014432429.2|XM_014427965.2|XM_014431448.1|XM_014430262.2|XM_014433644.1|XM_014430928.2|XM_024360599.1|XM_014431438.1	http://www.genome.jp/kegg-bin/show_pathway?dme00040/dme:Dmel_CG4302%09red/dme:Dmel_CG17323%09red/dme:Dmel_CG10178%09red/dme:Dmel_CG2767%09red/dme:Dmel_CG6084%09red/dme:Dmel_CG6649%09red/dme:Dmel_CG6475%09red	0.22	2	7	9.67e-06
Ascorbate and aldarate metabolism	KEGG PATHWAY	dme00053	9	33	6.59e-06	0.000268169	XM_024360517.1|XM_024360516.1|XM_014430261.2|XM_014431448.1|XM_014430262.2|XM_014433644.1|XM_014430928.2|XM_024360599.1|XM_014431438.1	http://www.genome.jp/kegg-bin/show_pathway?dme00053/dme:Dmel_CG4302%09red/dme:Dmel_CG17323%09red/dme:Dmel_CG10178%09red/dme:Dmel_CG6475%09red/dme:Dmel_CG6649%09red	0.272727	2	7	9.67e-06
Retinol metabolism	KEGG PATHWAY	dme00830	9	34	8.1e-06	0.000303096	XM_024360517.1|XM_024360516.1|XM_014430261.2|XM_014431448.1|XM_014430262.2|XM_014433644.1|XM_014430928.2|XM_024360599.1|XM_014431438.1	http://www.genome.jp/kegg-bin/show_pathway?dme00830/dme:Dmel_CG4302%09red/dme:Dmel_CG17323%09red/dme:Dmel_CG10178%09red/dme:Dmel_CG6475%09red/dme:Dmel_CG6649%09red	0.264706	2	7	9.67e-06
Porphyrin and chlorophyll metabolism	KEGG PATHWAY	dme00860	10	45	9.67e-06	0.000348054	XM_014423980.1|XM_024360517.1|XM_024360516.1|XM_014430261.2|XM_014431448.1|XM_014430262.2|XM_014433644.1|XM_014430928.2|XM_024360599.1|XM_014431438.1	http://www.genome.jp/kegg-bin/show_pathway?dme00860/dme:Dmel_CG4302%09red/dme:Dmel_CG17323%09red/dme:Dmel_CG10178%09red/dme:Dmel_CG4573%09red/dme:Dmel_CG6649%09red/dme:Dmel_CG6475%09red	0.222222	2	7	9.67e-06
Amino sugar and nucleotide sugar metabolism	KEGG PATHWAY	dme00520	10	47	1.35e-05	0.000466733	XM_014426763.1|XM_014432346.2|XM_024358318.1|XM_014429988.1|XM_014423872.2|XM_024363180.1|XM_014426764.1|XM_014426765.2|XM_014421240.1|XM_014427117.2	http://www.genome.jp/kegg-bin/show_pathway?dme00520/dme:Dmel_CG8251%09red/dme:Dmel_CG12449%09red/dme:Dmel_CG1969%09red/dme:Dmel_CG43374%09red/dme:Dmel_CG11257%09red/dme:Dmel_CG3001%09red/dme:Dmel_CG8890%09red	0.212766	3	5	0.000273647
2-Oxocarboxylic acid metabolism	KEGG PATHWAY	dme01210	7	19	1.43e-05	0.000479242	XM_014438680.2|XM_024363663.1|XM_024363693.1|XM_014424619.1|XM_024359174.1|XM_014429179.2|XM_014430862.2	http://www.genome.jp/kegg-bin/show_pathway?dme01210/dme:Dmel_CG3861%09red/dme:Dmel_CG6726%09red/dme:Dmel_CG7176%09red/dme:Dmel_CG5028%09red/dme:Dmel_CG9244%09red/dme:Dmel_CG8430%09red	0.368421	1	4	7.7e-06
Fatty acid degradation	KEGG PATHWAY	dme00071	8	33	4.45e-05	0.00117226	XM_014422657.1|XM_014435821.2|XM_014437388.1|XM_024362759.1|XM_014422582.1|XM_014437104.1|XM_014438538.2|XM_014423653.1	http://www.genome.jp/kegg-bin/show_pathway?dme00071/dme:Dmel_CG4389%09red/dme:Dmel_CG4703%09red/dme:Dmel_CG4581%09red/dme:Dmel_CG7461%09red/dme:Dmel_CG3961%09red/dme:Dmel_CG17544%09red/dme:Dmel_CG4600%09red	0.242424	6	5	0.00188613
Hippo signaling pathway - fly	KEGG PATHWAY	dme04391	10	61	9.57e-05	0.00229652	XM_014429175.2|XM_024361782.1|XM_014432012.2|XM_014429923.2|XM_024359080.1|XM_024359099.1|XM_014427551.2|XM_014421581.2|XM_014427549.1|XM_024361208.1	http://www.genome.jp/kegg-bin/show_pathway?dme04391/dme:Dmel_CG5680%09red/dme:Dmel_CG10491%09red/dme:Dmel_CG42318%09red/dme:Dmel_CG4656%09red/dme:Dmel_CG6235%09red/dme:Dmel_CG7109%09red/dme:Dmel_CG2048%09red/dme:Dmel_CG6964%09red/dme:Dmel_CG1768%09red	0.163934	NA	NA	0.000359831
Toll and Imd signaling pathway	KEGG PATHWAY	dme04624	10	67	0.000190924	0.00365215	XM_024362490.1|XM_024362139.1|XM_024361505.1|XM_024363670.1|XM_014427551.2|XM_014421500.1|XM_014427549.1|XM_024361795.1|XM_014429897.1|XM_014433039.2	http://www.genome.jp/kegg-bin/show_pathway?dme04624/dme:Dmel_CG31217%09red/dme:Dmel_CG1651%09red/dme:Dmel_CG33956%09red/dme:Dmel_CG42734%09red/dme:Dmel_CG5680%09red	0.149254	NA	NA	0.000359831
Glycosphingolipid biosynthesis - globo and isoglobo series	KEGG PATHWAY	dme00603	4	6	0.000199577	0.00369909	XM_014427989.2|XM_014431254.1|XM_014431255.2|XM_014428574.2	http://www.genome.jp/kegg-bin/show_pathway?dme00603/dme:Dmel_CG7997%09red/dme:Dmel_CG17223%09red	0.666667	5	2	0.000949926
Drug metabolism - cytochrome P450	KEGG PATHWAY	dme00982	10	68	0.000212728	0.00371737	XM_014432876.2|XM_024360517.1|XM_024360516.1|XM_014430261.2|XM_014431448.1|XM_014430262.2|XM_014433644.1|XM_014430928.2|XM_024360599.1|XM_014431438.1	http://www.genome.jp/kegg-bin/show_pathway?dme00982/dme:Dmel_CG4302%09red/dme:Dmel_CG17323%09red/dme:Dmel_CG10178%09red/dme:Dmel_CG6649%09red/dme:Dmel_CG6475%09red/dme:Dmel_CG1742%09red	0.147059	2	7	9.67e-06
Glycolysis / Gluconeogenesis	KEGG PATHWAY	dme00010	9	55	0.000215384	0.00371737	XM_014426763.1|XM_024363180.1|XM_014437678.2|XM_014427965.2|XM_014426764.1|XM_014426765.2|XM_014437409.1|XM_014429088.2|XM_014427117.2	http://www.genome.jp/kegg-bin/show_pathway?dme00010/dme:Dmel_CG8251%09red/dme:Dmel_CG7010%09red/dme:Dmel_CG2767%09red/dme:Dmel_CG11876%09red/dme:Dmel_CG3001%09red/dme:Dmel_CG5261%09red	0.163636	3	5	0.000273647
Drug metabolism - other enzymes	KEGG PATHWAY	dme00983	12	97	0.000223796	0.00380861	XM_014432876.2|XM_014429278.2|XM_024360517.1|XM_024360516.1|XM_014430261.2|XM_014431448.1|XM_014430262.2|XM_024359430.1|XM_014433644.1|XM_014430928.2|XM_024360599.1|XM_014431438.1	http://www.genome.jp/kegg-bin/show_pathway?dme00983/dme:Dmel_CG4302%09red/dme:Dmel_CG17323%09red/dme:Dmel_CG10178%09red/dme:Dmel_CG6364%09red/dme:Dmel_CG6649%09red/dme:Dmel_CG1799%09red/dme:Dmel_CG6475%09red/dme:Dmel_CG1742%09red	0.123711	2	7	9.67e-06
Metabolism of xenobiotics by cytochrome P450	KEGG PATHWAY	dme00980	10	69	0.000236584	0.00396124	XM_014432876.2|XM_024360517.1|XM_024360516.1|XM_014430261.2|XM_014431448.1|XM_014430262.2|XM_014433644.1|XM_014430928.2|XM_024360599.1|XM_014431438.1	http://www.genome.jp/kegg-bin/show_pathway?dme00980/dme:Dmel_CG4302%09red/dme:Dmel_CG17323%09red/dme:Dmel_CG10178%09red/dme:Dmel_CG6649%09red/dme:Dmel_CG6475%09red/dme:Dmel_CG1742%09red	0.144928	2	7	9.67e-06
Starch and sucrose metabolism	KEGG PATHWAY	dme00500	7	33	0.000273647	0.00449357	XM_014426763.1|XM_014426263.2|XM_024363180.1|XM_014426764.1|XM_014426765.2|XM_014424591.2|XM_014427117.2	http://www.genome.jp/kegg-bin/show_pathway?dme00500/dme:Dmel_CG3001%09red/dme:Dmel_CG8251%09red/dme:Dmel_CG9364%09red/dme:Dmel_CG6904%09red	0.212121	3	5	0.000273647
Glycosaminoglycan degradation	KEGG PATHWAY	dme00531	5	15	0.000371091	0.00578902	XM_014429754.2|XM_014439128.2|XM_024362166.1|XM_014439119.2|XM_024362706.1	http://www.genome.jp/kegg-bin/show_pathway?dme00531/dme:Dmel_CG8646%09red/dme:Dmel_CG6201%09red/dme:Dmel_CG13397%09red/dme:Dmel_CG14291%09red	0.333333	4	2	0.000741341
Glycerophospholipid metabolism	KEGG PATHWAY	dme00564	9	63	0.000528739	0.00791839	XM_014427882.2|XM_024361983.1|XM_014426074.2|XM_014427880.2|XM_014426395.2|XM_014429320.2|XM_014422709.2|XM_014428171.2|XM_014426417.2	http://www.genome.jp/kegg-bin/show_pathway?dme00564/dme:Dmel_CG4625%09red/dme:Dmel_CG6718%09red/dme:Dmel_CG8256%09red/dme:Dmel_CG33116%09red/dme:Dmel_CG5547%09red/dme:Dmel_CG9526%09red/dme:Dmel_CG2818%09red	0.142857	NA	NA	0.000359831
Autophagy - animal	KEGG PATHWAY	dme04140	11	95	0.000671978	0.00924958	XM_024361812.1|XM_014423119.2|XM_014432012.2|XM_014420817.1|XM_014431497.2|XM_014438684.1|XM_014434995.2|XM_014424555.1|XM_014427551.2|XM_014423387.1|XM_014427549.1	http://www.genome.jp/kegg-bin/show_pathway?dme04140/dme:Dmel_CG1548%09red/dme:Dmel_CG5680%09red/dme:Dmel_CG32675%09red/dme:Dmel_CG7109%09red/dme:Dmel_CG42349%09red/dme:Dmel_CG6877%09red/dme:Dmel_CG17134%09red/dme:Dmel_CG4320%09red/dme:Dmel_CG6116%09red	0.115789	NA	NA	0.000359831
Biosynthesis of amino acids	KEGG PATHWAY	dme01230	9	66	0.000715807	0.00978095	XM_014438680.2|XM_024360604.1|XM_024363663.1|XM_024363693.1|XM_014424619.1|XM_014433225.2|XM_024359174.1|XM_014429179.2|XM_014430862.2	http://www.genome.jp/kegg-bin/show_pathway?dme01230/dme:Dmel_CG7470%09red/dme:Dmel_CG3861%09red/dme:Dmel_CG6726%09red/dme:Dmel_CG7176%09red/dme:Dmel_CG5028%09red/dme:Dmel_CG9244%09red/dme:Dmel_CG6767%09red/dme:Dmel_CG8430%09red	0.136364	1	4	7.7e-06
