# Supplementary material for: Exploration of Candidate Genes Involved in the Biosynthesis, Regulation and Recognition of the Male-Produced Aggregation Pheromone of Halyomorpha halys
Source: Insects. 2023 Feb 8;14(2):163. doi: 10.3390/insects14020163 (PMC9960045; doi:10.3390/insects14020163)
Supplement: Supplementary file 1 [file insects-14-00163-s001.zip › Supplementary table S5.xls]

## Sheet: Supplementary table3
Supplementary Table S5. GO function enrichment result of red module.
#Term	Database	ID	Input number	Background number	P-Value	Corrected P-Value	Input	Hyperlink
mitochondrion	Gene Ontology	GO:0005739	57	445	1.60566e-16	4.294e-14	XM_014429000.2|XM_014434608.1|XM_014438680.2|XM_014437042.2|XM_024363180.1|XM_014423861.1|XM_024362784.1|XM_014423764.1|XM_014438538.2|XM_024363363.1|XM_014433763.2|XM_024359879.1|XM_014425482.1|XM_014421224.1|XM_014427146.2|XM_014424491.1|XM_014420983.2|XM_014435695.2|XM_024363297.1|XM_024363663.1|XM_024363693.1|XM_014425732.2|XM_014426211.2|XM_014436298.2|XM_014423653.1|XM_014431700.2|XM_014429…	http://amigo.geneontology.org/amigo/term/GO:0005739
mitochondrial respiratory chain complex I	Gene Ontology	GO:0005747	21	47	1.84676e-15	3.84127e-13	XM_014425765.2|XM_014429541.2|XM_014431828.2|XM_014426305.2|XM_014425482.1|XM_014430544.1|XM_014427763.1|XM_014422774.1|XM_014424954.2|XM_014422084.2|XM_014422356.1|XM_014429666.1|XM_014433304.1|XM_024363603.1|XM_014425318.2|XM_014438852.2|XM_014424728.1|XM_024361830.1|XM_014425273.1|XM_014434313.2|XM_014435729.1	http://amigo.geneontology.org/amigo/term/GO:0005747
mitochondrial electron transport, NADH to ubiquinone	Gene Ontology	GO:0006120	17	32	1.02004e-13	1.90951e-11	XM_014425765.2|XM_014429541.2|XM_014426305.2|XM_014425482.1|XM_014430544.1|XM_014427763.1|XM_014422774.1|XM_014425318.2|XM_014422084.2|XM_014422356.1|XM_014429666.1|XM_014433304.1|XM_024363603.1|XM_014438852.2|XM_014424728.1|XM_014434313.2|XM_014435729.1	http://amigo.geneontology.org/amigo/term/GO:0006120
plasma membrane	Gene Ontology	GO:0005886	62	638	7.47763e-13	1.27256e-10	XM_024364086.1|XM_024358996.1|XM_014426579.2|XM_014437042.2|XM_024358773.1|XM_024363285.1|XM_014423870.2|XM_014430539.1|XM_014422469.2|XM_014423133.1|XM_014429897.1|XM_024362736.1|XM_014429460.2|XM_014434385.1|XM_024358877.1|XM_024358930.1|XM_014429799.2|XM_024358777.1|XM_014434409.1|XM_024362966.1|XM_024362450.1|XM_024362516.1|XM_014421795.1|XM_014426580.2|XM_014435505.1|XM_014425995.2|XM_014423…	http://amigo.geneontology.org/amigo/term/GO:0005886
NADH dehydrogenase activity	Gene Ontology	GO:0003954	14	28	2.94155e-11	4.58882e-09	XM_014425765.2|XM_014425482.1|XM_014438852.2|XM_014430544.1|XM_014427763.1|XM_014422774.1|XM_014425318.2|XM_014422084.2|XM_014422356.1|XM_014429666.1|XM_014433304.1|XM_024363603.1|XM_024361830.1|XM_014434313.2	http://amigo.geneontology.org/amigo/term/GO:0003954
transferase activity, transferring hexosyl groups	Gene Ontology	GO:0016758	15	40	1.46337e-10	2.10725e-08	XM_014437400.1|XM_014433647.1|XM_014427989.2|XM_014431254.1|XM_014433646.1|XM_024360517.1|XM_024360516.1|XM_014433648.1|XM_014430261.2|XM_014431255.2|XM_014431448.1|XM_014430262.2|XM_014433644.1|XM_014430928.2|XM_014431438.1	http://amigo.geneontology.org/amigo/term/GO:0016758
ATP binding	Gene Ontology	GO:0005524	48	512	1.01454e-09	1.11718e-07	XM_014429000.2|XM_024360378.1|XM_024358996.1|XM_014439179.2|XM_014437042.2|XM_024359860.1|XM_014427265.2|XM_024363180.1|XM_024359722.1|XM_014427487.1|XM_014423510.1|XM_014426720.1|XM_014431531.2|XM_014424491.1|XM_024364132.1|XM_014420983.2|XM_024360612.1|XM_014426211.2|XM_024362894.1|XM_014427285.1|XM_014431536.1|XM_014431292.2|XM_014427770.2|XM_024360221.1|XM_014424032.2|XM_024360536.1|XM_014434…	http://amigo.geneontology.org/amigo/term/GO:0005524
short-term memory	Gene Ontology	GO:0007614	11	20	1.85841e-09	1.83103e-07	XM_014437635.1|XM_024364047.1|XM_024361505.1|XM_014421500.1|XM_024362139.1|XM_014437028.2|XM_024358996.1|XM_024361795.1|XM_014429897.1|XM_024364077.1|XM_024363813.1	http://amigo.geneontology.org/amigo/term/GO:0007614
intracellular membrane-bounded organelle	Gene Ontology	GO:0043231	20	105	3.83852e-09	3.56866e-07	XM_024359879.1|XM_014437400.1|XM_014432876.2|XM_014433646.1|XM_024360517.1|XM_014433647.1|XM_024359142.1|XM_014433648.1|XM_014430261.2|XM_024358797.1|XM_014425217.2|XM_014431448.1|XM_014430262.2|XM_014433644.1|XM_024360516.1|XM_014430928.2|XM_024362332.1|XM_014426990.2|XM_014421339.1|XM_014431438.1	http://amigo.geneontology.org/amigo/term/GO:0043231
NADH dehydrogenase (ubiquinone) activity	Gene Ontology	GO:0008137	11	22	4.0033e-09	3.56866e-07	XM_014425765.2|XM_014425318.2|XM_014430544.1|XM_014431828.2|XM_014422774.1|XM_014422356.1|XM_014429666.1|XM_014426305.2|XM_024363603.1|XM_024361830.1|XM_014422084.2	http://amigo.geneontology.org/amigo/term/GO:0008137
UDP-glycosyltransferase activity	Gene Ontology	GO:0008194	12	32	1.03155e-08	8.77759e-07	XM_014437400.1|XM_014433647.1|XM_014433646.1|XM_024360517.1|XM_024360516.1|XM_014433648.1|XM_014430261.2|XM_014431448.1|XM_014430262.2|XM_014433644.1|XM_014430928.2|XM_014431438.1	http://amigo.geneontology.org/amigo/term/GO:0008194
myofibril assembly	Gene Ontology	GO:0030239	8	13	1.68276e-07	1.21159e-05	XM_024359819.1|XM_014433489.2|XM_014427265.2|XM_024364107.1|XM_014433488.2|XM_024363538.1|XM_014427285.1|XM_024363984.1	http://amigo.geneontology.org/amigo/term/GO:0030239
sarcomere	Gene Ontology	GO:0030017	7	9	3.31203e-07	2.29634e-05	XM_024359860.1|XM_014427265.2|XM_024361587.1|XM_024360612.1|XM_024362435.1|XM_024361985.1|XM_014427285.1	http://amigo.geneontology.org/amigo/term/GO:0030017
cytoplasm	Gene Ontology	GO:0005737	83	1386	4.93341e-07	3.07845e-05	XM_024360856.1|XM_014432311.1|XM_024358996.1|XM_014436156.2|XM_014426211.2|XM_014433832.1|XM_024364086.1|XM_014421994.2|XM_014420995.2|XM_014438625.2|XM_014431362.1|XM_024359799.1|XM_014426740.2|XM_014426119.2|XM_014434423.2|XM_014423510.1|XM_014427372.1|XM_014437065.1|XM_014431531.2|XM_014429799.2|XM_024358566.1|XM_014420983.2|XM_014435695.2|XM_014429679.2|XM_014433039.2|XM_014436882.2|XM_014425…	http://amigo.geneontology.org/amigo/term/GO:0005737
sarcomere organization	Gene Ontology	GO:0045214	10	31	5.58482e-07	3.16811e-05	XM_014437065.1|XM_024359860.1|XM_014427265.2|XM_014433488.2|XM_024360612.1|XM_024362435.1|XM_024361985.1|XM_014436553.2|XM_014427285.1|XM_014433489.2	http://amigo.geneontology.org/amigo/term/GO:0045214
response to oxidative stress	Gene Ontology	GO:0006979	14	73	7.80581e-07	4.29779e-05	XM_014425482.1|XM_014437635.1|XM_024364047.1|XM_014429732.2|XM_014426119.2|XM_014427551.2|XM_014421228.2|XM_024363813.1|XM_014422469.2|XM_014427549.1|XM_014432021.2|XM_014422084.2|XM_024364077.1|XM_014437028.2	http://amigo.geneontology.org/amigo/term/GO:0006979
muscle contraction	Gene Ontology	GO:0006936	7	11	8.70389e-07	4.65534e-05	XM_024359860.1|XM_014427265.2|XM_014433488.2|XM_024362435.1|XM_024361985.1|XM_014427285.1|XM_014433489.2	http://amigo.geneontology.org/amigo/term/GO:0006936
transmembrane transport	Gene Ontology	GO:0055085	23	198	9.63109e-07	5.00817e-05	XM_014433296.1|XM_024360378.1|XM_024363031.1|XM_024361436.1|XM_024363842.1|XM_024361433.1|XM_014434885.2|XM_014426580.2|XM_024362237.1|XM_014430171.2|XM_014437335.1|XM_014435505.1|XM_014438904.2|XM_014433563.2|XM_024361810.1|XM_014426575.1|XM_024363436.1|XM_014429160.2|XM_014432489.1|XM_014432977.2|XM_024362056.1|XM_014426579.2|XM_014426578.1	http://amigo.geneontology.org/amigo/term/GO:0055085
adult somatic muscle development	Gene Ontology	GO:0007527	8	18	1.1185e-06	5.51007e-05	XM_024359860.1|XM_014427265.2|XM_014433488.2|XM_014437057.1|XM_024362435.1|XM_024361985.1|XM_014427285.1|XM_014433489.2	http://amigo.geneontology.org/amigo/term/GO:0007527
UDP-glucose metabolic process	Gene Ontology	GO:0006011	6	8	2.78735e-06	0.000130448	XM_014437400.1|XM_014433647.1|XM_014433646.1|XM_014433648.1|XM_014433644.1|XM_014431438.1	http://amigo.geneontology.org/amigo/term/GO:0006011
chloride transmembrane transport	Gene Ontology	GO:1902476	7	14	2.92039e-06	0.000133341	XM_014426575.1|XM_024358930.1|XM_014430582.1|XM_014426580.2|XM_014426579.2|XM_024362736.1|XM_014426578.1	http://amigo.geneontology.org/amigo/term/GO:1902476
protein kinase activity	Gene Ontology	GO:0004672	12	63	5.08922e-06	0.000221559	XM_014439179.2|XM_024360221.1|XM_014429383.1|XM_014431531.2|XM_024359860.1|XM_024361985.1|XM_014427551.2|XM_024360612.1|XM_024362435.1|XM_024362894.1|XM_014427549.1|XM_014431536.1	http://amigo.geneontology.org/amigo/term/GO:0004672
axon extension	Gene Ontology	GO:0048675	8	24	6.33647e-06	0.000263597	XM_024362139.1|XM_024361505.1|XM_014427551.2|XM_014421500.1|XM_014435576.2|XM_014427549.1|XM_024361795.1|XM_014429897.1	http://amigo.geneontology.org/amigo/term/GO:0048675
cAMP-mediated signaling	Gene Ontology	GO:0019933	5	5	7.90712e-06	0.000303096	XM_014437635.1|XM_024364047.1|XM_024363813.1|XM_024364077.1|XM_014437028.2	http://amigo.geneontology.org/amigo/term/GO:0019933
segment specification	Gene Ontology	GO:0007379	7	17	7.98307e-06	0.000303096	XM_014436626.1|XM_014425118.2|XM_014429175.2|XM_014433901.1|XM_014435086.2|XM_014422636.1|XM_014430570.2	http://amigo.geneontology.org/amigo/term/GO:0007379
regulation of GTPase activity	Gene Ontology	GO:0043087	10	45	9.66817e-06	0.000348054	XM_014437881.1|XM_014437635.1|XM_024364047.1|XM_014437626.1|XM_024359959.1|XM_014424968.1|XM_024363813.1|XM_014422469.2|XM_024364077.1|XM_014437028.2	http://amigo.geneontology.org/amigo/term/GO:0043087
GTPase activator activity	Gene Ontology	GO:0005096	12	70	1.31199e-05	0.000463403	XM_014421832.1|XM_014437881.1|XM_014437635.1|XM_024364047.1|XM_014424437.1|XM_024359079.1|XM_014437626.1|XM_024359959.1|XM_014428912.1|XM_024363813.1|XM_024364077.1|XM_014437028.2	http://amigo.geneontology.org/amigo/term/GO:0005096
regulation of circadian rhythm	Gene Ontology	GO:0042752	7	19	1.43363e-05	0.000479242	XM_014437635.1|XM_024364047.1|XM_014429732.2|XM_024362516.1|XM_024363813.1|XM_024364077.1|XM_014437028.2	http://amigo.geneontology.org/amigo/term/GO:0042752
long-term memory	Gene Ontology	GO:0007616	11	60	1.72479e-05	0.000566458	XM_014437635.1|XM_024364047.1|XM_024359079.1|XM_014429679.2|XM_014429732.2|XM_014427551.2|XM_024358996.1|XM_024363813.1|XM_014427549.1|XM_024364077.1|XM_014437028.2	http://amigo.geneontology.org/amigo/term/GO:0007616
glucose 6-phosphate metabolic process	Gene Ontology	GO:0051156	5	7	2.3537e-05	0.000734356	XM_024363180.1|XM_014426763.1|XM_014426764.1|XM_014426765.2|XM_014427117.2	http://amigo.geneontology.org/amigo/term/GO:0051156
intracellular calcium activated chloride channel activity	Gene Ontology	GO:0005229	5	7	2.3537e-05	0.000734356	XM_014426579.2|XM_014426578.1|XM_014426575.1|XM_014426580.2|XM_014429816.1	http://amigo.geneontology.org/amigo/term/GO:0005229
presynaptic membrane	Gene Ontology	GO:0042734	7	21	2.43844e-05	0.000748322	XM_024362139.1|XM_014430347.2|XM_014435899.2|XM_024361505.1|XM_014421500.1|XM_024361795.1|XM_014429897.1	http://amigo.geneontology.org/amigo/term/GO:0042734
defense response to Gram-negative bacterium	Gene Ontology	GO:0050829	13	89	2.65822e-05	0.000777529	XM_014426575.1|XM_014423119.2|XM_014432746.2|XM_014434032.2|XM_024358948.1|XM_014434995.2|XM_014431386.2|XM_014426580.2|XM_024361356.1|XM_024361357.1|XM_014426579.2|XM_014426578.1|XM_014429460.2	http://amigo.geneontology.org/amigo/term/GO:0050829
mesoderm development	Gene Ontology	GO:0007498	10	52	2.89668e-05	0.000834244	XM_014431150.1|XM_024359819.1|XM_024358566.1|XM_014430540.2|XM_024364132.1|XM_014433563.2|XM_014437602.1|XM_024360612.1|XM_024363538.1|XM_024359799.1	http://amigo.geneontology.org/amigo/term/GO:0007498
positive regulation of synaptic growth at neuromuscular junction	Gene Ontology	GO:0045887	8	31	3.03169e-05	0.000837995	XM_024362139.1|XM_024361505.1|XM_014434032.2|XM_014429889.2|XM_014421500.1|XM_024361795.1|XM_014429897.1|XM_024359305.1	http://amigo.geneontology.org/amigo/term/GO:0045887
chromatin insulator sequence binding	Gene Ontology	GO:0043035	6	14	3.044e-05	0.000837995	XM_014436626.1|XM_014425118.2|XM_014433901.1|XM_014435086.2|XM_014422636.1|XM_014430570.2	http://amigo.geneontology.org/amigo/term/GO:0043035
chloride channel activity	Gene Ontology	GO:0005254	6	14	3.044e-05	0.000837995	XM_014426575.1|XM_014429816.1|XM_024358930.1|XM_014426579.2|XM_014426580.2|XM_014426578.1	http://amigo.geneontology.org/amigo/term/GO:0005254
olfactory learning	Gene Ontology	GO:0008355	8	32	3.68255e-05	0.000999091	XM_014437635.1|XM_024364047.1|XM_024359099.1|XM_014433563.2|XM_024362129.1|XM_024363813.1|XM_024364077.1|XM_014437028.2	http://amigo.geneontology.org/amigo/term/GO:0008355
protein binding	Gene Ontology	GO:0005515	45	693	4.17476e-05	0.00111645	XM_014439179.2|XM_024359860.1|XM_014434423.2|XM_014437153.1|XM_014427487.1|XM_024363949.1|XM_014427549.1|XM_024364132.1|XM_024363829.1|XM_014435576.2|XM_014430347.2|XM_014436626.1|XM_014426720.1|XM_014433039.2|XM_024362516.1|XM_024361594.1|XM_014421795.1|XM_014429539.1|XM_014422636.1|XM_024364362.1|XM_024361782.1|XM_024360221.1|XM_014427372.1|XM_014424032.2|XM_014432608.2|XM_014434032.2|XM_014438…	http://amigo.geneontology.org/amigo/term/GO:0005515
transmembrane transporter activity	Gene Ontology	GO:0022857	12	81	4.76664e-05	0.00123933	XM_024358877.1|XM_014421224.1|XM_024362237.1|XM_014434885.2|XM_014433563.2|XM_024363842.1|XM_014435505.1|XM_014432489.1|XM_014437335.1|XM_024363436.1|XM_014433296.1|XM_024359142.1	http://amigo.geneontology.org/amigo/term/GO:0022857
response to ecdysone	Gene Ontology	GO:0035075	6	16	5.54295e-05	0.00142142	XM_014436626.1|XM_014425118.2|XM_014433901.1|XM_014435086.2|XM_014422636.1|XM_014430570.2	http://amigo.geneontology.org/amigo/term/GO:0035075
ubiquinol-cytochrome-c reductase activity	Gene Ontology	GO:0008121	5	10	8.22744e-05	0.00208132	XM_014423042.1|XM_014425050.2|XM_014438448.2|XM_014434835.2|XM_014431396.2	http://amigo.geneontology.org/amigo/term/GO:0008121
fatty acid beta-oxidation	Gene Ontology	GO:0006635	7	27	9.35076e-05	0.00229652	XM_014435821.2|XM_014432974.2|XM_024362759.1|XM_014437104.1|XM_014438538.2|XM_014423653.1|XM_024362784.1	http://amigo.geneontology.org/amigo/term/GO:0006635
ATP synthesis coupled proton transport	Gene Ontology	GO:0015986	6	18	9.45919e-05	0.00229652	XM_014423764.1|XM_014427146.2|XM_014424491.1|XM_014437042.2|XM_014436298.2|XM_014425823.2	http://amigo.geneontology.org/amigo/term/GO:0015986
sensory perception of sound	Gene Ontology	GO:0007605	9	49	9.90204e-05	0.00234641	XM_024361782.1|XM_024362139.1|XM_024361505.1|XM_024360536.1|XM_014421500.1|XM_014425995.2|XM_024361795.1|XM_014429897.1|XM_014433045.2	http://amigo.geneontology.org/amigo/term/GO:0007605
terminal bouton	Gene Ontology	GO:0043195	8	38	0.000105232	0.00246242	XM_024362139.1|XM_014430347.2|XM_014435899.2|XM_024361505.1|XM_014433563.2|XM_014421500.1|XM_024361795.1|XM_014429897.1	http://amigo.geneontology.org/amigo/term/GO:0043195
oxidation-reduction process	Gene Ontology	GO:0055114	23	274	0.000117587	0.00268272	XM_014422657.1|XM_024360856.1|XM_014434608.1|XM_014422469.2|XM_024363363.1|XM_024359879.1|XM_014428793.2|XM_014429191.2|XM_014435695.2|XM_014432429.2|XM_014421228.2|XM_024361356.1|XM_024361357.1|XM_014434862.2|XM_024360262.1|XM_014435769.2|XM_024358797.1|XM_024362332.1|XM_014425704.2|XM_014435270.2|XM_014420972.2|XM_024359849.1|XM_014428905.2	http://amigo.geneontology.org/amigo/term/GO:0055114
positive regulation of multicellular organism growth	Gene Ontology	GO:0040018	6	19	0.00012106	0.00268272	XM_014437635.1|XM_024364047.1|XM_014429923.2|XM_024363813.1|XM_024364077.1|XM_014437028.2	http://amigo.geneontology.org/amigo/term/GO:0040018
renal tubular secretion	Gene Ontology	GO:0097254	4	5	0.000122909	0.00268272	XM_014432489.1|XM_024360378.1|XM_024363436.1|XM_024362056.1	http://amigo.geneontology.org/amigo/term/GO:0097254
glucose binding	Gene Ontology	GO:0005536	4	5	0.000122909	0.00268272	XM_024363180.1|XM_014426763.1|XM_014426764.1|XM_014426765.2	http://amigo.geneontology.org/amigo/term/GO:0005536
negative regulation of transcription, DNA-templated	Gene Ontology	GO:0045892	13	105	0.00012307	0.00268272	XM_014436626.1|XM_014431292.2|XM_014425118.2|XM_014429175.2|XM_014433901.1|XM_024359388.1|XM_014429732.2|XM_024361675.1|XM_014428786.2|XM_024361594.1|XM_014435086.2|XM_014422636.1|XM_014430570.2	http://amigo.geneontology.org/amigo/term/GO:0045892
locomotor rhythm	Gene Ontology	GO:0045475	9	51	0.000129751	0.00276016	XM_014437635.1|XM_024364047.1|XM_014433039.2|XM_014429732.2|XM_024362516.1|XM_014427487.1|XM_024363813.1|XM_024364077.1|XM_014437028.2	http://amigo.geneontology.org/amigo/term/GO:0045475
proton transmembrane transport	Gene Ontology	GO:1902600	9	51	0.000129751	0.00276016	XM_014423764.1|XM_014427146.2|XM_014424491.1|XM_024360882.1|XM_014423922.2|XM_014434250.2|XM_014436298.2|XM_024362736.1|XM_014425823.2	http://amigo.geneontology.org/amigo/term/GO:1902600
synaptic vesicle	Gene Ontology	GO:0008021	9	52	0.000147878	0.00311043	XM_014429799.2|XM_014435899.2|XM_024359079.1|XM_024362923.1|XM_014432608.2|XM_014433563.2|XM_014431947.1|XM_014429539.1|XM_014429252.2	http://amigo.geneontology.org/amigo/term/GO:0008021
mitochondrial respiratory chain complex III	Gene Ontology	GO:0005750	5	12	0.000160606	0.00323284	XM_014423042.1|XM_014425050.2|XM_014438448.2|XM_014434835.2|XM_014431396.2	http://amigo.geneontology.org/amigo/term/GO:0005750
M band	Gene Ontology	GO:0031430	5	12	0.000160606	0.00323284	XM_024363538.1|XM_024359860.1|XM_014436553.2|XM_024362435.1|XM_024361985.1	http://amigo.geneontology.org/amigo/term/GO:0031430
chloride transport	Gene Ontology	GO:0006821	5	12	0.000160606	0.00323284	XM_014426579.2|XM_014426578.1|XM_014426575.1|XM_014426580.2|XM_014429816.1	http://amigo.geneontology.org/amigo/term/GO:0006821
neuromuscular junction	Gene Ontology	GO:0031594	9	53	0.000168071	0.00334711	XM_024358773.1|XM_024362139.1|XM_024358777.1|XM_024359079.1|XM_024361505.1|XM_014437153.1|XM_014421500.1|XM_024361795.1|XM_014429897.1	http://amigo.geneontology.org/amigo/term/GO:0031594
response to heat	Gene Ontology	GO:0009408	9	54	0.000190509	0.00365215	XM_014437635.1|XM_024364047.1|XM_024364077.1|XM_014427551.2|XM_024363813.1|XM_014430171.2|XM_014427549.1|XM_014435729.1|XM_014437028.2	http://amigo.geneontology.org/amigo/term/GO:0009408
cytosol	Gene Ontology	GO:0005829	36	547	0.000191192	0.00365215	XM_024363593.1|XM_024358996.1|XM_014421994.2|XM_014424555.1|XM_024363180.1|XM_014422469.2|XM_024364138.1|XM_014423133.1|XM_024363363.1|XM_014430021.2|XM_024359879.1|XM_014438352.2|XM_024358654.1|XM_014429191.2|XM_014424619.1|XM_014429679.2|XM_014427487.1|XM_014432429.2|XM_014436811.1|XM_014434638.2|XM_014438625.2|XM_014431729.1|XM_014427117.2|XM_014427770.2|XM_024360221.1|XM_014432181.2|XM_024359…	http://amigo.geneontology.org/amigo/term/GO:0005829
fructokinase activity	Gene Ontology	GO:0008865	4	6	0.000199577	0.00369909	XM_024363180.1|XM_014426763.1|XM_014426764.1|XM_014426765.2	http://amigo.geneontology.org/amigo/term/GO:0008865
Ras protein signal transduction	Gene Ontology	GO:0007265	5	13	0.000216449	0.00371737	XM_014437635.1|XM_024364047.1|XM_024363813.1|XM_024364077.1|XM_014437028.2	http://amigo.geneontology.org/amigo/term/GO:0007265
regulation of multicellular organism growth	Gene Ontology	GO:0040014	5	13	0.000216449	0.00371737	XM_014437635.1|XM_024364047.1|XM_024363813.1|XM_024364077.1|XM_014437028.2	http://amigo.geneontology.org/amigo/term/GO:0040014
integral component of mitochondrial inner membrane	Gene Ontology	GO:0031305	6	22	0.000236997	0.00396124	XM_014421224.1|XM_014425951.2|XM_014432746.2|XM_014437298.1|XM_024362784.1|XM_014432606.2	http://amigo.geneontology.org/amigo/term/GO:0031305
negative regulation of synaptic growth at neuromuscular junction	Gene Ontology	GO:0045886	7	33	0.000273647	0.00449357	XM_014437635.1|XM_024364047.1|XM_024358654.1|XM_014437153.1|XM_024363813.1|XM_024364077.1|XM_014437028.2	http://amigo.geneontology.org/amigo/term/GO:0045886
mitochondrial electron transport, ubiquinol to cytochrome c	Gene Ontology	GO:0006122	5	14	0.000285928	0.00465441	XM_014423042.1|XM_014425050.2|XM_014438448.2|XM_014434835.2|XM_014431396.2	http://amigo.geneontology.org/amigo/term/GO:0006122
respiratory electron transport chain	Gene Ontology	GO:0022904	4	7	0.00030556	0.0049311	XM_014422356.1|XM_014429541.2|XM_014425273.1|XM_024362784.1	http://amigo.geneontology.org/amigo/term/GO:0022904
actin binding	Gene Ontology	GO:0003779	9	59	0.000343462	0.00549539	XM_024358773.1|XM_024358777.1|XM_014433489.2|XM_024361782.1|XM_014433488.2|XM_024361587.1|XM_024358769.1|XM_024359799.1|XM_024359819.1	http://amigo.geneontology.org/amigo/term/GO:0003779
protein phosphorylation	Gene Ontology	GO:0006468	15	151	0.000353152	0.00560254	XM_024364420.1|XM_024358996.1|XM_014431531.2|XM_024360221.1|XM_014424032.2|XM_024359860.1|XM_024361985.1|XM_014434032.2|XM_014427487.1|XM_014429383.1|XM_024362129.1|XM_024362435.1|XM_024362894.1|XM_014439179.2|XM_014431536.1	http://amigo.geneontology.org/amigo/term/GO:0006468
regulation of Rho protein signal transduction	Gene Ontology	GO:0035023	5	15	0.000371091	0.00578902	XM_014436811.1|XM_024359860.1|XM_024361985.1|XM_024362435.1|XM_014437464.2	http://amigo.geneontology.org/amigo/term/GO:0035023
flight	Gene Ontology	GO:0060361	4	8	0.000446571	0.00690893	XM_024359799.1|XM_014427285.1|XM_014427265.2|XM_014436553.2	http://amigo.geneontology.org/amigo/term/GO:0060361
tricarboxylic acid cycle	Gene Ontology	GO:0006099	6	26	0.000510415	0.00776826	XM_014429000.2|XM_014429116.1|XM_014438680.2|XM_024363663.1|XM_024363693.1|XM_014430862.2	http://amigo.geneontology.org/amigo/term/GO:0006099
calcium ion binding	Gene Ontology	GO:0005509	15	157	0.000515234	0.00777837	XM_024362116.1|XM_024362139.1|XM_014433598.2|XM_024364362.1|XM_024361505.1|XM_014421795.1|XM_014433215.2|XM_014431386.2|XM_014421500.1|XM_024362923.1|XM_014422709.2|XM_024361795.1|XM_014429897.1|XM_014429252.2|XM_014421028.2	http://amigo.geneontology.org/amigo/term/GO:0005509
phosphatidylinositol-4,5-bisphosphate binding	Gene Ontology	GO:0005546	5	17	0.000597244	0.00871524	XM_024361782.1|XM_014430347.2|XM_024358773.1|XM_024359305.1|XM_024358777.1	http://amigo.geneontology.org/amigo/term/GO:0005546
detoxification of zinc ion	Gene Ontology	GO:0010312	4	9	0.000628503	0.00871524	XM_024360422.1|XM_014434383.1|XM_014434382.1|XM_014434385.1	http://amigo.geneontology.org/amigo/term/GO:0010312
response to toxic substance	Gene Ontology	GO:0009636	4	9	0.000628503	0.00871524	XM_014432489.1|XM_024360378.1|XM_024363436.1|XM_024362056.1	http://amigo.geneontology.org/amigo/term/GO:0009636
