# Supplementary figures and images for: Exploration of Candidate Genes Involved in the Biosynthesis, Regulation and Recognition of the Male-Produced Aggregation Pheromone of Halyomorpha halys
Source: MDPI journal article supplement (doi:10.3390/insects14020163), 2023-02-08

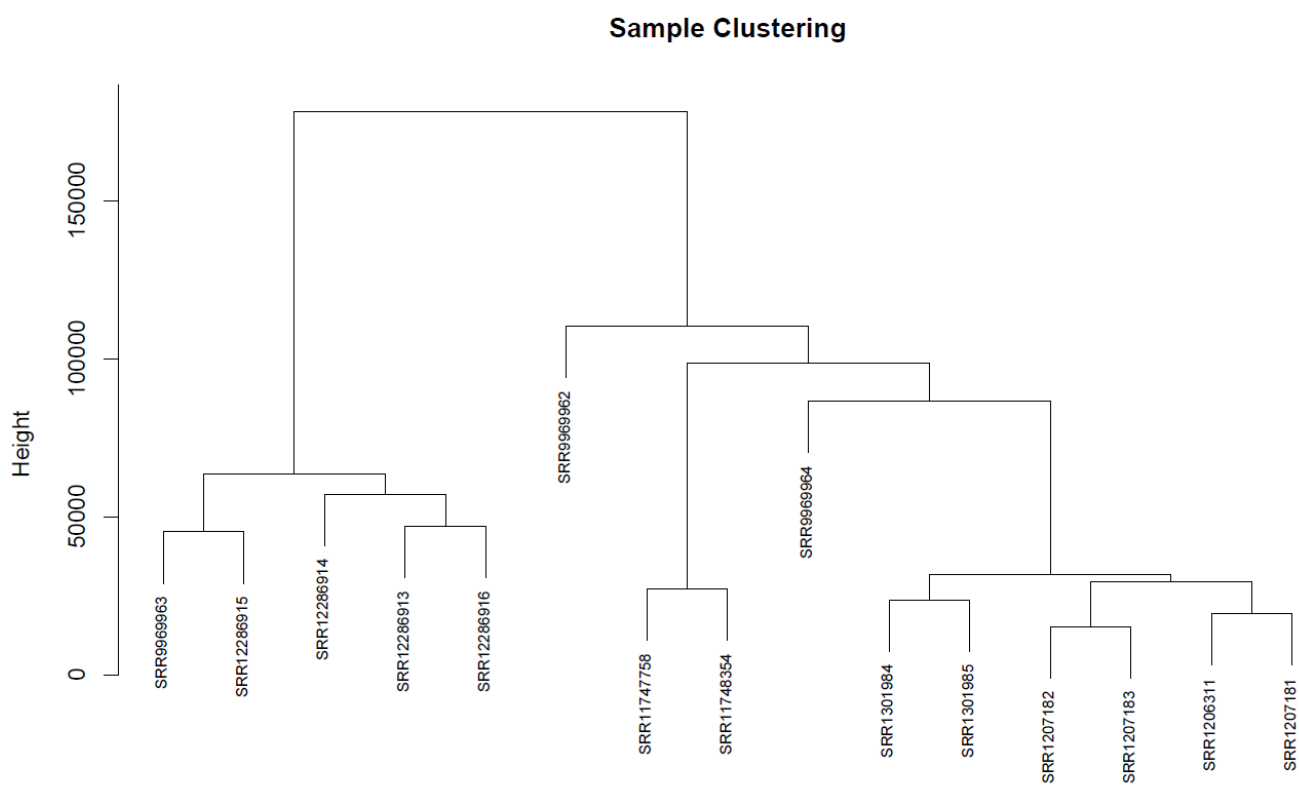

**Figure S1.** Sample clustering by WGCNA.

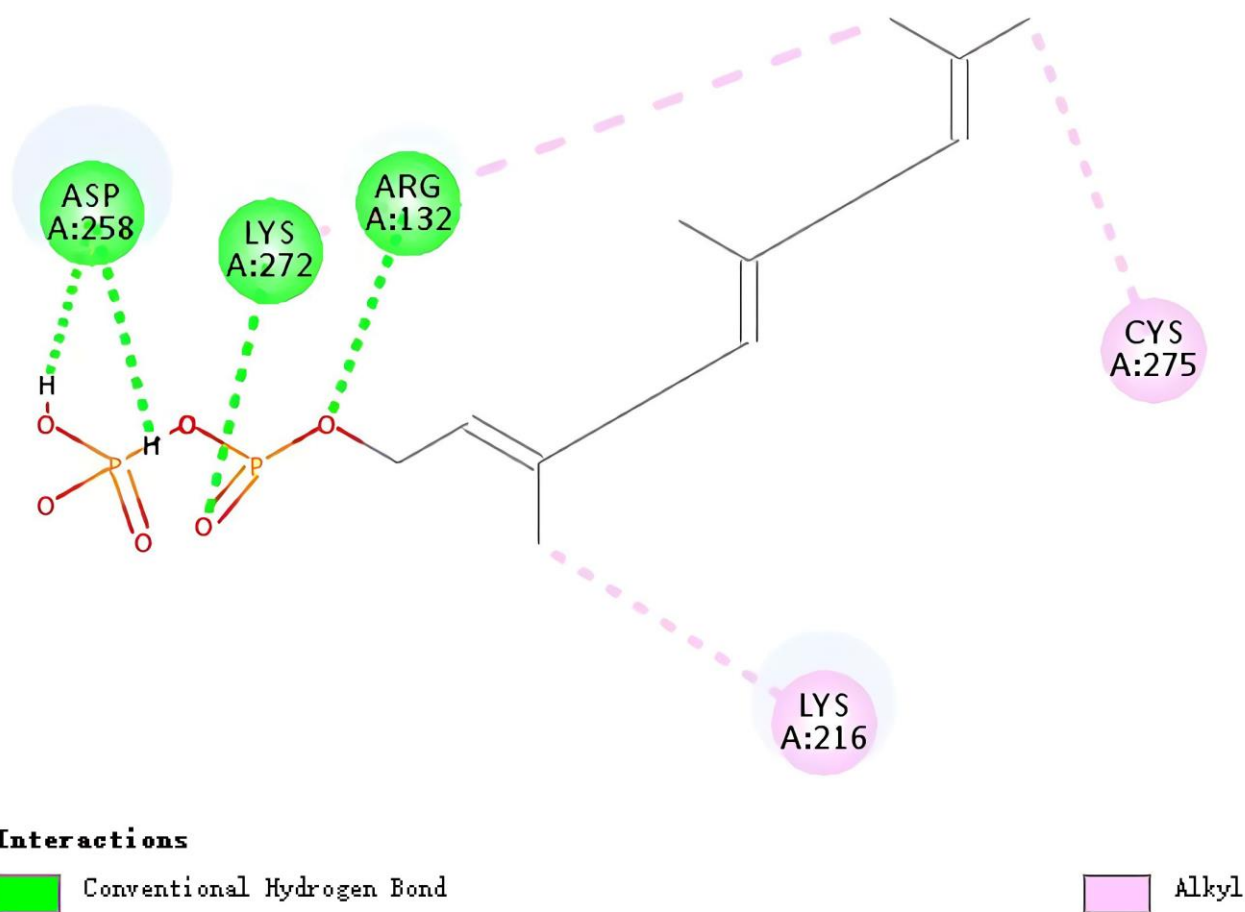

Figure S2. Molecular docking schematic of *HhTPS1* docking.

Supplement: s1 [file s1]
